# Supplementary material for: I2-catalyzed one-pot synthesis of pyrrolo[1,2-a]quinoxaline and imidazo[1,5-a]quinoxaline derivatives via sp3and sp2C–H cross-dehydrogenative coupling
Source: Royal Society of Chemistry journal article supplement (doi:10.1039/c5qo00124b), 2015-01-01

## ***Supporting Information***

### **I<sub>2</sub>-Catalyzed One-pot Synthesis of Pyrrolo[1,2-*a*]quinoxaline and Imidazo[1,5-*a*]quinoxaline Derivatives *via* *sp*<sup>3</sup> and *sp*<sup>2</sup> C-H Cross- Dehydrogenative Coupling**

**Zeyuan Zhang,<sup>a</sup> Caixia Xie,<sup>a</sup> Xiaochen Tan,<sup>a</sup> Gaolei Song,<sup>a</sup> Leilin Wen,<sup>a</sup> He Gao,<sup>a</sup>  
Chen Ma<sup>\* a,b</sup>**

<sup>a</sup>*School of Chemistry and Chemical Engineering, Shandong University, Jinan, 250100, P R China.*

<sup>b</sup>*State Key Laboratory of Natural and Biomimetic Drugs, Peking University, Beijing, 100191, P R China*

*E-mail: chenma@sdu.edu.cn*

#### **Table of Contents**

|                                                                                                                                                     |     |
|-----------------------------------------------------------------------------------------------------------------------------------------------------|-----|
| 1. General information.....                                                                                                                         | S2  |
| 2. Preparation of starting material.....                                                                                                            | S2  |
| 3. General experimental procedures for the synthesis of Pyrrolo[1,2- <i>a</i> ]quinoxaline and<br>Imidazo[1,5- <i>a</i> ]quinoxaline <b>4</b> ..... | S3  |
| 4. Spectra data.....                                                                                                                                | S4  |
| 5. References.....                                                                                                                                  | S12 |
| 6. <sup>1</sup> H NMR and <sup>13</sup> C NMR spectra.....                                                                                          | S13 |

## 1. General information

2-(1*H*-pyrrol-1-yl)aniline, 2-(1*H*-indol-1-yl)aniline and 2-(1*H*-imidazol-1-yl)aniline were prepared according to literature procedures.<sup>1-3</sup> Other reagents were commercially available and were used without further purification. All reactions were monitored by thin-layer chromatography (TLC). <sup>1</sup>H NMR spectra were recorded on a Bruker Avance 300 spectrometer at 300 MHz, using CDCl<sub>3</sub>, CD<sub>2</sub>Cl<sub>2</sub> and DMSO-*d*<sub>6</sub> as solvent and tetramethylsilane (TMS) as internal standard. <sup>13</sup>C NMR spectra were run in the same instrument at 75 MHz. HRMS spectra were determined on a Q-TOF6510 spectrograph (Agilent).

## 2. Preparation of starting material

### 2.1 General procedure for preparation of 1-(2-nitrophenyl)-1*H*-pyrrole IV<sup>1</sup>

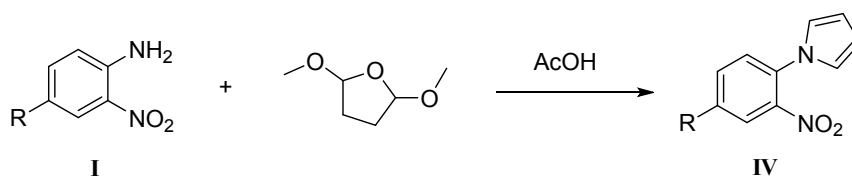

A mixture of *o*-nitroaniline **I** (10.00 mmol) and 2,5-dimethoxytetrahydrofuran (10.00 mmol) in acetic acid was refluxed for 1 h with vigorous stirring. The reaction mixture was cooled to ambient temperature and then poured into water. The precipitate was filtered and washed with water. The precipitate thus obtained was dissolved in ethyl acetate, dried over MgSO<sub>4</sub> and evaporated to dryness under reduced pressure. The residue thus obtained was filtered through a short pad of silica gel, using hexane/ethyl acetate as eluent, to afford compound **IV** which were directly used for next step without further purification.

### 2.2 General procedure for preparation of 1-(2-nitrophenyl)-1*H*-indole **V** and 1-(2-nitrophenyl)-1*H*-imidazole **VI**<sup>2</sup>

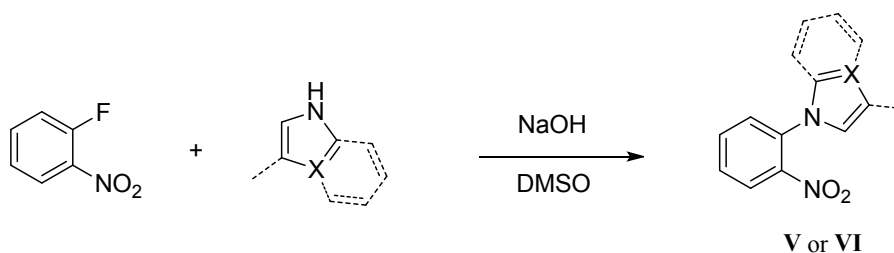

To a well-stirred solution of N-heterocycle (1.0 mmol) in DMSO (1.0 mL), NaOH (1.0 equiv.) and 1-fluoro-2-nitrobenzene (1.0 mmol) were added slowly. The reaction mixture was

### 2.3 General procedure for preparation of 2-(1*H*-N-heterocycl-1-yl)aniline 2<sup>3</sup>

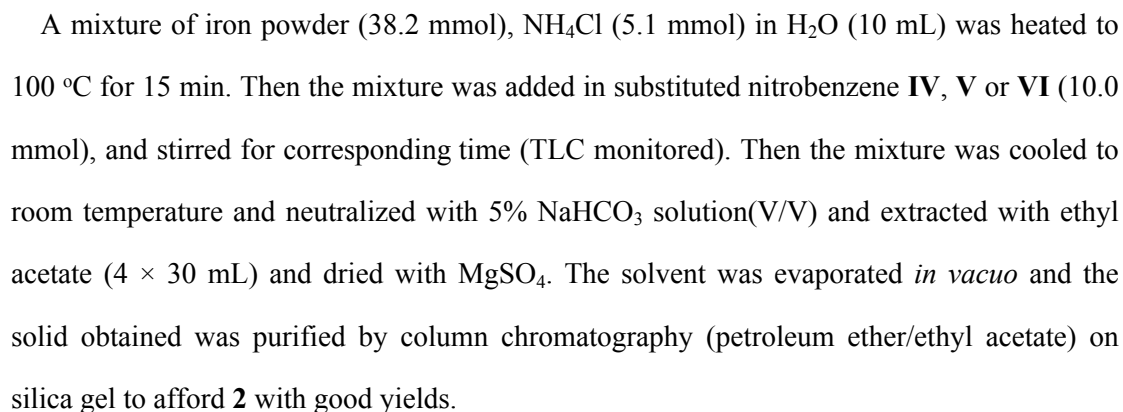

Reaction scheme showing the synthesis of compound **3** from compound **2** and compound **1** using  $I_2/DMSO$ .

Compound **2** (a 2-amino-4-R-phenyl-1H-imidazo[1,2-a]pyridine derivative) reacts with compound **1** (an aldehyde,  $R'-CHO$ ) to form compound **3** (a 2-(R'-oxoimino)-4-R-phenyl-1H-imidazo[1,2-a]pyridine derivative).

S3

## 4. Spectra data

### Phenyl(pyrrolo[1,2-a]quinoxalin-4-yl)methanone **3aa**

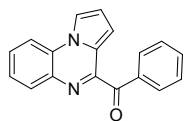

The title compound **3aa** was prepared according to general procedure 3. A purification by flash chromatography in petroleum ether : ethyl acetate : dichloromethane = 8 : 1 : 1 gave **3aa** as a Yellow solid (0.118 g, 87%). <sup>1</sup>H NMR (300 M, DMSO-*d*<sub>6</sub>):  $\delta$  8.64 (1H, *J* = 1.2, 2.7 Hz, dd), 8.41 (1H, *J* = 0.9, 8.4 Hz, dd), 8.07-8.04 (2H, m), 7.96 (1H, *J* = 1.5, 8.1 Hz, dd), 7.77-7.71 (2H, m), 7.61-7.53 (3H, m), 7.11 (1H, *J* = 1.2, 4.2 Hz, dd); <sup>13</sup>C NMR (75 MHz, DMSO-*d*<sub>6</sub>):  $\delta$  192.12, 149.53, 135.48, 134.03, 133.85, 130.45, 130.27, 129.81, 128.56, 127.52, 125.78, 123.36, 116.83, 115.03, 114.87, 108.25; HRMS calcd for C<sub>18</sub>H<sub>12</sub>N<sub>2</sub>O (M+H)<sup>+</sup> 273.1022; found: 273.1009.

### (4-Methoxyphenyl)(pyrrolo[1,2-a]quinoxalin-4-yl)methanone **3ab**

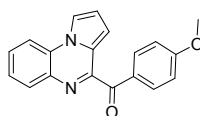

The title compound **3ab** was prepared according to general procedure 3. A purification by flash chromatography in petroleum ether : ethyl acetate : dichloromethane = 8 : 1 : 1 gave **3ab** as a Yellow solid (0.128 g, 85%). <sup>1</sup>H NMR (300 M, CDCl<sub>3</sub>):  $\delta$  8.23-8.18 (2H, m), 8.08-8.04 (2H, m), 7.95 (1H, *J* = 0.9, 8.1 Hz, dd), 7.67-7.61 (1H, m), 7.54-7.48 (1H, m), 7.18 (1H, *J* = 1.2, 4.2 Hz, dd), 7.03-6.96 (3H, m), 3.92 (3H, s); <sup>13</sup>C NMR (75 MHz, CDCl<sub>3</sub>):  $\delta$  190.81, 164.21, 150.76, 134.89, 133.45, 131.01, 129.17, 128.70, 127.97, 125.44, 124.51, 114.79, 114.69, 113.87, 113.76, 108.87, 55.55; HRMS calcd for C<sub>19</sub>H<sub>14</sub>N<sub>2</sub>O<sub>2</sub> (M+H)<sup>+</sup> 303.1128; found: 303.1157.

### Pyrrolo[1,2-a]quinoxalin-4-yl(p-tolyl)methanone **3ac**

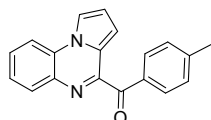

The title compound **3ac** was prepared according to general procedure 3. A purification by flash chromatography in petroleum ether : ethyl acetate : dichloromethane = 8 : 1 : 1 gave **3ac** as a Yellow solid (0.123 g, 86%). <sup>1</sup>H NMR (300 M, CDCl<sub>3</sub>):  $\delta$  8.10-8.05 (4H, m), 7.93 (1H, *J* = 0.6, 2.1 Hz, dd), 7.65-7.60 (1H, m), 7.52-7.46 (1H, m), 7.30 (2H, *J* = 8.1 Hz, d), 7.19 (1H, *J* = 1.2, 4.2 Hz, dd), 6.97 (1H, *J* = 2.7, 4.2 Hz, dd); <sup>13</sup>C NMR (75 MHz, CDCl<sub>3</sub>):  $\delta$  191.74, 150.25, 144.80, 134.39, 134.34, 133.22, 131.14, 130.82, 129.37, 129.16, 127.91, 125.57, 124.35, 115.03, 113.90, 109.34, 21.84; HRMS calcd for C<sub>19</sub>H<sub>14</sub>N<sub>2</sub>O (M+H)<sup>+</sup> 287.1179; found: 287.1174.

### Pyrrolo[1,2-a]quinoxalin-4-yl(o-tolyl)methanone **3ad**

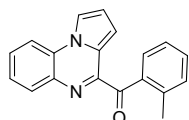

The title compound **3ad** was prepared according to general procedure 3. A purification by flash chromatography in petroleum ether : ethyl acetate : dichloromethane = 8 : 1 : 1 gave **3ad** as a Yellow solid (0.123 g, 88%). <sup>1</sup>H NMR (300 M, CDCl<sub>3</sub>):  $\delta$  8.03-8.02 (1H, m), 7.97 (1H, *J* = 1.2, 8.1 Hz, dd), 7.92 (1H, *J* = 8.1 Hz, d), 7.65-7.58 (2H, m), 7.45 (2H, *J* = 7.8 Hz, t), 7.34-7.31 (2H, m), 7.28-7.23 (1H, m), 6.98 (1H, *J* = 3.0, 4.2 Hz, dd), 2.54 (3H, s); <sup>13</sup>C NMR (75 MHz, CDCl<sub>3</sub>):  $\delta$  195.79, 150.18, 139.37, 139.33, 136.66, 136.61, 134.86, 131.68, 131.64, 131.59, 131.55, 131.48, 131.29, 129.59, 127.99, 125.40, 125.18, 124.26, 115.05,

114.65, 113.82, 109.12, 21.06; HRMS calcd for  $C_{19}H_{14}N_2O$  ( $M+H$ )<sup>+</sup> 287.1179; found: 287.1195.

**(4-Fluorophenyl)(pyrrolo[1,2-a]quinoxalin-4-yl)methanone 3ae**

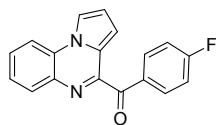

The title compound **3ae** was prepared according to general procedure 3. A purification by flash chromatography in petroleum ether : ethyl acetate : dichloromethane = 8 : 1 : 1 gave **3ae** as a Yellow solid (0.116 g, 80%). <sup>1</sup>H NMR (300 M, CD<sub>2</sub>Cl<sub>2</sub>): δ 8.26-8.21 (2H, m), 8.10 (1H, *J* = 1.5 Hz, d), 8.03-7.93 (2H, m), 7.70-7.65 (1H, m), 7.55-7.50 (1H, m), 7.26-7.19 (3H, m), 7.01-6.99 (1H, m); <sup>13</sup>C NMR (75 MHz, CD<sub>2</sub>Cl<sub>2</sub>): δ 190.91, 166.41 (<sup>1</sup>*J*<sub>C,F</sub> = 253.5, d), 149.77, 134.94, 134.06 (<sup>3</sup>*J*<sub>C,F</sub> = 9, d), 132.87 (<sup>4</sup>*J*<sub>C,F</sub> = 4, d), 131.20, 130.04, 128.36, 125.92, 124.67, 115.76 (<sup>2</sup>*J*<sub>C,F</sub> = 21.75, d), 115.50, 115.23, 114.43, 109.30; HRMS calcd for  $C_{18}H_{11}FN_2O$  ( $M+H$ )<sup>+</sup> 291.0928; found: 291.0935.

**(4-Nitrophenyl)(pyrrolo[1,2-a]quinoxalin-4-yl)methanone 3af**

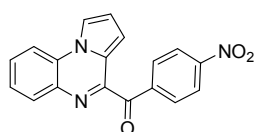

The title compound **3af** was prepared according to general procedure 3. A purification by flash chromatography in petroleum ether : ethyl acetate : dichloromethane = 5 : 1 : 1 gave **3af** as a Yellow solid (0.130 g, 82%). <sup>1</sup>H NMR (300 M, CD<sub>2</sub>Cl<sub>2</sub>): δ 8.38-8.32 (4H, m), 8.15 (1H, *J* = 1.2, 2.7 Hz, dd), 8.05-8.00 (2H, m), 7.75-7.69 (1H, m), 7.58-7.52 (1H, m), 7.45 (1H, *J* = 0.9, 4.2 Hz, dd), 7.07 (1H, *J* = 2.7, 3.9 Hz, dd); <sup>13</sup>C NMR (75 MHz, CD<sub>2</sub>Cl<sub>2</sub>): δ 191.10, 148.11, 141.88, 134.69, 132.34, 131.39, 130.76, 128.48, 126.10, 124.40, 123.52, 115.77, 115.68, 114.54, 109.78; HRMS calcd for  $C_{18}H_{11}N_3O_3$  ( $M+H$ )<sup>+</sup> 318.0873; found: 318.0857.

**(2-Fluorophenyl)(pyrrolo[1,2-a]quinoxalin-4-yl)methanone 3ag**

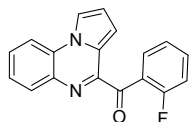

The title compound **3ag** was prepared according to general procedure 3. A purification by flash chromatography in petroleum ether : ethyl acetate : dichloromethane = 8 : 1 : 1 gave **3ag** as a Yellow solid (0.117 g, 81%). <sup>1</sup>H NMR (300 M, CDCl<sub>3</sub>): δ 8.04 (1H, *J* = 0.9, 2.7 Hz, dd), 7.97 (1H, *J* = 1.5, 2.1 Hz, dd), 7.91 (1H, *J* = 0.9, 8.1 Hz, dd), 7.88-7.83 (1H, m), 7.64-7.54 (2H, m), 7.48-7.41 (2H, m), 7.33-7.27 (1H, m), 7.17-7.11 (1H, m), 7.00 (1H, *J* = 2.7, 4.2 Hz, dd); <sup>13</sup>C NMR (75 MHz, CDCl<sub>3</sub>): δ 191.71, 161.54 (<sup>1</sup>*J*<sub>C,F</sub> = 258.8, d), 148.96, 134.78, 134.19 (<sup>3</sup>*J*<sub>C,F</sub> = 8.3, d), 131.67 (<sup>4</sup>*J*<sub>C,F</sub> = 2.3, d), 131.26, 129.84, 128.18, 126.29 (<sup>2</sup>*J*<sub>C,F</sub> = 12.8, d), 125.45, 124.10 (<sup>3</sup>*J*<sub>C,F</sub> = 3.8, d), 123.67, 116.30 (<sup>2</sup>*J*<sub>C,F</sub> = 21.8, d), 115.21, 114.79, 113.89, 109.06; HRMS calcd for  $C_{18}H_{11}FN_2O$  ( $M+H$ )<sup>+</sup> 291.0928; found: 291.0904.

**(4-Chlorophenyl)(pyrrolo[1,2-a]quinoxalin-4-yl)methanone 3ah**

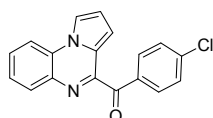

The title compound **3ah** was prepared according to general procedure 3. A purification by flash chromatography in petroleum ether : ethyl acetate : dichloromethane = 8 : 1 : 1 gave **3ah** as a Yellow solid (0.127 g, 83%). <sup>1</sup>H NMR (300 M, CDCl<sub>3</sub>): δ 8.16-8.12 (2H, m), 8.08-8.05 (2H, m), 7.94 (1H, *J* = 10.8 Hz, t), 7.68-7.62 (1H, m), 7.54-7.47 (3H, m), 7.29-7.26 (1H, m), 7.00 (1H, *J* = 2.7, 3.9 Hz, dd); <sup>13</sup>C NMR (75 MHz,

CDCl<sub>3</sub>):  $\delta$  190.79, 157.87, 149.01, 140.18, 134.27, 132.47, 130.93, 129.79, 128.70, 125.69, 115.26, 115.18, 113.96, 109.50; HRMS calcd for C<sub>18</sub>H<sub>11</sub>ClN<sub>2</sub>O (M+H)<sup>+</sup> 307.0633; found: 307.0607.

**Benzo[d][1,3]dioxol-5-yl(pyrrolo[1,2-a]quinoxalin-4-yl)methanone 3ai**

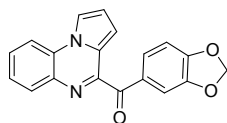

The title compound **3ai** was prepared according to general procedure 3. A purification by flash chromatography in petroleum ether : ethyl acetate : dichloromethane = 8 : 1 : 1 gave **3ai** as a Yellow solid (0.135 g, 86%). <sup>1</sup>H NMR (300 M, CDCl<sub>3</sub>):  $\delta$  8.04 (2H, *J* = 1.2, 8.4 Hz, dd), 7.92 (1H, *J* = 0.9, 8.1 Hz, dd), 7.79 (1H, *J* = 1.5, 8.1 Hz, dd), 7.69 (1H, *J* = 1.5 Hz, d), 7.65-7.59 (1H, m), 7.52-7.46 (1H, m), 7.13 (1H, *J* = 1.2, 4.2 Hz, dd), 6.95 (1H, *J* = 3.0, 4.2 Hz, dd), 6.88 (1H, *J* = 8.4 Hz, d), 6.07 (2H, s); <sup>13</sup>C NMR (75 MHz, CDCl<sub>3</sub>):  $\delta$  190.35, 152.54, 150.54, 148.04, 134.74, 130.97, 130.28, 129.25, 128.33, 127.91, 125.48, 124.41, 114.83, 114.79, 113.87, 110.23, 108.85, 107.98, 101.93; HRMS calcd for C<sub>19</sub>H<sub>12</sub>N<sub>2</sub>O<sub>3</sub> (M+H)<sup>+</sup> 317.0921; found: 317.0897.

**Naphthalen-1-yl(pyrrolo[1,2-a]quinoxalin-4-yl)methanone 3aj**

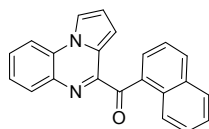

The title compound **3aj** was prepared according to general procedure 3. A purification by flash chromatography in petroleum ether : ethyl acetate : dichloromethane = 8 : 1 : 1 gave **3aj** as a Yellow solid (130 g, 81%). <sup>1</sup>H NMR (300 M, CDCl<sub>3</sub>):  $\delta$  8.62-8.58 (1H, m), 8.16 (1H, *J* = 1.2, 2.7 Hz, dd), 8.12 (1H, *J* = 8.1 Hz, d), 8.03-7.98 (2H, m), 7.95 (*J* = 1.2, 8.1 Hz, dd), 7.87 (*J* = 1.2, 7.2 Hz, dd), 7.71-7.60 (3H, m), 7.58-7.47 (2H, m), 7.40 (*J* = 1.2, 4.2 Hz, dd), 7.06 (*J* = 2.7, 3.9 Hz, dd); <sup>13</sup>C NMR (75 MHz, CD<sub>2</sub>Cl<sub>2</sub>):  $\delta$  194.75, 154.89, 150.42, 134.03, 133.87, 133.07, 131.60, 131.27, 130.64, 129.79, 128.56, 127.91, 126.49, 125.61, 124.25, 115.38, 115.17, 114.07, 109.46; HRMS calcd for C<sub>22</sub>H<sub>14</sub>N<sub>2</sub>O (M+H)<sup>+</sup> 323.1179; found: 323.1172.

**Naphthalen-2-yl(pyrrolo[1,2-a]quinoxalin-4-yl)methanone 3ak**

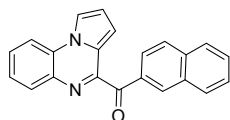

The title compound **3ak** was prepared according to general procedure 3. A purification by flash chromatography in petroleum ether : ethyl acetate : dichloromethane = 8 : 1 : 1 gave **3ak** as a Yellow solid (0.136 g, 85%). <sup>1</sup>H NMR (300 M, CDCl<sub>3</sub>):  $\delta$  8.69 (1H, s), 8.24 (1H, *J* = 1.8, 8.7 Hz, dd), 8.07-8.04 (2H, m), 7.97-7.89 (4H, m), 7.68-7.59 (2H, m), 7.56-7.48 (2H, m), 7.23 (1H, *J* = 1.2, 3.9 Hz, dd), 6.98 (1H, *J* = 2.7, 3.9 Hz, dd); <sup>13</sup>C NMR (75 MHz, CD<sub>2</sub>Cl<sub>2</sub>):  $\delta$  192.13, 150.14, 135.80, 134.76, 133.55, 133.36, 132.34, 130.85, 129.78, 129.46, 128.80, 128.11, 128.00, 127.74, 126.73, 125.49, 124.44, 115.07, 114.76, 114.03, 108.77; HRMS calcd for C<sub>22</sub>H<sub>14</sub>N<sub>2</sub>O (M+H)<sup>+</sup> 323.1179; found: 323.1176.

**Pyrrolo[1,2-a]quinoxalin-4-yl(thiophen-2-yl)methanone 3al**

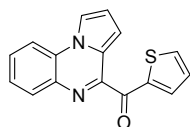

The title compound **3al** was prepared according to general procedure 3. A purification by flash chromatography in petroleum ether : ethyl acetate : dichloromethane = 8 : 1 : 1 gave **3al** as a Yellow solid

(0.118 g, 85%).  $^1\text{H}$  NMR (300 M,  $\text{CD}_2\text{Cl}_2$ ):  $\delta$  8.34 (1H,  $J$  = 1.2, 3.9 Hz, dd), 8.15 (1H,  $J$  = 1.2, 8.1 Hz, dd), 8.03 (1H,  $J$  = 0.9, 2.7 Hz, dd), 7.93 (1H,  $J$  = 0.9, 8.1 Hz, dd), 7.79 (1H,  $J$  = 1.2, 4.8 Hz, dd), 7.68-7.62 (1H, m), 7.60 (1H,  $J$  = 1.2, 4.2 Hz, dd), 7.55-7.49 (1H, m), 7.21 (1H,  $J$  = 3.9, 4.8 Hz, dd), 7.00 (1H,  $J$  = 3.0, 4.2 Hz, dd);  $^{13}\text{C}$  NMR (75 MHz,  $\text{CD}_2\text{Cl}_2$ ):  $\delta$  182.88, 147.89, 140.19, 136.61, 136.35, 134.39, 130.77, 129.96, 128.21, 127.50, 125.51, 123.75, 115.05, 114.96, 114.05, 109.60; HRMS calcd for  $\text{C}_{16}\text{H}_{10}\text{N}_2\text{OS}$  ( $\text{M}+\text{H}$ ) $^+$  279.0587; found: 279.0583.

**(7-Methoxypyrrolo[1,2-a]quinoxalin-4-yl)(phenyl)methanone 3ba**

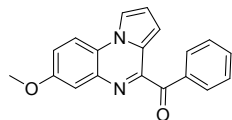

The title compound **3ba** was prepared according to general procedure 3. A purification by flash chromatography in petroleum ether : ethyl acetate : dichloromethane = 10 : 1 : 1 gave **3ba** as a Yellow solid (0.129 g, 86%).  $^1\text{H}$  NMR (300 M,  $\text{CD}_2\text{Cl}_2$ ):  $\delta$  8.12-8.10 (2H, m), 8.02 (1H,  $J$  = 1.5 Hz, d), 7.89 (1H,  $J$  = 9.0 Hz, d), 7.68-7.64 (1H, m), 7.55-7.47 (3H, m), 7.27 (1H,  $J$  = 2.7, 9.0 Hz, dd), 7.18 (1H,  $J$  = 0.9, 3.9 Hz, dd), 6.95 (1H,  $J$  = 2.7, 4.2 Hz, dd);  $^{13}\text{C}$  NMR (75 MHz,  $\text{CD}_2\text{Cl}_2$ ):  $\delta$  192.75, 157.84, 150.32, 136.61, 136.14, 133.79, 131.16, 128.67, 124.55, 122.66, 119.08, 115.33, 115.07, 114.88, 112.18, 108.77, 56.20; HRMS calcd for  $\text{C}_{19}\text{H}_{14}\text{N}_2\text{O}_2$  ( $\text{M}+\text{H}$ ) $^+$  303.1128; found: 303.1120.

**(7-Methoxypyrrolo[1,2-a]quinoxalin-4-yl)(p-tolyl)methanone 3bc**

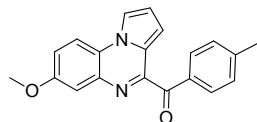

The title compound **3bc** was prepared according to general procedure 3. A purification by flash chromatography in petroleum ether : ethyl acetate : dichloromethane = 10 : 1 : 1 gave **3bc** as a Yellow solid (0.129 g, 82%).  $^1\text{H}$  NMR (300 M,  $\text{CD}_2\text{Cl}_2$ ):  $\delta$  8.03-8.00 (3H, m), 7.88 (1H,  $J$  = 9.0 Hz, d), 7.47 (1H,  $J$  = 2.7 Hz, d), 7.33 (2H,  $J$  = 8.1 Hz, d), 7.25 (1H,  $J$  = 2.7, 9.0 Hz, dd), 7.13 (1H,  $J$  = 1.2, 4.2 Hz, dd), 6.93 (1H,  $J$  = 2.7, 4.2 Hz, dd);  $^{13}\text{C}$  NMR (75 MHz,  $\text{CD}_2\text{Cl}_2$ ):  $\delta$  192.31, 157.82, 150.77, 145.12, 136.14, 133.90, 131.24, 129.42, 124.57, 122.62, 118.87, 115.31, 115.06, 114.80, 112.13, 108.72, 56.19, 21.91; HRMS calcd for  $\text{C}_{20}\text{H}_{16}\text{N}_2\text{O}_2$  ( $\text{M}+\text{H}$ ) $^+$  317.1285; found: 317.1286.

**(4-Fluorophenyl)(7-methoxypyrrolo[1,2-a]quinoxalin-4-yl)methanone 3be**

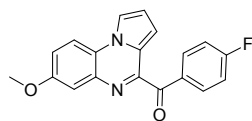

The title compound **3be** was prepared according to general procedure 3. A purification by flash chromatography in petroleum ether : ethyl acetate : dichloromethane = 10 : 1 : 1 gave **3be** as a Yellow solid (0.137 g; 86%).  $^1\text{H}$  NMR (300 M,  $\text{CD}_2\text{Cl}_2$ ):  $\delta$  8.21 (2H,  $J$  = 2.7, 8.7 Hz, dd), 8.02 (1H,  $J$  = 1.2 Hz, d), 7.89 (1H,  $J$  = 9.0 Hz, d), 7.47 (1H,  $J$  = 2.7 Hz, d), 7.29-7.18 (4H, m), 6.97-6.95 (1H, m), 3.92 (1H, s);  $^{13}\text{C}$  NMR (75 MHz,  $\text{CD}_2\text{Cl}_2$ ):  $\delta$  191.03, 167.09 ( $^1J_{\text{C,F}}$  = 253.5, d), 157.86, 149.98, 136.07, 134.04 ( $^3J_{\text{C,F}}$  = 9.8, d), 132.93 ( $^4J_{\text{C,F}}$  = 3.0, d), 124.50, 122.67, 119.17, 115.77 ( $^2J_{\text{C,F}}$  = 21.8, d), 115.35, 115.11, 114.93, 112.20, 108.83, 56.20; HRMS calcd for  $\text{C}_{19}\text{H}_{13}\text{FN}_2\text{O}_2$  ( $\text{M}+\text{H}$ ) $^+$  321.1034; found: 321.1033.

**(7-Methylpyrrolo[1,2-a]quinoxalin-4-yl)(phenyl)methanone 3ca**

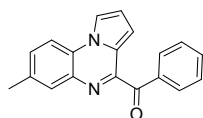

The title compound **3ca** was prepared according to general procedure 3. A purification by flash

chromatography in petroleum ether : ethyl acetate : dichloromethane = 8 : 1 : 1 gave **3ca** as a Yellow solid (0.121 g, 85%). <sup>1</sup>H NMR (300 M, CD<sub>2</sub>Cl<sub>2</sub>): δ 8.14-8.10 (2H, m), 8.05 (1H, *J* = 1.5, 2.7 Hz, dd), 7.87 (1H, *J* = 8.7 Hz, d), 7.81 (1H, *J* = 0.6 Hz, d), 7.68-7.63 (1H, m), 7.54-7.47 (3H, m), 7.20 (1H, *J* = 1.2, 4.2 Hz, dd), 6.96 (1H, *J* = 2.4, 3.9 Hz, dd), 2.51 (3H, s); <sup>13</sup>C NMR (75 MHz, CD<sub>2</sub>Cl<sub>2</sub>): δ 192.74, 149.99, 136.62, 136.00, 134.96, 133.74, 131.18, 131.12, 130.89, 128.61, 126.22, 124.67, 115.16, 114.91, 114.11, 108.89, 21.10; HRMS calcd for C<sub>19</sub>H<sub>14</sub>N<sub>2</sub>O (M+H)<sup>+</sup> 287.1179; found: 287.1184.

**(7-Chloropyrrolo[1,2-a]quinoxalin-4-yl)(phenyl)methanone 3da**

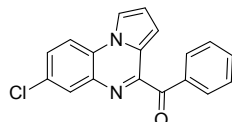

The title compound **3da** was prepared according to general procedure 3. A purification by flash chromatography in petroleum ether : ethyl acetate : dichloromethane = 8 : 1 : 1 gave **3da** as a Yellow solid (0.119 g, 78%). <sup>1</sup>H NMR (300 M, CD<sub>2</sub>Cl<sub>2</sub>): δ 8.13-8.10 (4H, m), 8.06 (2H, *J* = 0.9, 2.4 Hz, dd), 7.99-7.99 (2H, *J* = 0.9, 2.4 Hz, d), 7.91 (2H, *J* = 9.0 Hz, d), 7.69-7.64 (2H, m), 7.60 (2H, *J* = 2.4, 8.7 Hz, dd), 7.55-7.50 (4H, m), 7.22 (2H, *J* = 0.9, 3.9 Hz, dd), 7.00 (2H, *J* = 2.7, 3.9 Hz, dd); <sup>13</sup>C NMR (75 MHz, CD<sub>2</sub>Cl<sub>2</sub>): δ 192.34, 151.14, 136.22, 136.02, 134.00, 131.18, 130.90, 130.39, 129.74, 128.71, 127.04, 124.68, 115.88, 115.73, 115.57, 109.80; HRMS calcd for C<sub>18</sub>H<sub>11</sub>ClN<sub>2</sub>O (M+H)<sup>+</sup> 307.0633; found: 307.0610.

**(7-Chloropyrrolo[1,2-a]quinoxalin-4-yl)(4-methoxyphenyl)methanone 3db**

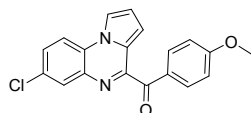

The title compound **3db** was prepared according to general procedure 3. A purification by flash chromatography in petroleum ether : ethyl acetate : dichloromethane = 8 : 1 : 1 gave **3db** as a Yellow solid (0.129 g, 77%). <sup>1</sup>H NMR (300 M, CD<sub>2</sub>Cl<sub>2</sub>): δ 8.05-8.01 (2H, m), 7.96 (1H, *J* = 0.9, 2.4 Hz, dd), 7.92 (1H, *J* = 2.4 Hz, d), 7.82 (1H, *J* = 9.0 Hz, d), 7.51 (H, *J* = 2.4, 9.0 Hz, dd), 7.05 (1H, *J* = 1.2, 4.2 Hz, dd), 6.93-6.88 (3H, m), 3.81(3H, s); <sup>13</sup>C NMR (75 MHz, CD<sub>2</sub>Cl<sub>2</sub>): δ 190.63, 164.73, 151.95, 136.05, 133.58, 130.86, 130.22, 129.47, 128.83, 126.99, 124.74, 115.87, 115.71, 115.44, 114.09, 109.74, 56.00; HRMS calcd for C<sub>19</sub>H<sub>13</sub>ClN<sub>2</sub>O<sub>2</sub> (M+H)<sup>+</sup> 337.0738; found: 337.0730.

**(7-Chloropyrrolo[1,2-a]quinoxalin-4-yl)(p-tolyl)methanone 3dc**

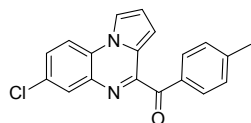

The title compound **3dc** was prepared according to general procedure 3. A purification by flash chromatography in petroleum ether : ethyl acetate : dichloromethane = 8 : 1 : 1 gave **3dc** as a Yellow solid (0.123 g, 77%). <sup>1</sup>H NMR (300 M, CD<sub>2</sub>Cl<sub>2</sub>): δ 8.08 (1H, *J* = 1.2, 2.7 Hz, dd), 8.06-8.02 (3H, m), 7.94 (1H, *J* = 9.0 Hz, d), 7.63 (1H, *J* = 2.4, 8.7 Hz, dd), 7.36 (2H, *J* = 7.8 Hz, d), 7.20 (1H, *J* = 1.2, 3.9 Hz, dd), 7.02 (1H, *J* = 2.7, 3.9 Hz, dd); <sup>13</sup>C NMR (75 MHz, CD<sub>2</sub>Cl<sub>2</sub>): δ 191.90, 151.60, 145.37, 136.06, 133.55, 131.25, 130.87, 130.31, 129.58, 129.47, 127.02, 124.70, 115.84, 115.71, 115.48, 109.73, 21.92; HRMS calcd for C<sub>19</sub>H<sub>13</sub>ClN<sub>2</sub>O (M+H)<sup>+</sup> 321.0789; found: 321.0762.

**(7-Chloropyrrolo[1,2-a]quinoxalin-4-yl)(4-fluorophenyl)methanone 3de**

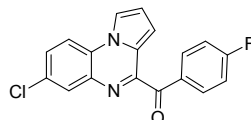



The title compound **3de** was prepared according to general procedure 3. A purification by flash chromatography in petroleum ether : ethyl acetate : dichloromethane = 8 : 1 : 1 gave **3de** as a Yellow solid (0.126 g, 78%). <sup>1</sup>H NMR (300 M, CD<sub>2</sub>Cl<sub>2</sub>): δ 8.24-8.18 (4H, m), 8.07 (2H, *J* = 1.2, 2.7 Hz, dd), 8.01 (2H, *J* = 2.4 Hz, d), 7.93 (2H, *J* = 8.7 Hz, d), 7.62 (2H, *J* = 2.1, 8.7 Hz, dd), 7.26-7.17 (6H, m), 7.01 (2H, *J* = 3.0, 4.2 Hz, dd); <sup>13</sup>C NMR (75 MHz, CD<sub>2</sub>Cl<sub>2</sub>): δ 190.61, 166.51 (<sup>1</sup>*J*<sub>C,F</sub> = 253.5, d), 150.78, 135.91, 134.12, 133.99, 132.59 (<sup>4</sup>*J*<sub>C,F</sub> = 3.0, d), 130.96, 130.13 (<sup>2</sup>*J*<sub>C,F</sub> = 37.5, d), 127.06, 124.62, 115.98, 115.71 (<sup>3</sup>*J*<sub>C,F</sub> = 8.3, d), 115.69, 109.93; HRMS calcd for C<sub>18</sub>H<sub>10</sub>ClFN<sub>2</sub>O (M+H)<sup>+</sup> 325.0539; found: 325.0549.

**(7-Chloropyrrolo[1,2-a]quinoxalin-4-yl)(furan-2-yl)methanone 3dm**

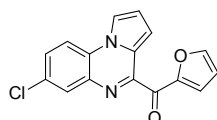

The title compound **3dm** was prepared according to general procedure 3. A purification by flash chromatography in petroleum ether : ethyl acetate : dichloromethane = 8 : 1 : 1 gave **3dm** as a Yellow solid (0.126 g, 85%). <sup>1</sup>H NMR (300 M, CD<sub>2</sub>Cl<sub>2</sub>): δ 8.06-8.04 (2H, m), 7.91 (1H, *J* = 3.3 Hz, t), 7.87 (1H, s), 7.81 (1H, s), 7.60 (1H, *J* = 2.1, 9.0 Hz, dd), 7.48 (1H, *J* = 3.6 Hz, d), 7.02-7.00 (1H, m), 6.67 (1H, *J* = 1.8 Hz, d); <sup>13</sup>C NMR (75 MHz, CD<sub>2</sub>Cl<sub>2</sub>): δ 191.17, 185.01, 178.50, 151.49, 149.45, 148.67, 135.95, 130.90, 130.47, 130.05, 127.24, 124.62, 124.19, 115.82, 112.90, 110.38; HRMS calcd for C<sub>16</sub>H<sub>9</sub>ClN<sub>2</sub>O<sub>2</sub> (M+H)<sup>+</sup> 297.0425; found: 297.0405.

**Imidazo[1,5-a]quinoxalin-4-yl(phenyl)methanone 3ea**

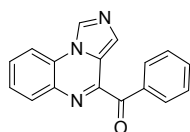

The title compound **3ea** was prepared according to general procedure 3. A purification by flash chromatography in petroleum ether : ethyl acetate : dichloromethane = 5 : 1 : 1 gave **3ea** as a Yellow solid (0.114 g, 84%). <sup>1</sup>H NMR (300 M, CD<sub>2</sub>Cl<sub>2</sub>): δ 8.79 (1H, s), 8.23-8.19 (3H, m), 8.07-8.02 (2H, m), 7.75-7.58 (3H, m), 7.57-7.52 (2H, m); <sup>13</sup>C NMR (75 MHz, CD<sub>2</sub>Cl<sub>2</sub>): δ 191.51, 149.79, 136.07, 135.34, 133.89, 131.70, 131.35, 131.11, 129.84, 129.29, 128.67, 127.63, 125.85, 122.91, 114.96; HRMS calcd for C<sub>17</sub>H<sub>11</sub>N<sub>3</sub>O (M+H)<sup>+</sup> 274.0975; found: 274.0959.

**Imidazo[1,5-a]quinoxalin-4-yl(naphthalen-2-yl)methanone 3ej**

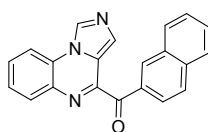

The title compound **3ej** was prepared according to general procedure 3. A purification by flash chromatography in petroleum ether : ethyl acetate : dichloromethane = 5 : 1 : 1 gave **3ej** as a Yellow solid (0.135 g, 84%). <sup>1</sup>H NMR (300 M, CD<sub>2</sub>Cl<sub>2</sub>): δ 8.72 (2H, *J* = 4.2 Hz, d), 8.17-8.10 (2H, m), 8.02-7.96 (2H, m), 7.92-7.85 (3H, m), 7.68-7.63 (1H, m), 7.60-7.46 (3H, m); <sup>13</sup>C NMR (75 MHz, CD<sub>2</sub>Cl<sub>2</sub>): δ 191.31, 150.14, 136.17, 135.42, 134.13, 133.29, 132.69, 131.76, 131.09, 130.25, 129.85, 129.31, 129.25, 128.52, 128.15, 127.66, 127.19, 126.07, 125.86, 114.99; HRMS calcd for C<sub>21</sub>H<sub>13</sub>N<sub>3</sub>O (M+H)<sup>+</sup> 324.1131; found: 324.1136.

**(1-Methylimidazo[1,5-a]quinoxalin-4-yl)(phenyl)methanone 3fa**

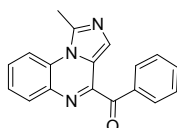

The title compound **3fa** was prepared according to general procedure 3. A purification by flash chromatography in petroleum ether : ethyl acetate : dichloromethane = 5 : 1 : 1 gave **3fa** as a Yellow solid (0.126 g, 88%). <sup>1</sup>H NMR (300 M, CD<sub>2</sub>Cl<sub>2</sub>): δ 8.30 (1H, *J* = 0.6, 8.4 Hz, dd), 8.21-8.19 (2H, m), 8.07-8.04 (2H, m), 7.73-7.68 (2H, m), 7.63-7.54 (3H, m), 3.16 (3H, s); <sup>13</sup>C NMR (75 MHz, CD<sub>2</sub>Cl<sub>2</sub>): δ 191.69, 150.21, 142.64, 136.45, 136.14, 133.89, 131.55, 131.27, 130.20, 128.66, 128.04, 127.56, 126.94, 124.33, 116.23, 19.01; HRMS calcd for C<sub>18</sub>H<sub>13</sub>N<sub>3</sub>O (M+H)<sup>+</sup> 288.1131; found: 288.1149.

**(1-Methylimidazo[1,5-a]quinoxalin-4-yl)(p-tolyl)methanone 3fc**

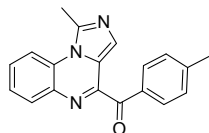

The title compound **3fc** was prepared according to general procedure 3. A purification by flash chromatography in petroleum ether : ethyl acetate : dichloromethane = 5 : 1 : 1 gave **3fc** as a Yellow solid (0.129 g, 86%). <sup>1</sup>H NMR (300 M, CD<sub>2</sub>Cl<sub>2</sub>): δ 8.31 (1H, *J* = 1.2, 8.4 Hz, dd), 8.12-8.09 (2H, m), 8.06 (1H, *J* = 1.8, 8.1 Hz, dd), 7.99 (1H, s), 7.74-7.68 (1H, m), 7.64-7.58 (1H, m), 7.37 (2H, *J* = 8.1 Hz, d), 3.16 (3H, s), 2.50 (3H, s); <sup>13</sup>C NMR (75 MHz, CD<sub>2</sub>Cl<sub>2</sub>): δ 191.26, 150.63, 145.25, 142.59, 136.51, 133.45, 131.49, 131.36, 130.05, 129.42, 128.01, 127.37, 126.94, 124.38, 116.23, 21.91, 18.96; HRMS calcd for C<sub>19</sub>H<sub>15</sub>N<sub>3</sub>O (M+H)<sup>+</sup> 302.1288; found: 302.1289.

**(4-Fluorophenyl)(1-methylimidazo[1,5-a]quinoxalin-4-yl)methanone 3fe**

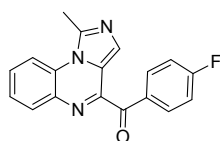

The title compound **3fe** was prepared according to general procedure 3. A purification by flash chromatography in petroleum ether : ethyl acetate : dichloromethane = 5 : 1 : 1 gave **3fe** as a Yellow solid (0.126 g, 83%). <sup>1</sup>H NMR (300 M, CD<sub>2</sub>Cl<sub>2</sub>): δ 8.35-8.28 (3H, m), 8.09-8.05 (2H, m), 7.76-7.70 (1H, m), 7.65-7.59 (1H, m), 7.29-7.22 (2H, m), 3.17 (3H, s); <sup>13</sup>C NMR (75 MHz, CD<sub>2</sub>Cl<sub>2</sub>): δ 189.91, 166.46 (<sup>1</sup>*J*<sub>C,F</sub> = 253.5, d), 149.96, 142.67, 136.38, 134.25 (<sup>3</sup>*J*<sub>C,F</sub> = 9.8, d), 132.54 (<sup>4</sup>*J*<sub>C,F</sub> = 3.0, d), 131.58, 130.34, 128.03, 127.54, 127.02, 124.24, 116.26, 115.92, 115.63 (<sup>2</sup>*J*<sub>C,F</sub> = 21.8, d), 18.94; HRMS calcd for C<sub>18</sub>H<sub>12</sub>FN<sub>3</sub>O (M+H)<sup>+</sup> 306.1037; found: 306.1036.

**(3-Methylimidazo[1,5-a]quinoxalin-4-yl)(phenyl)methanone 3ga**

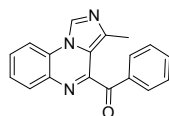

The title compound **3ga** was prepared according to general procedure 3. A purification by flash chromatography in petroleum ether : ethyl acetate : dichloromethane = 5 : 1 : 1 gave **3ga** as a Yellow solid (0.129 g, 90%). <sup>1</sup>H NMR (300 M, CD<sub>2</sub>Cl<sub>2</sub>): δ 8.68 (1H, s), 8.07-8.04 (2H, m), 7.99-7.93 (2H, m), 7.72-7.61 (2H, m), 7.58-7.51 (3H, m), 2.35 (3H, s); <sup>13</sup>C NMR (75 MHz, CD<sub>2</sub>Cl<sub>2</sub>): δ 192.23, 152.78, 137.95, 135.48, 135.34, 134.80, 130.89, 130.76, 129.84, 129.17, 128.68, 127.36, 125.89, 119.14, 114.63, 15.18; HRMS calcd for C<sub>18</sub>H<sub>13</sub>N<sub>3</sub>O (M+H)<sup>+</sup> 288.1131; found: 288.1125.

**(4-Methoxyphenyl)(3-methylimidazo[1,5-a]quinoxalin-4-yl)methanone 3gb**

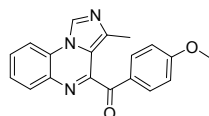

The title compound **3gb** was prepared according to general procedure 3. A purification by flash chromatography in petroleum ether : ethyl acetate : dichloromethane = 5 : 1 : 1 gave **3gb** as a Yellow solid (0.138 g, 87%). <sup>1</sup>H NMR (300 M, CD<sub>2</sub>Cl<sub>2</sub>): δ 8.70 (1H, s), 8.08-8.04 (2H, m), 8.01-7.96 (2H, m), 7.69-7.63 (1H, m), 7.60-7.55 (1H, m), 7.05-7.02 (2H, m), 3.93 (3H, s), 2.37 (3H, s); <sup>13</sup>C NMR (75 MHz, CD<sub>2</sub>Cl<sub>2</sub>): δ 190.78, 165.20, 153.22, 137.83, 135.46, 133.29, 130.69, 129.62, 128.59, 128.40, 127.31, 125.85, 119.14, 114.61, 114.50, 15.05; HRMS calcd for C<sub>19</sub>H<sub>15</sub>N<sub>3</sub>O<sub>2</sub> (M+H)<sup>+</sup> 318.1237; found: 318.1238.

**Indolo[1,2-a]quinoxalin-6-yl(phenyl)methanone 3ha**

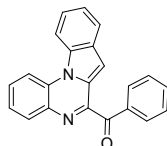

The title compound **3ha** was prepared according to general procedure 3. A purification by flash chromatography in petroleum ether : ethyl acetate : dichloromethane = 8 : 1 : 1 gave **3ha** as a Red solid (0.116 g, 72%). <sup>1</sup>H NMR (300 M, CD<sub>2</sub>Cl<sub>2</sub>): δ 8.63 (1H, *J* = 0.9, 8.4 Hz, dd), 8.57 (1H, *J* = 0.6, 8.7 Hz, dd), 8.22-8.18 (2H, m), 8.10-8.04 (2H, m), 7.83-7.77 (1H, m), 7.75-7.64 (2H, m), 7.60-7.51 (5H, m); <sup>13</sup>C NMR (75 MHz, CD<sub>2</sub>Cl<sub>2</sub>): δ 192.35, 152.10, 136.30, 135.19, 134.04, 133.13, 131.68, 131.47, 131.17, 130.85, 129.88, 128.78, 127.91, 125.17, 124.73, 123.50, 123.39, 115.38, 114.91, 102.64; HRMS calcd for C<sub>22</sub>H<sub>14</sub>N<sub>2</sub>O (M+H)<sup>+</sup> 323.1179; found: 323.1180.

**(7-Methylindolo[1,2-a]quinoxalin-6-yl)(phenyl)methanone 3ia**

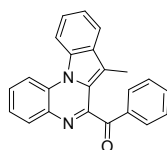

The title compound **3ia** was prepared according to general procedure 3. A purification by flash chromatography in petroleum ether : ethyl acetate : dichloromethane = 8 : 1 : 1 gave **3ia** as a Red solid (0.146 g, 81%). <sup>1</sup>H NMR (300 M, CD<sub>2</sub>Cl<sub>2</sub>): δ 8.55-8.49 (2H, m), 8.08-8.05 (2H, m), 7.97-7.93 (2H, m), 7.72-7.60 (3H, m), 7.56-7.41 (4H, m), 2.35 (3H, s); <sup>13</sup>C NMR (75 MHz, CD<sub>2</sub>Cl<sub>2</sub>): δ 193.40, 154.89, 135.80, 135.21, 134.78, 132.58, 131.44, 130.79, 130.75, 130.19, 129.84, 129.27, 125.47, 124.41, 124.35, 122.73, 121.23, 115.16, 114.75, 110.47, 10.15; HRMS calcd for C<sub>23</sub>H<sub>16</sub>N<sub>2</sub>O (M+H)<sup>+</sup> 337.1335; found: 337.1320.

**(4-Fluorophenyl)(7-methylindolo[1,2-a]quinoxalin-6-yl)methanone 3ie**

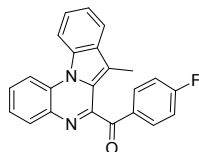

The title compound **3ie** was prepared according to general procedure 3. A purification by flash chromatography in petroleum ether : ethyl acetate : dichloromethane = 8 : 1 : 1 gave **3ie** as a Red solid (0.141 g, 80%). <sup>1</sup>H NMR (300 M, CD<sub>2</sub>Cl<sub>2</sub>): δ 8.54-8.48 (2H, m), 8.16-8.09 (2H, m), 7.95 (2H, *J* = 1.8, 8.1 Hz, dd), 7.72-7.60 (2H, m), 7.52-7.41 (2H, m), 7.25-7.17 (2H, m), 2.35 (3H, s); <sup>13</sup>C NMR (75 MHz, CD<sub>2</sub>Cl<sub>2</sub>): δ 191.73, 166.96 (<sup>1</sup>*J*<sub>C,F</sub> = 255.0, d), 154.44, 135.04, 133.76 (<sup>3</sup>*J*<sub>C,F</sub> = 9.8, d), 132.60, 132.31 (<sup>4</sup>*J*<sub>C,F</sub> = 3.0, d), 131.43, 130.75, 130.18, 129.96, 125.58, 124.39, 124.29, 122.79, 121.25, 116.50 (<sup>2</sup>*J*<sub>C,F</sub> = 21.8, d), 115.18, 114.75, 110.59, 10.17; HRMS calcd for C<sub>23</sub>H<sub>15</sub>FN<sub>2</sub>O (M+H)<sup>+</sup> 355.1241; found: 355.1243.

**(7-fluoropyrrolo[1,2-a]quinoxalin-4-yl)(phenyl)methanone 3la**

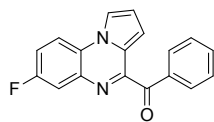

The title compound **3la** was prepared according to general procedure 3. A purification by flash chromatography in petroleum ether : ethyl acetate : dichloromethane = 8 : 1 : 1 gave **3la** as a yellow solid (0.109 g, 75%).  $^1\text{H}$  NMR (300 M,  $\text{CD}_2\text{Cl}_2$ ):  $\delta$  8.12-8.10 (3H, m), 8.07 (2H,  $J$  = 1.8, 2.7 Hz, dd), 7.95 (1H,  $J$  = 5.1, 9.3 Hz, dd), 7.71-7.64 (2H, m), 7.55-7.50 (2H, m), 7.44-7.37 (1H, m), 7.20 (1H,  $J$  = 1.2, 3.9 Hz, dd), 6.99 (1H,  $J$  = 2.7, 4.2 Hz, dd);  $^{13}\text{C}$  NMR (75 MHz,  $\text{CD}_2\text{Cl}_2$ ):  $\delta$  192.37, 160.30 ( $^1J_{\text{C,F}}$  = 242.3, d), 151.23, 136.23, 136.20 ( $^3J_{\text{C,F}}$  = 11.3, d), 134.02, 131.14, 128.73, 125.08, 124.59, 117.54 ( $^2J_{\text{C,F}}$  = 24.0, d), 116.14 ( $^2J_{\text{C,F}}$  = 22.5, d), 115.84, 115.71, 115.35, 109.64; HRMS calcd for  $\text{C}_{18}\text{H}_{11}\text{FN}_2\text{O}$  ( $\text{M}+\text{H}$ ) $^+$  291.0928; found: 291.0911.

## 5. References

1. Patil, N. T.; Kavthe, R. D.; Shinde, V. S.; Sridhar, B. *J. Org. Chem.*, **2010**, 10, 3371.
2. Verma, A. K.; Jha, R. R.; Sankar, V. K.; Aggarwal, T.; Singh, R. P.; Chandra, R. *Eur. J. Org. Chem.*, **2011**, 6998.
3. Kelly, T. R.; Cavero, M. *Org. Lett.*, **2002**, 16, 2653.

## 6. HRMS, $^1\text{H}$ NMR and $^{13}\text{C}$ NMR spectra

Phenyl(pyrrolo[1,2-a]quinoxalin-4-yl)methanone (**3aa**).

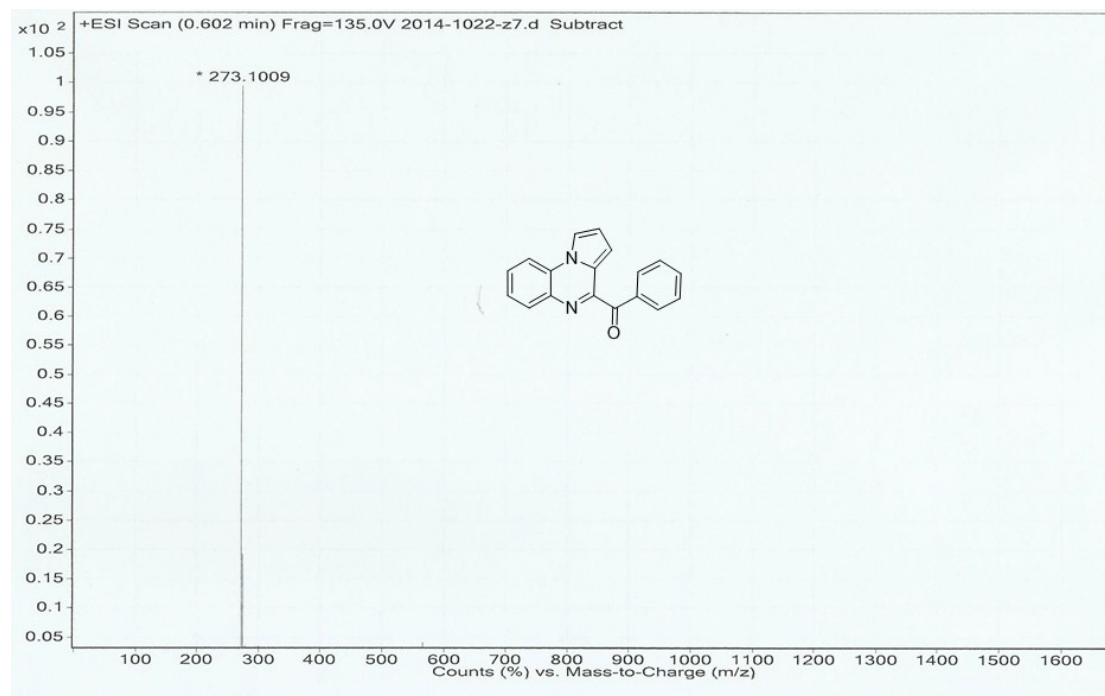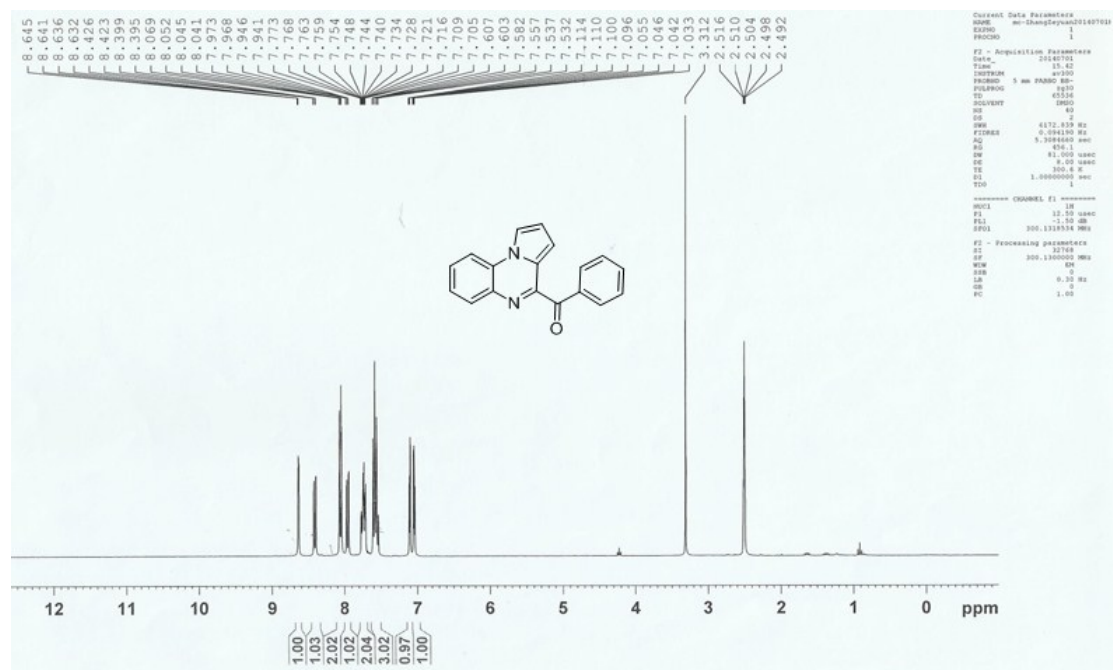

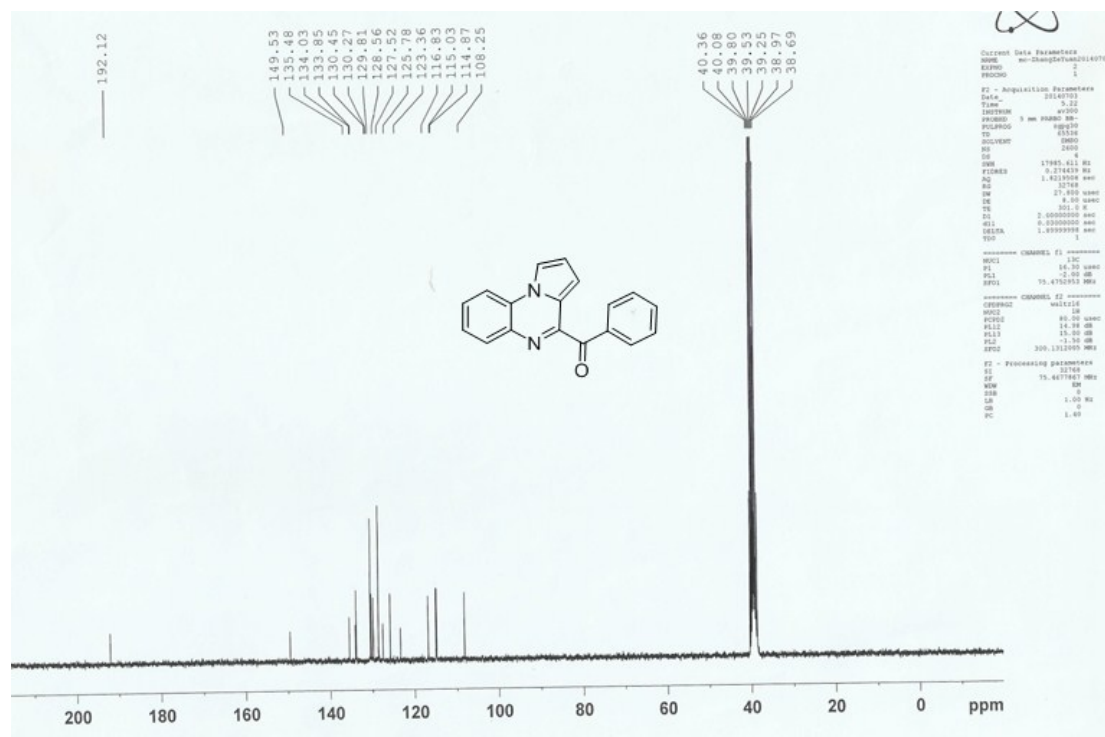

(4-Methoxyphenyl)(pyrrolo[1,2-a]quinoxalin-4-yl)methanone (**3ab**).

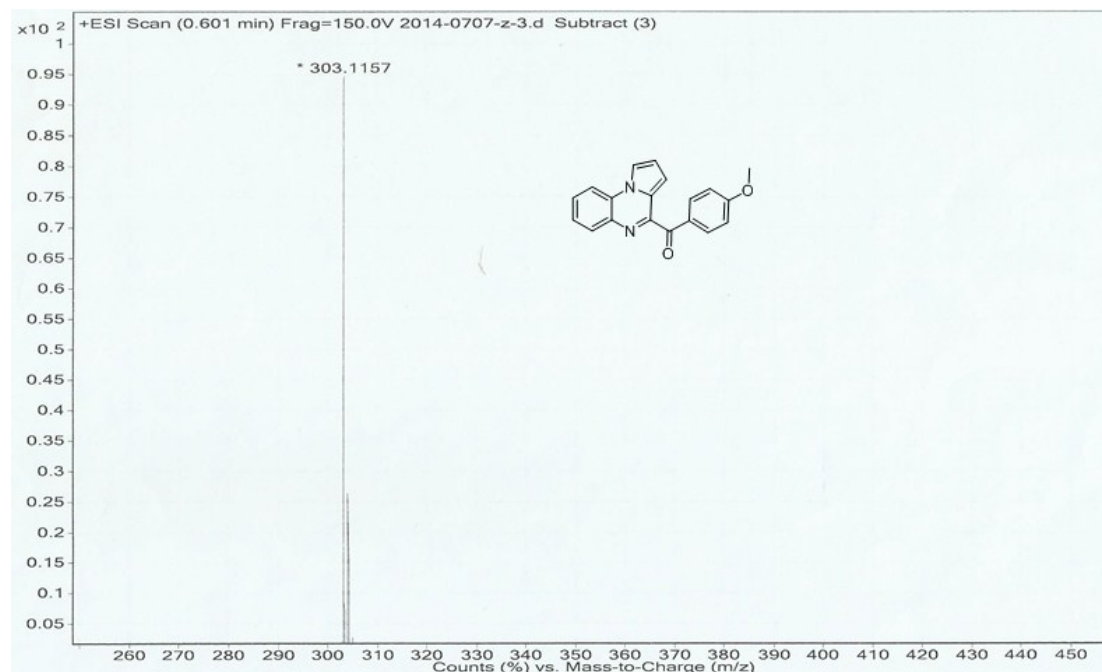



Pyrrolo[1,2-a]quinoxalin-4-yl(p-tolyl)methanone (**3ac**).

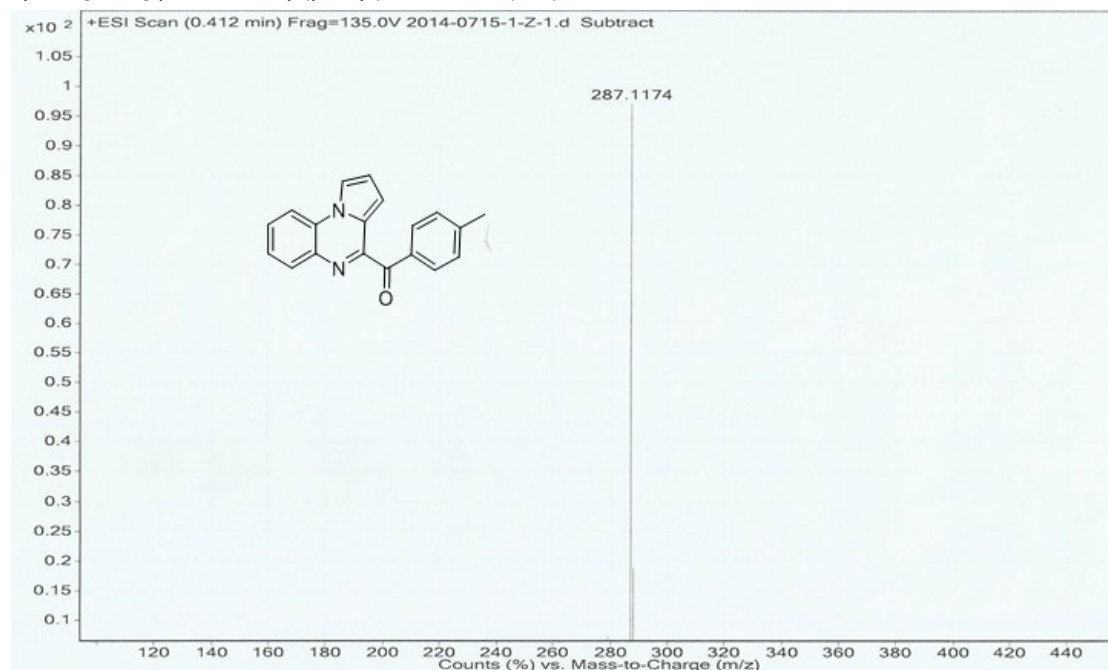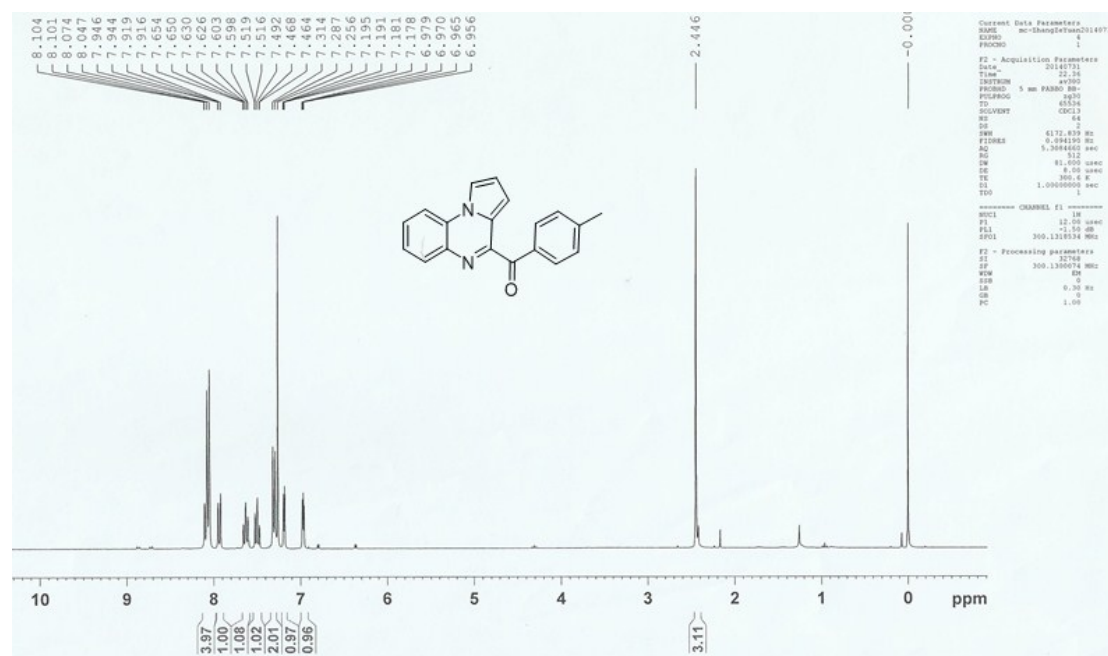



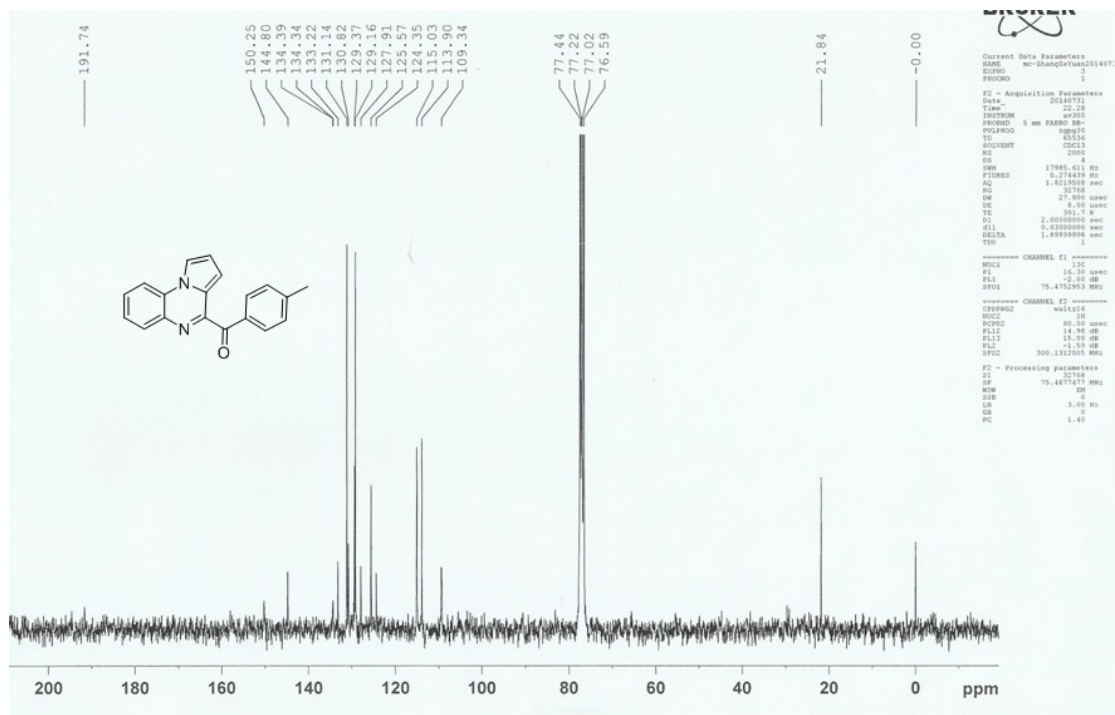

Pyrrolo[1,2-a]quinoxalin-4-yl(o-tolyl)methanone (**3ad**).

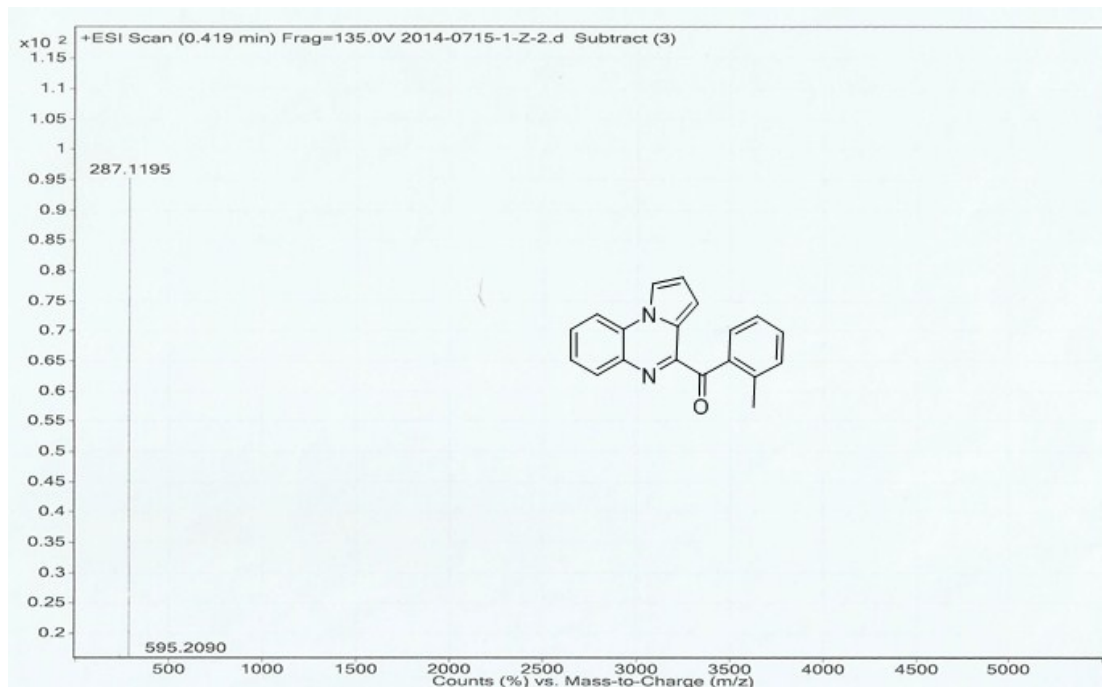

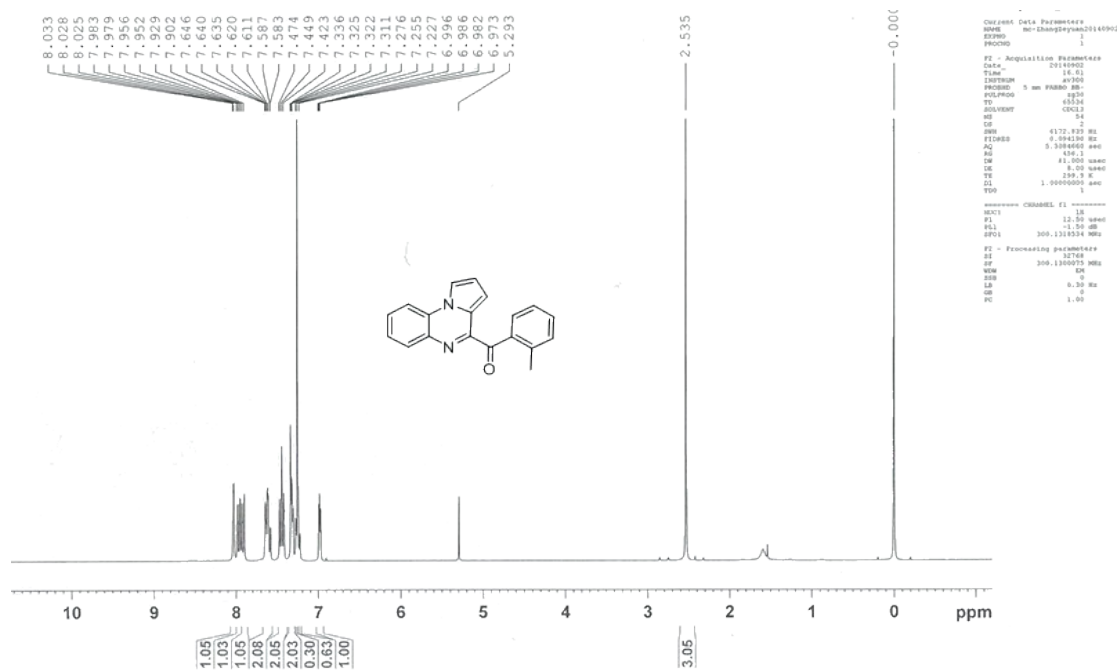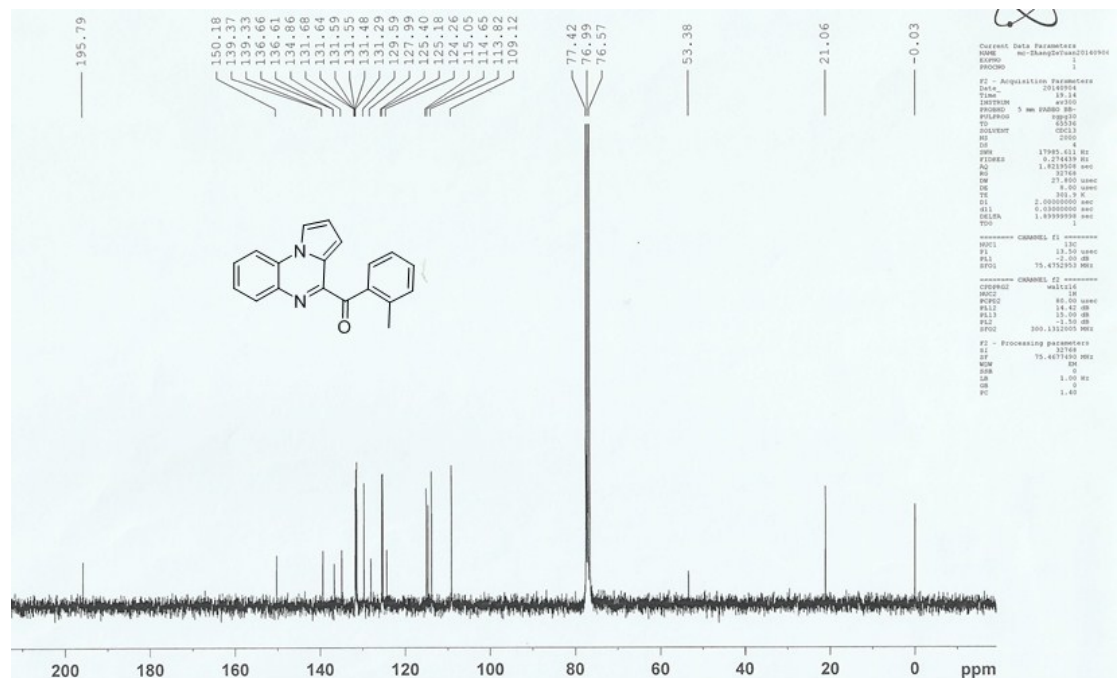

Chemical structure of the compound is shown: O=C(c1ccc(F)cc1)c2nc3ccccc3n2C4=CC=CC=C4

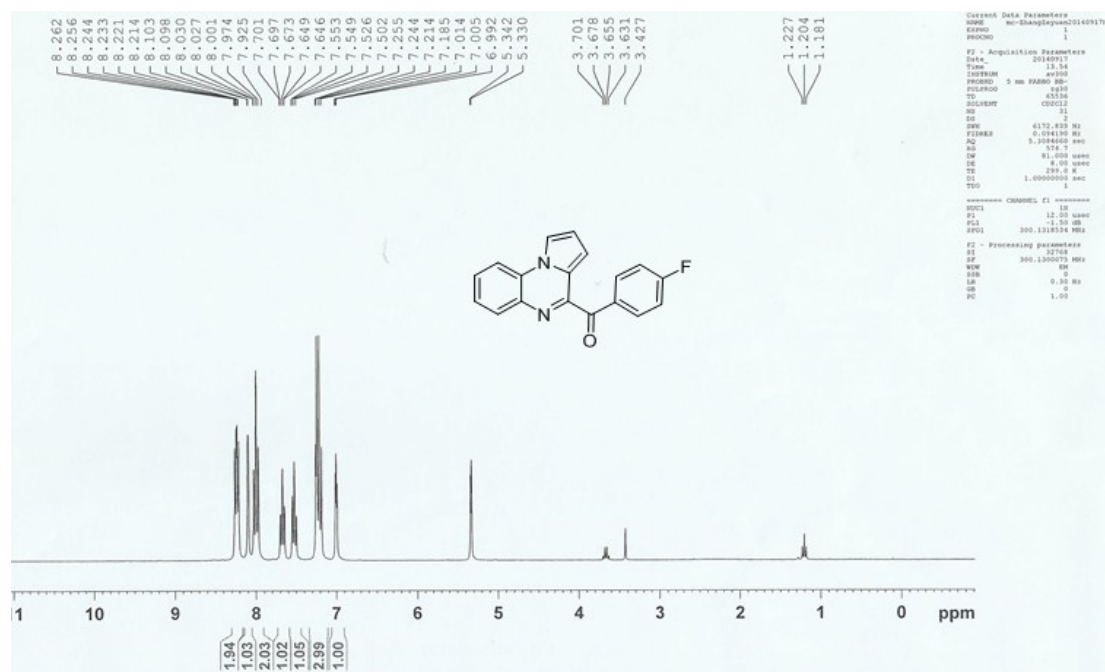

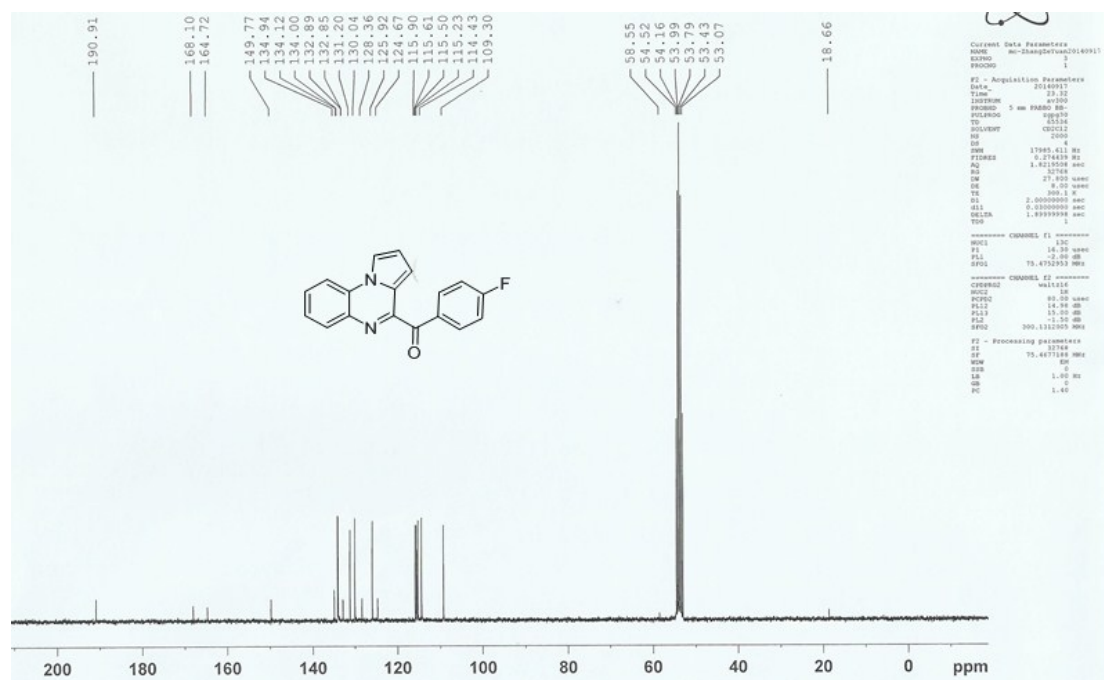

(4-Nitrophenyl)(pyrrolo[1,2-a]quinoxalin-4-yl)methanone (**3af**).

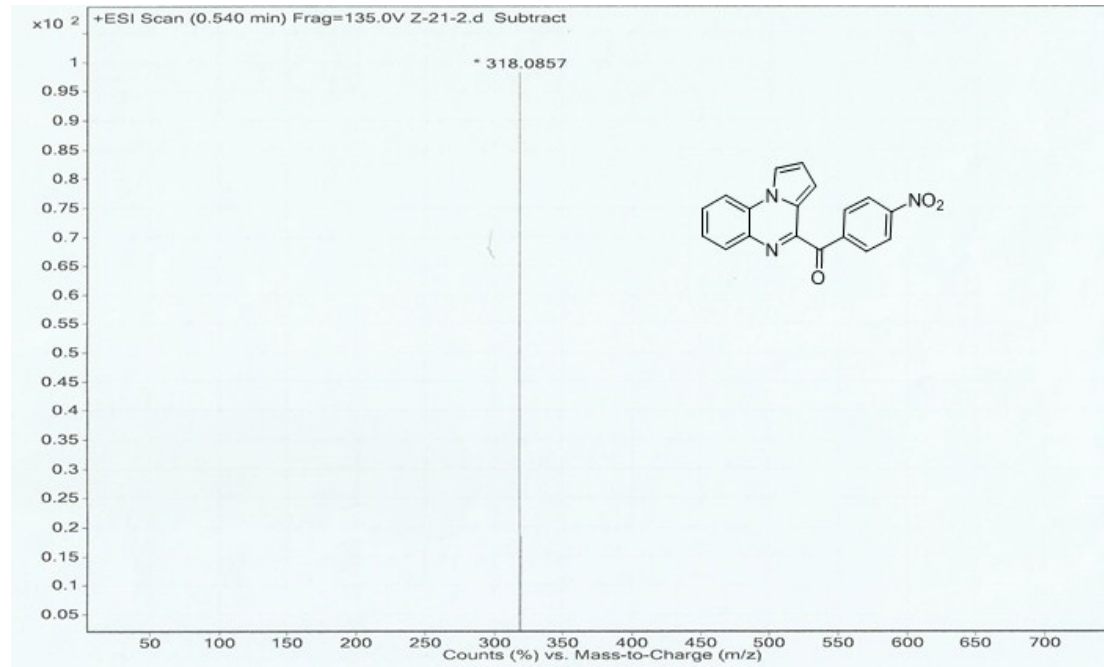

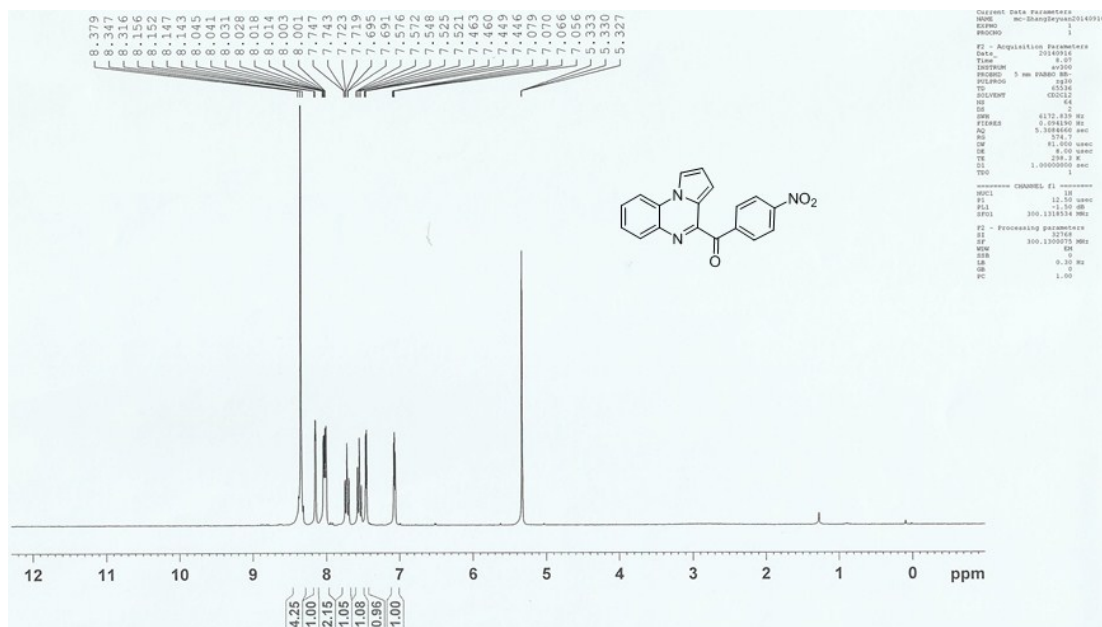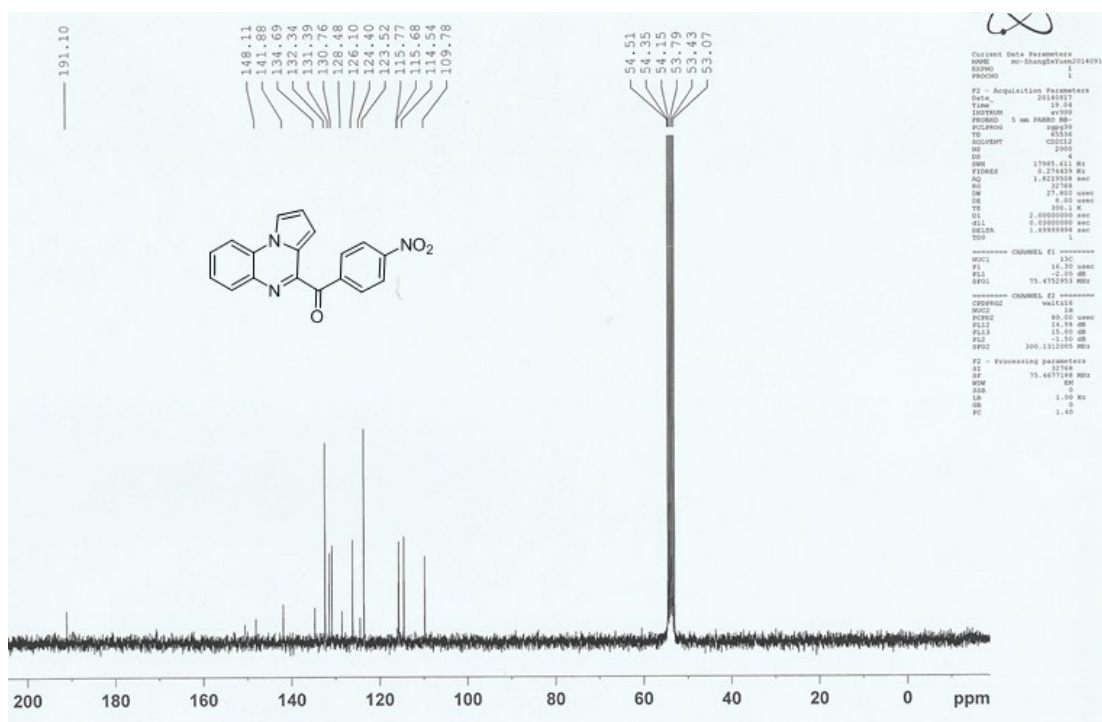

(2-Fluorophenyl)(pyrrolo[1,2-a]quinoxalin-4-yl)methanone (**3ag**).

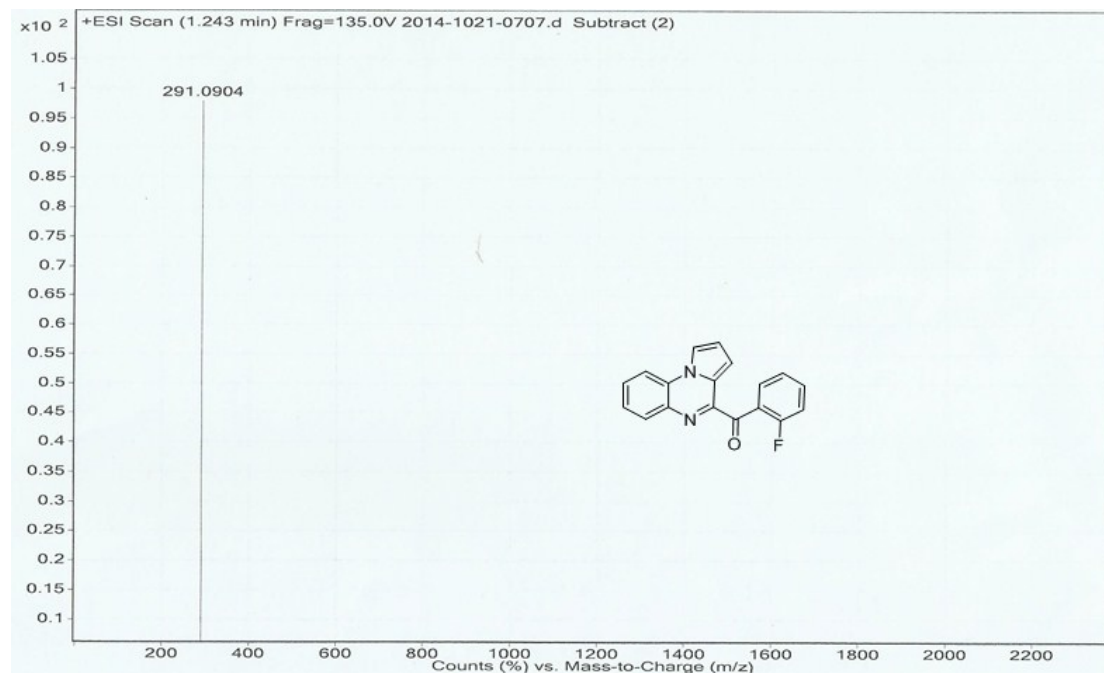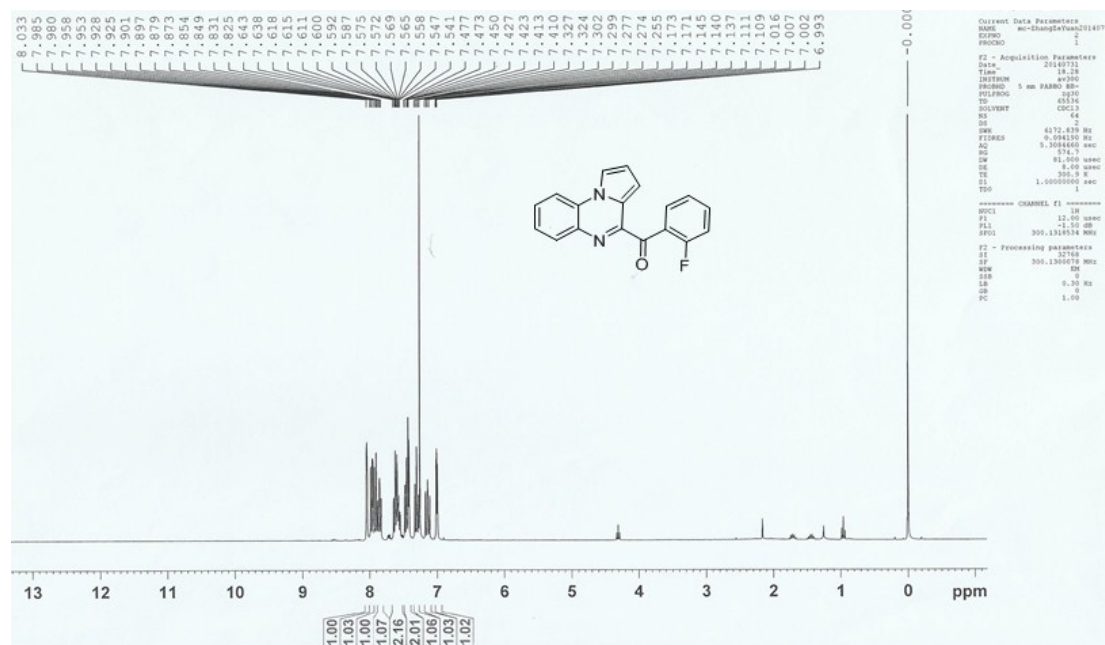



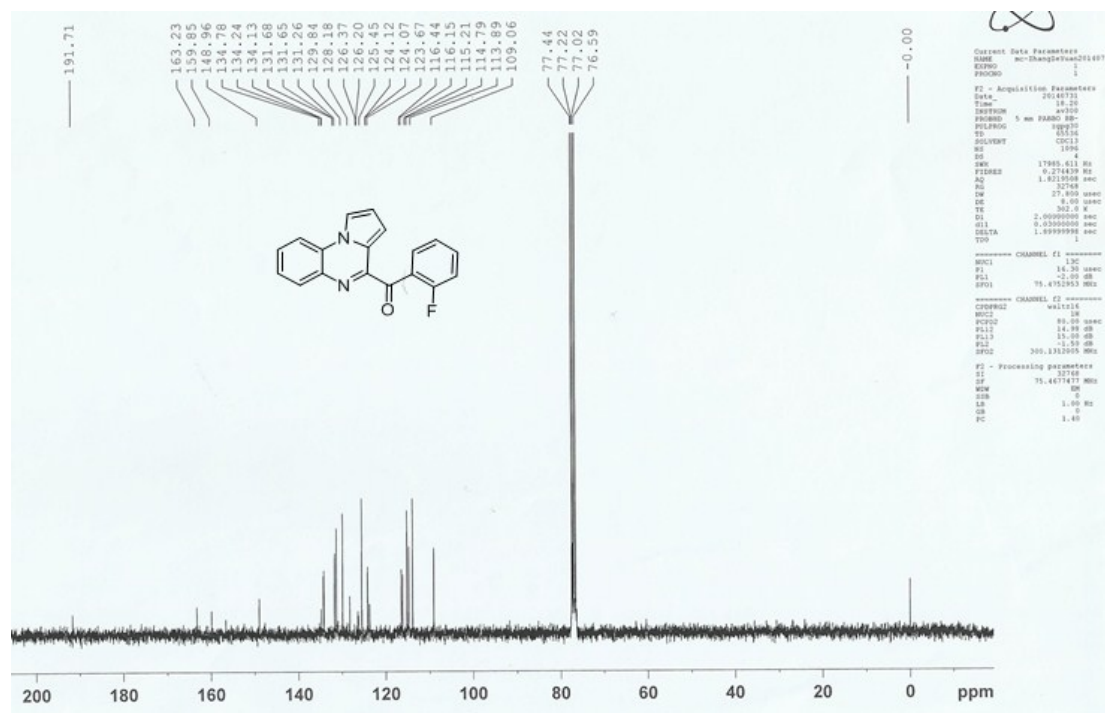

(4-Chlorophenyl)(pyrrolo[1,2-a]quinoxalin-4-yl)methanone (**3ah**).

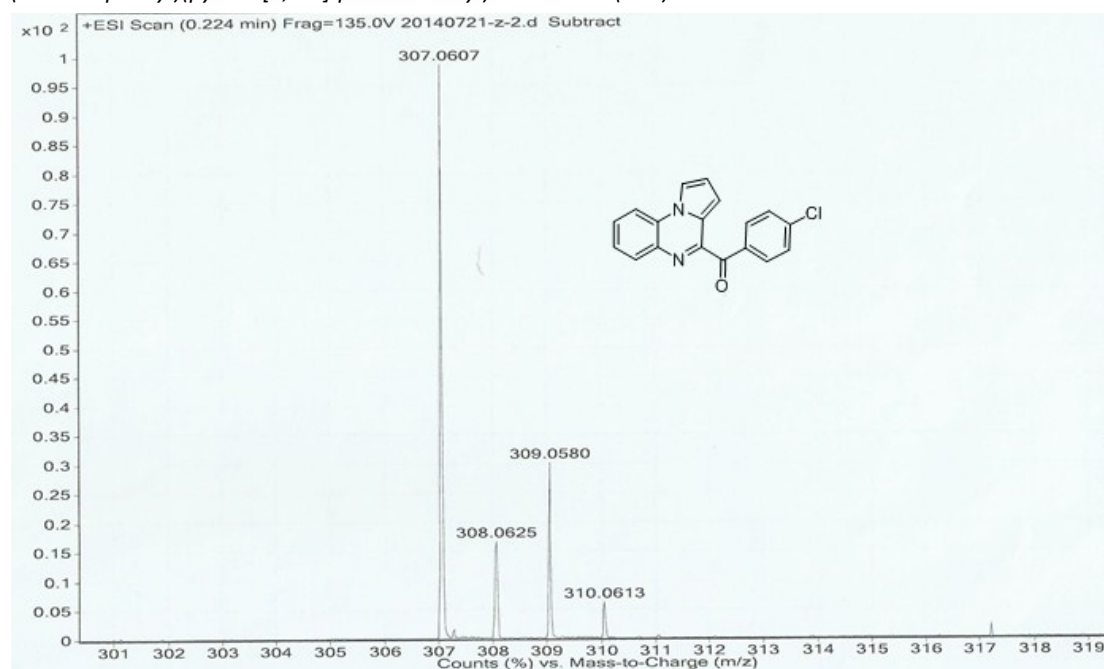

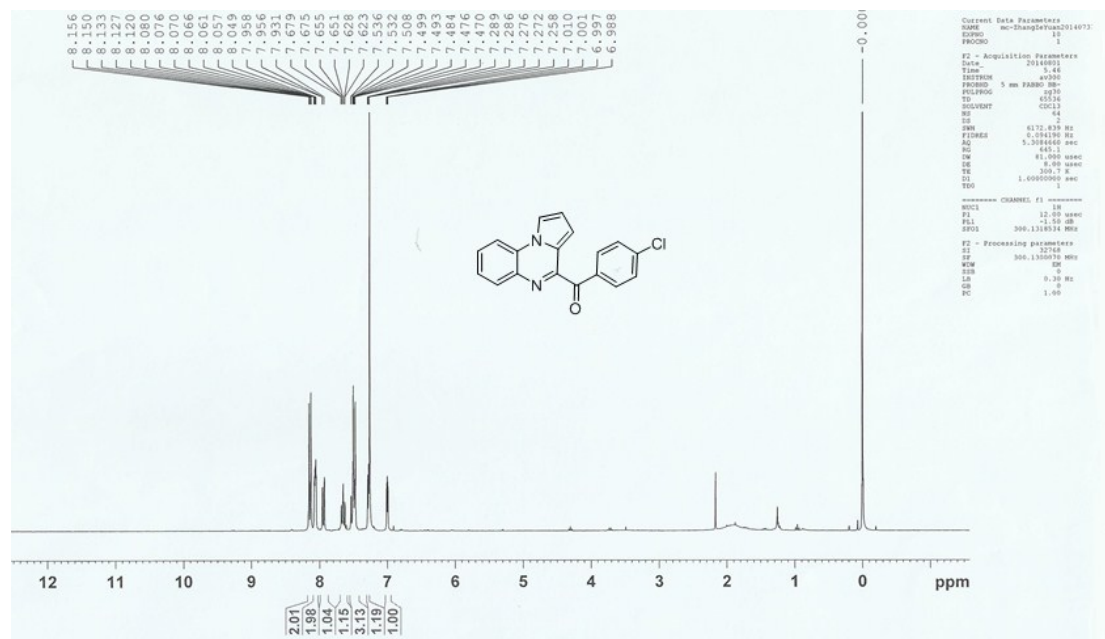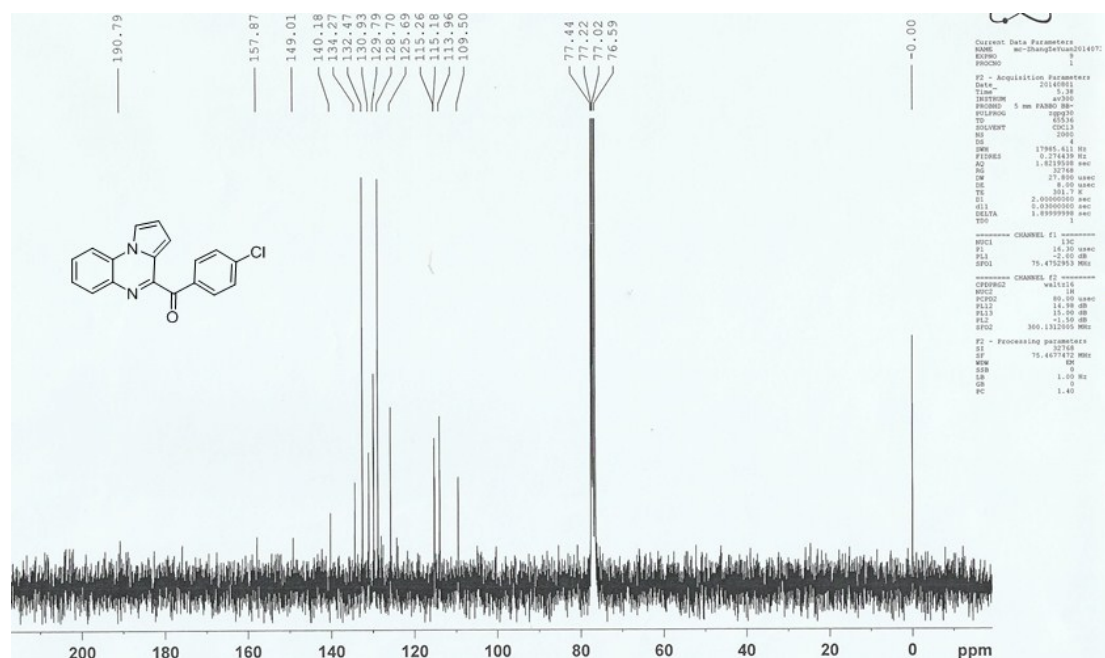



Benzo[d][1,3]dioxol-5-yl(pyrrolo[1,2-a]quinoxalin-4-yl)methanone (**3ai**).

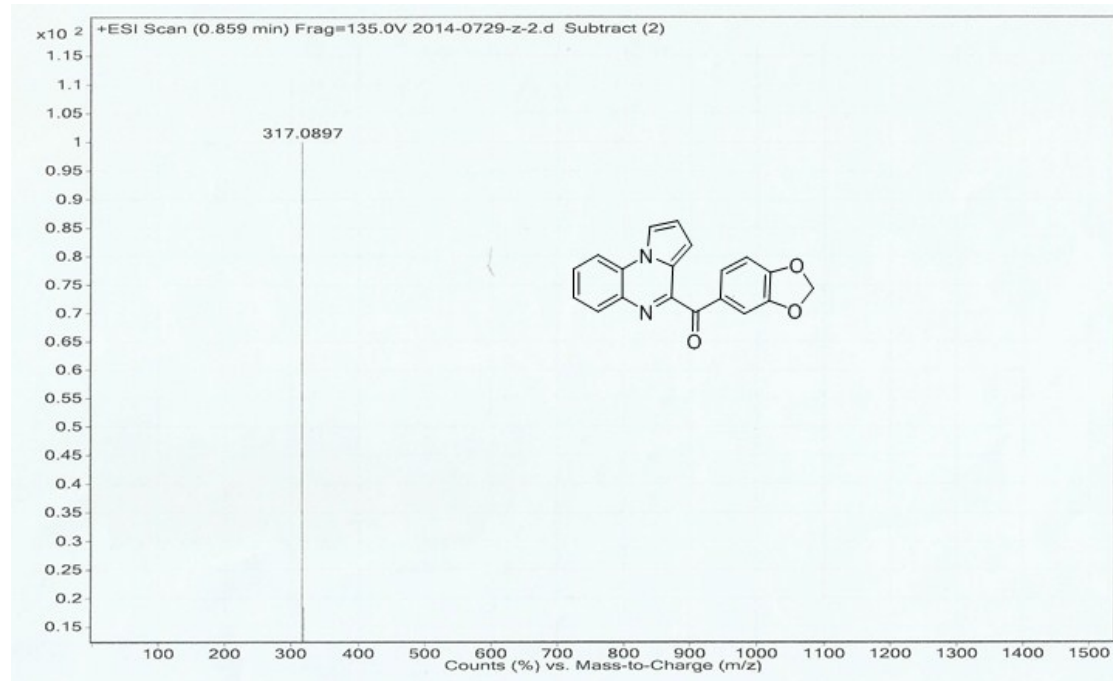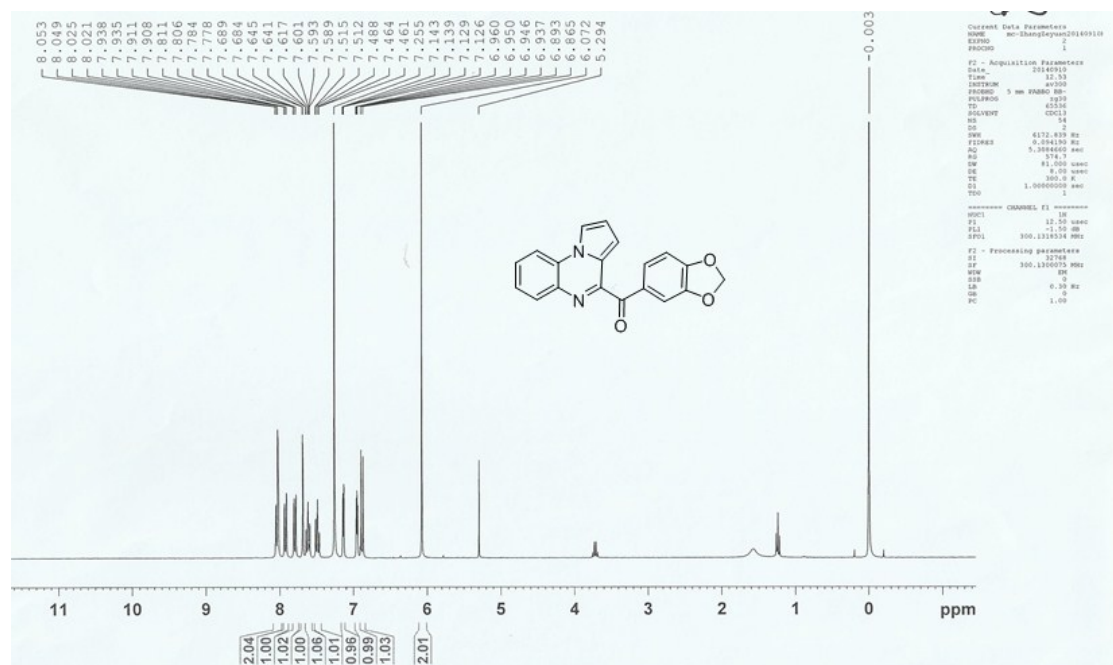

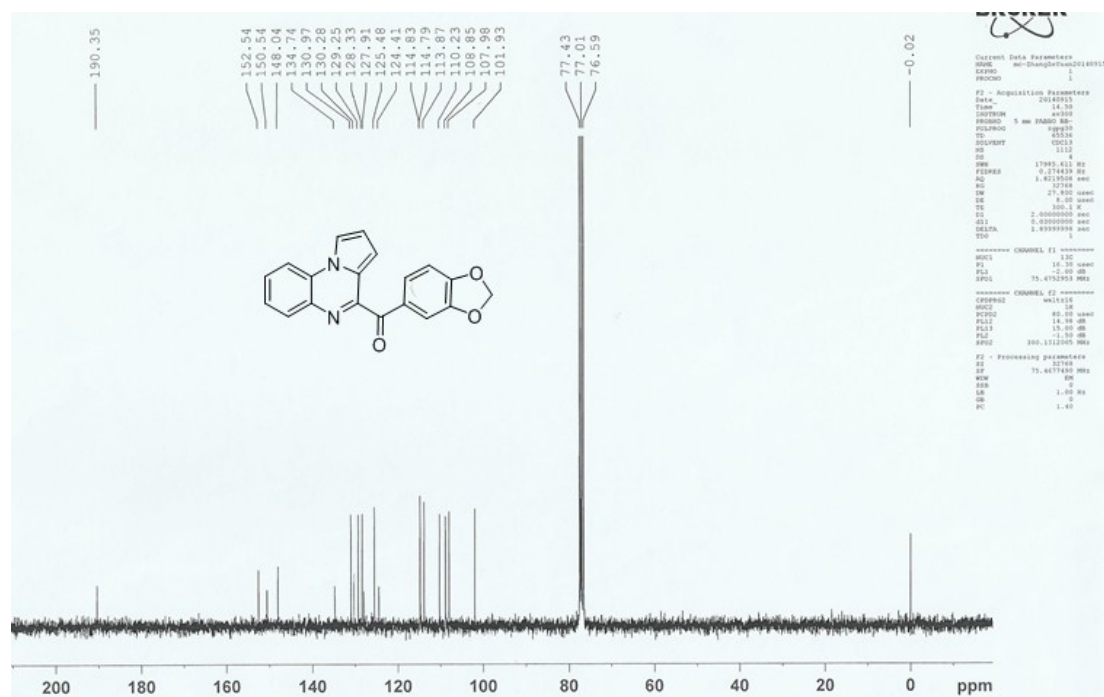

Naphthalen-1-yl(pyrrrolo[2,1-b]quinoxalin-4-yl)methanone (**3aj**).

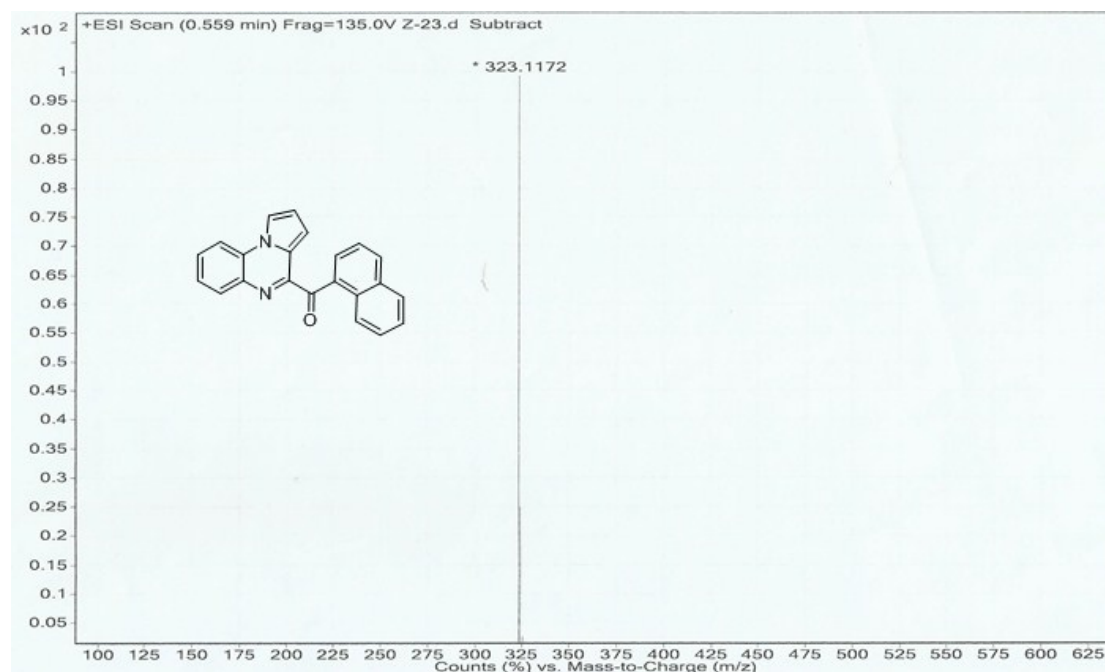

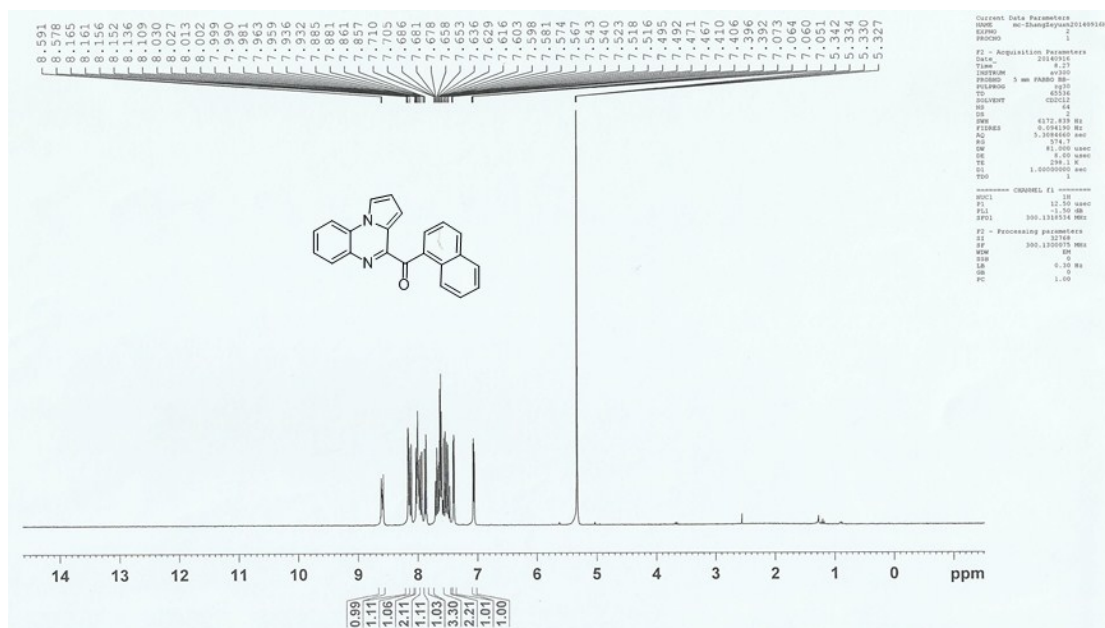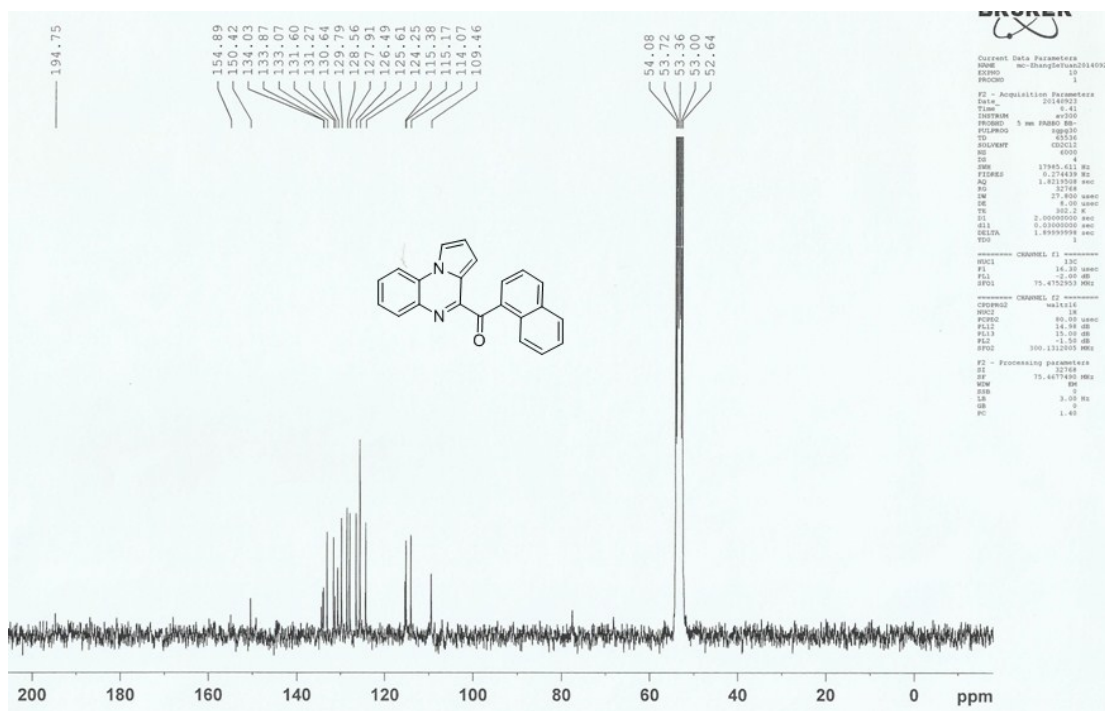

Naphthalen-2-yl(pyrrolo[1,2-a]quinoxalin-4-yl)methanone (**3ak**).

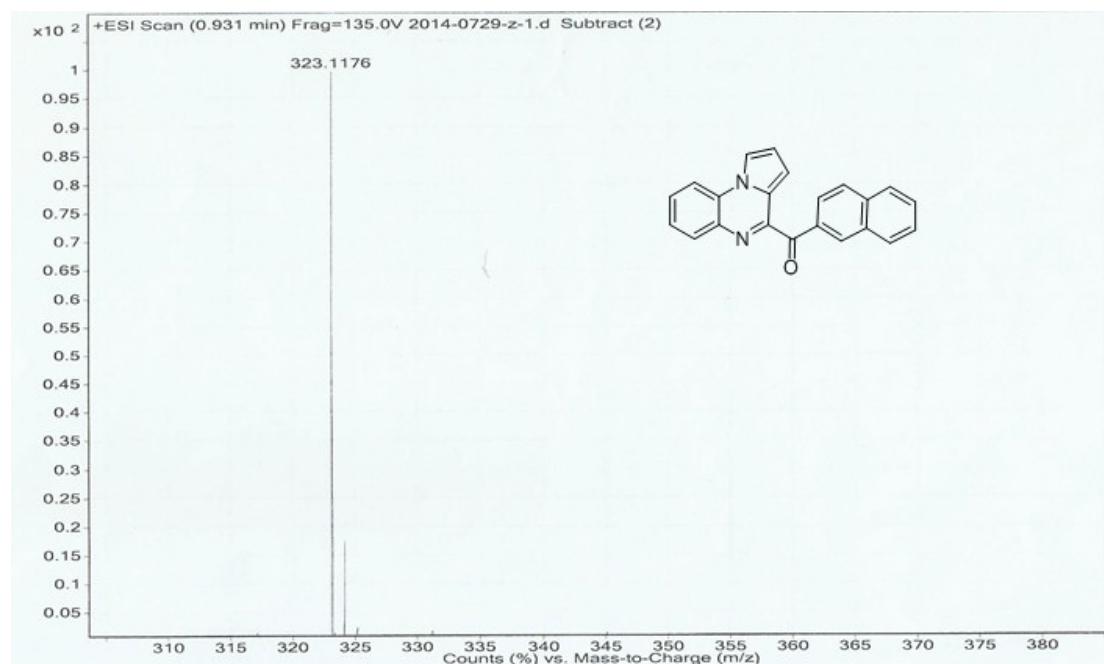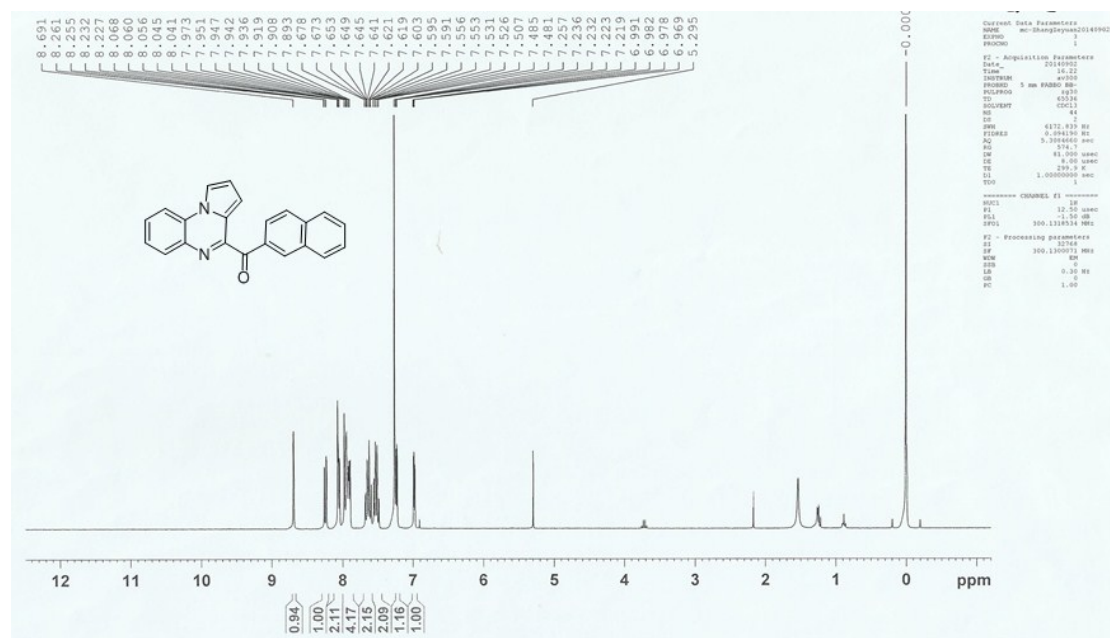

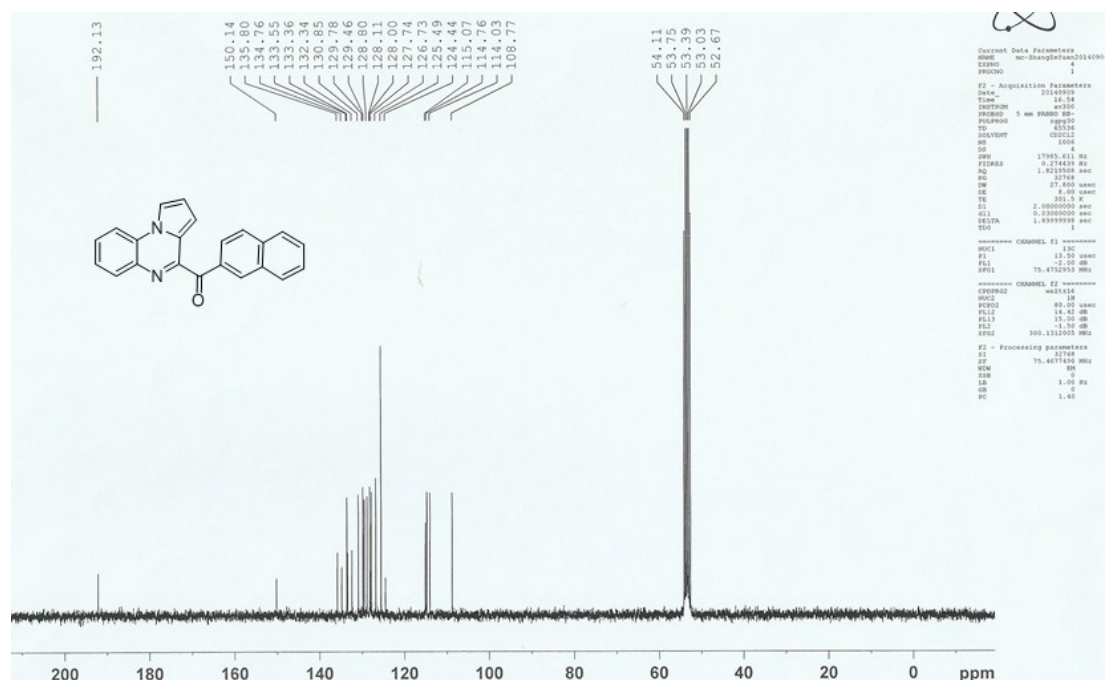

Pyrrolo[1,2-a]quinoxalin-4-yl(thiophen-2-yl)methanone (**3al**).

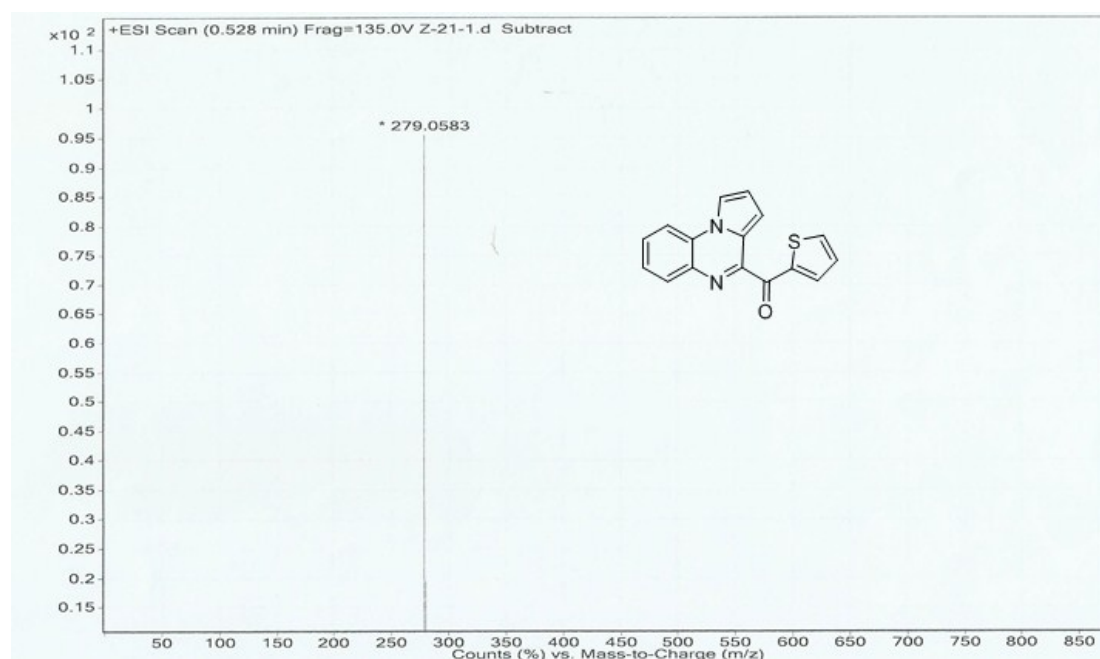





(7-Methoxypyrrolo[1,2-a]quinoxalin-4-yl)(phenyl)methanone (**3ba**)

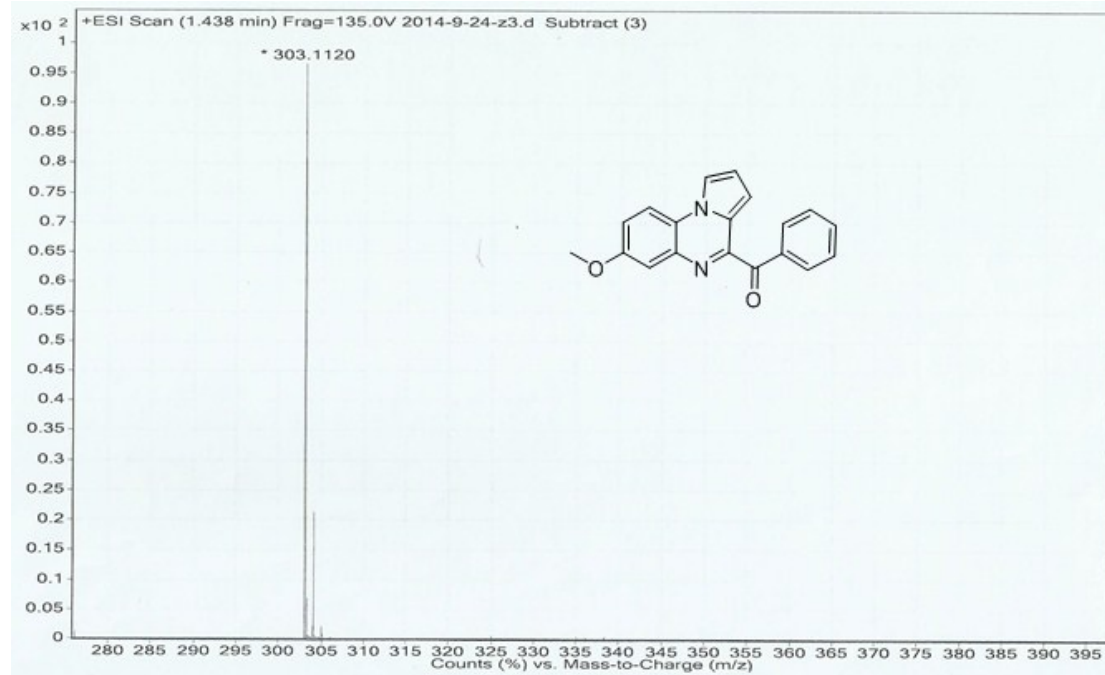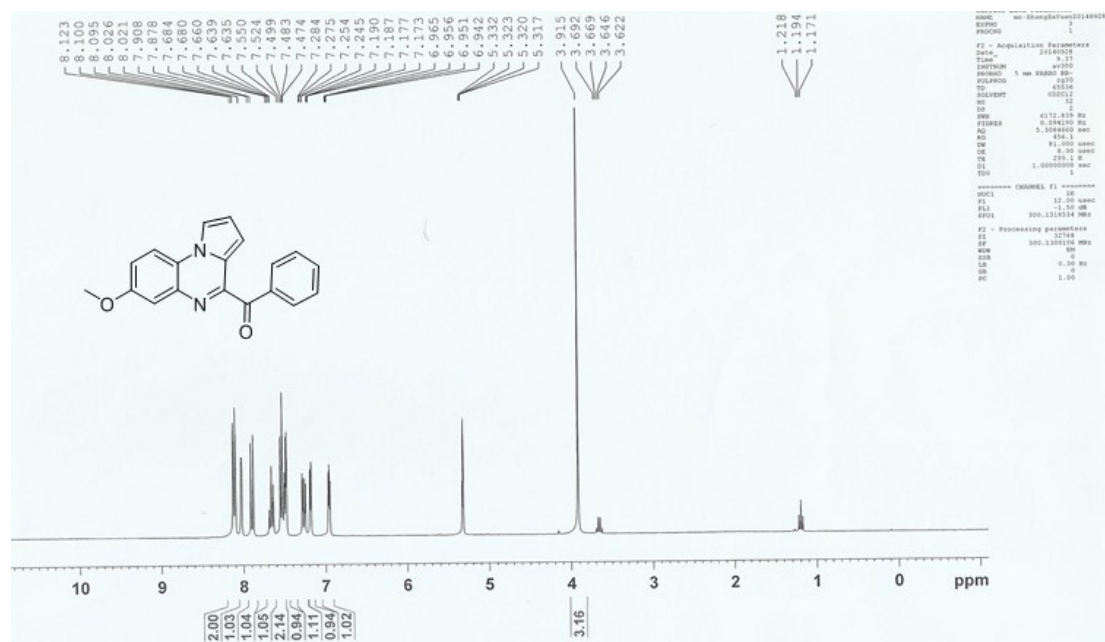

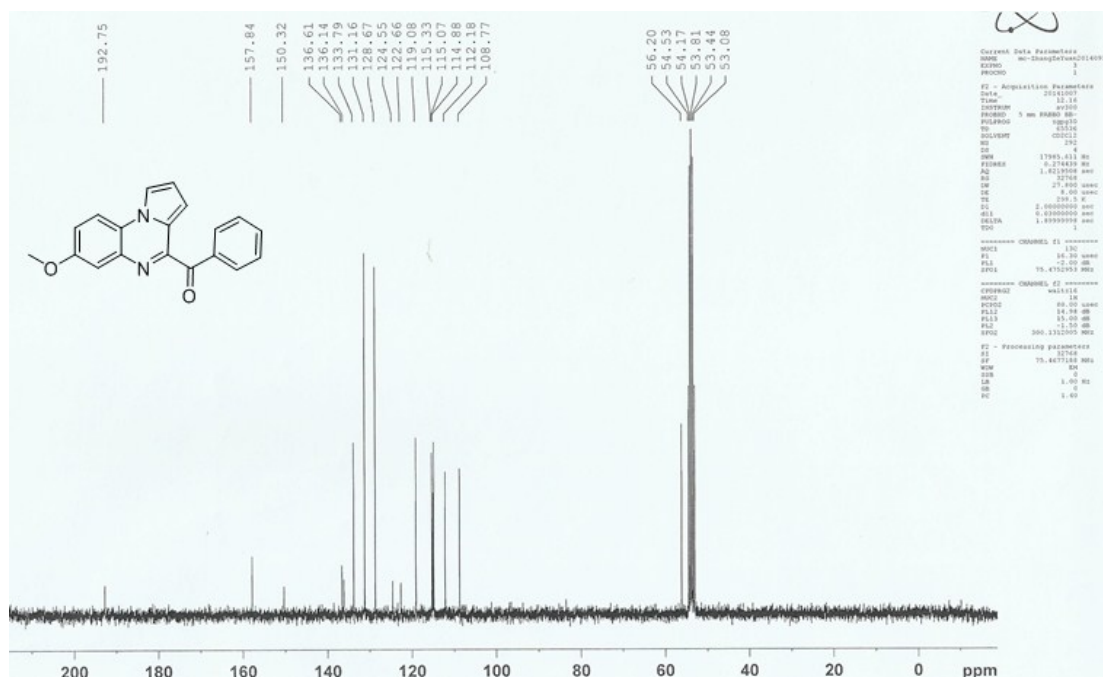

(7-Methoxypyrrolo[1,2-a]quinoxalin-4-yl)(p-tolyl)methanone (**3bc**)

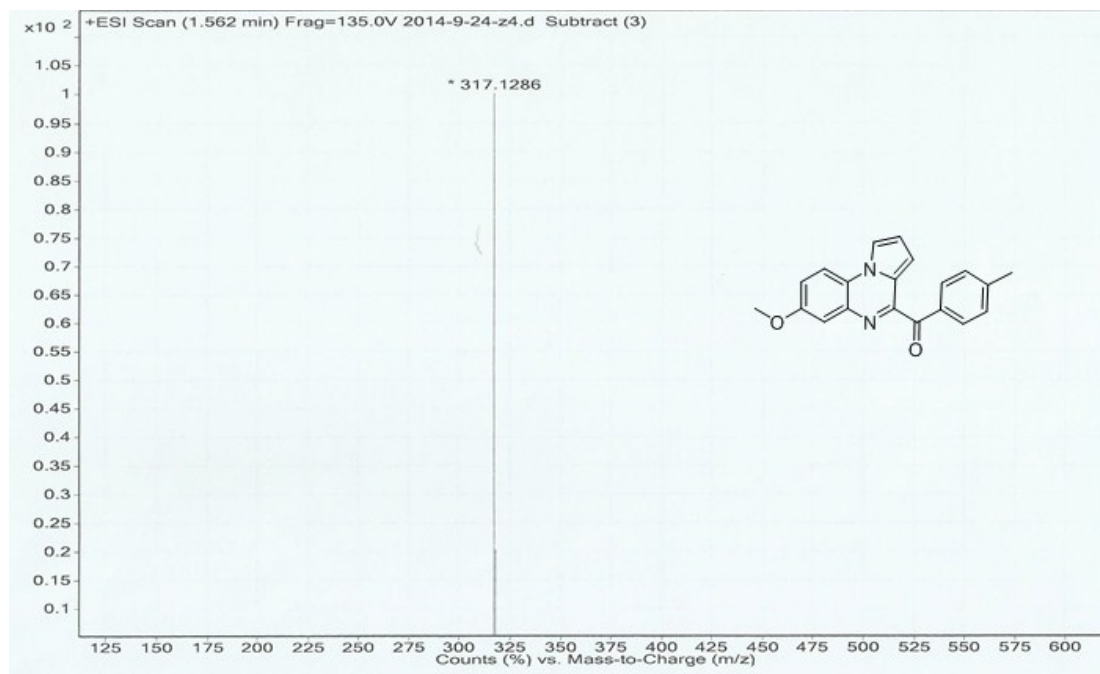



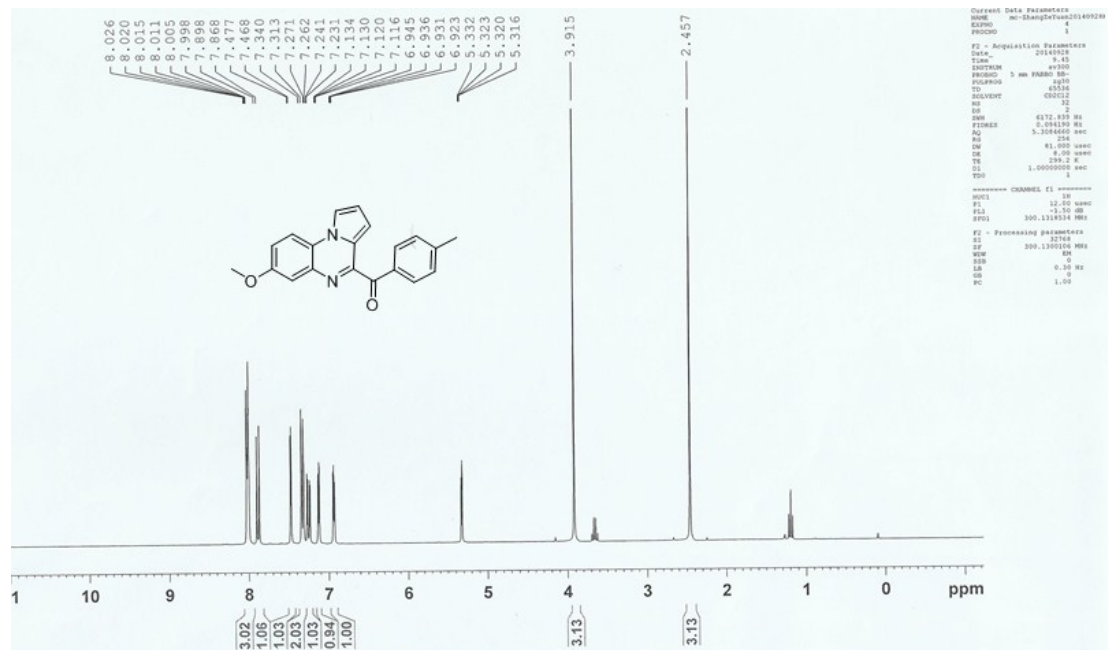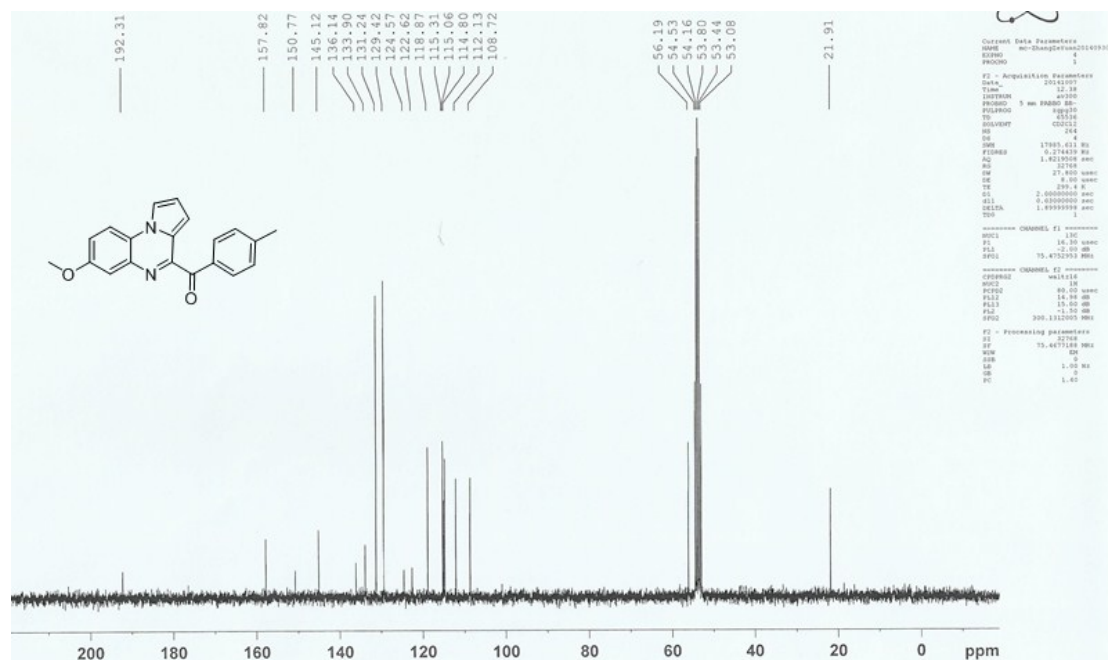

(4-Fluorophenyl)(7-methoxypyrrolo[1,2-a]quinoxalin-4-yl)methanone (**3be**)

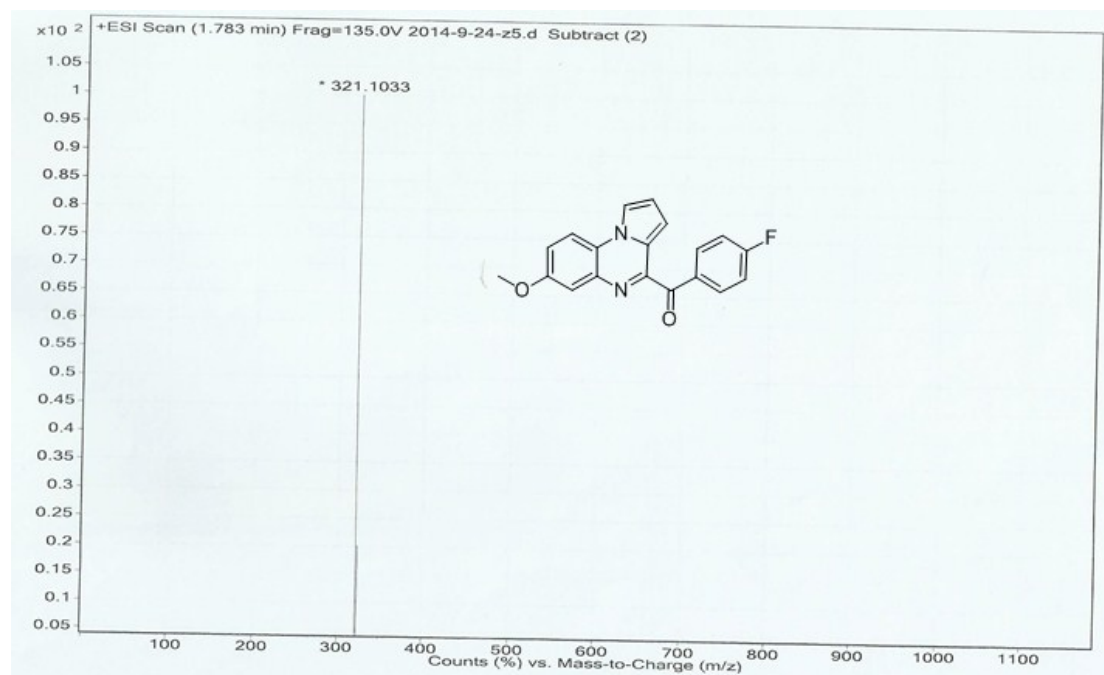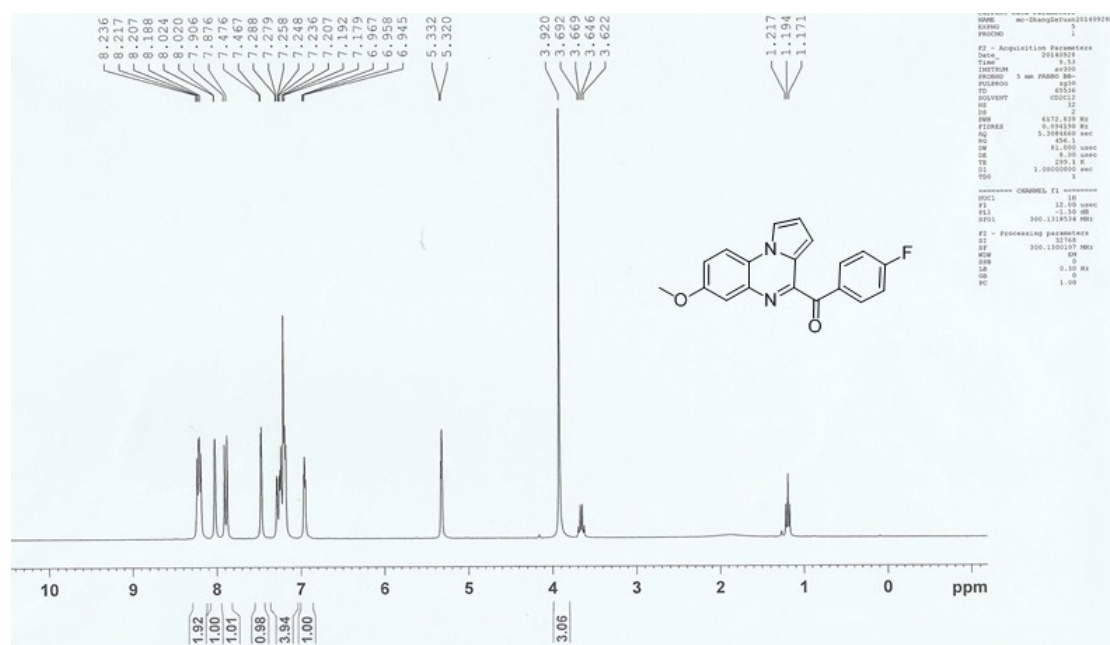

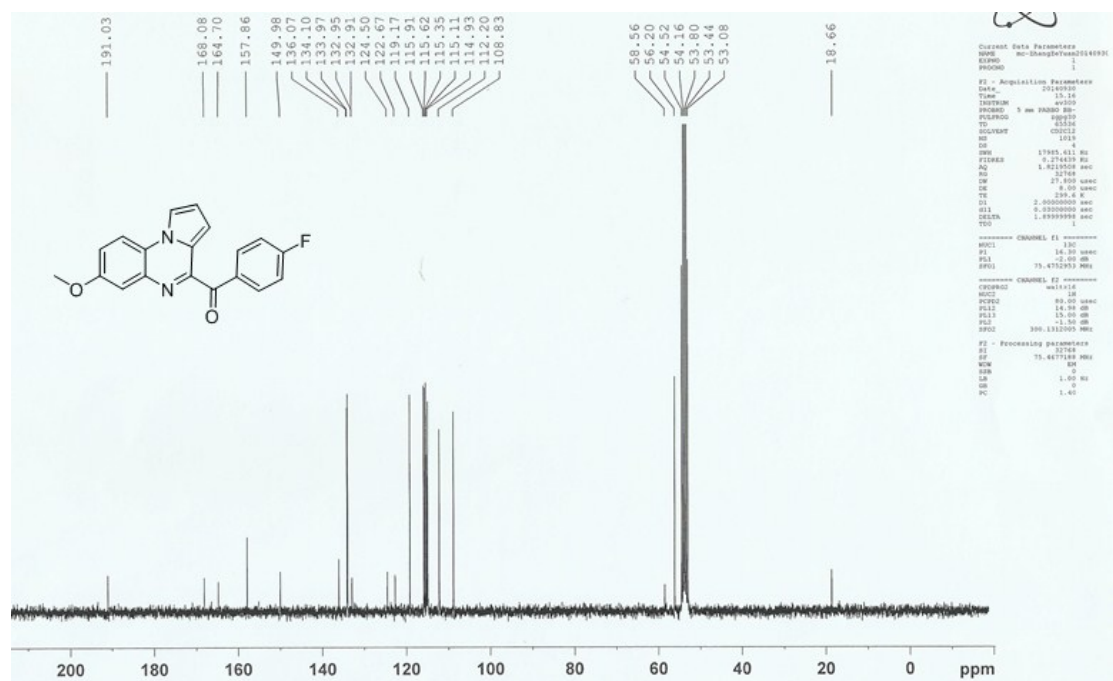

(7-Methylpyrrolo[1,2-a]quinoxalin-4-yl)(phenyl)methanone (**3ca**)

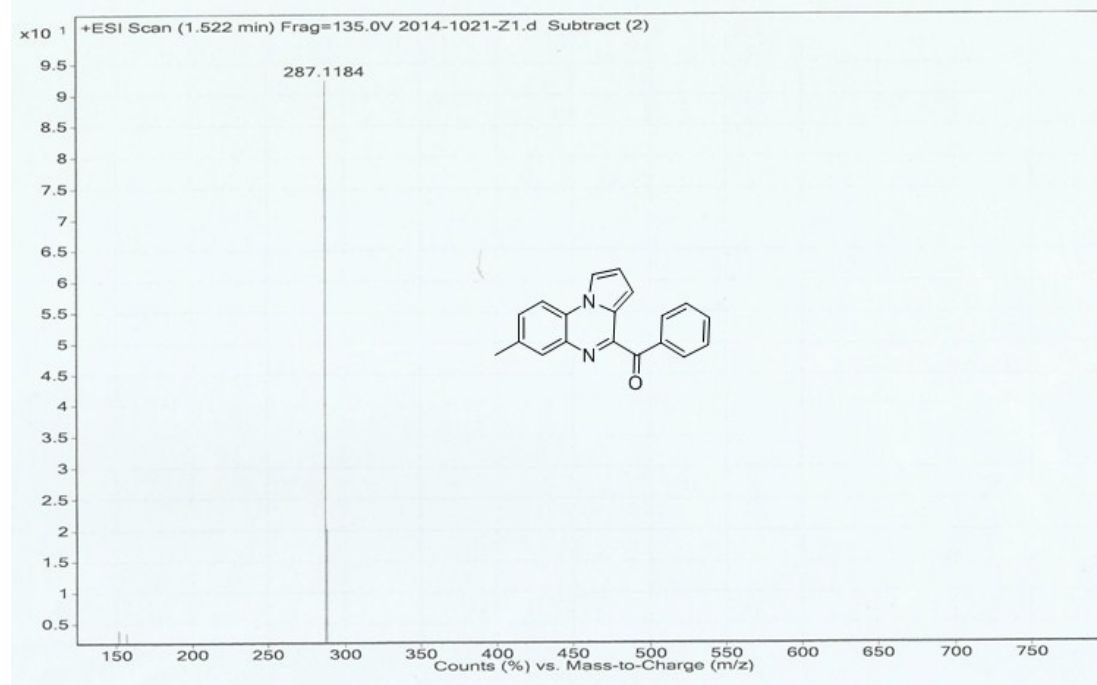

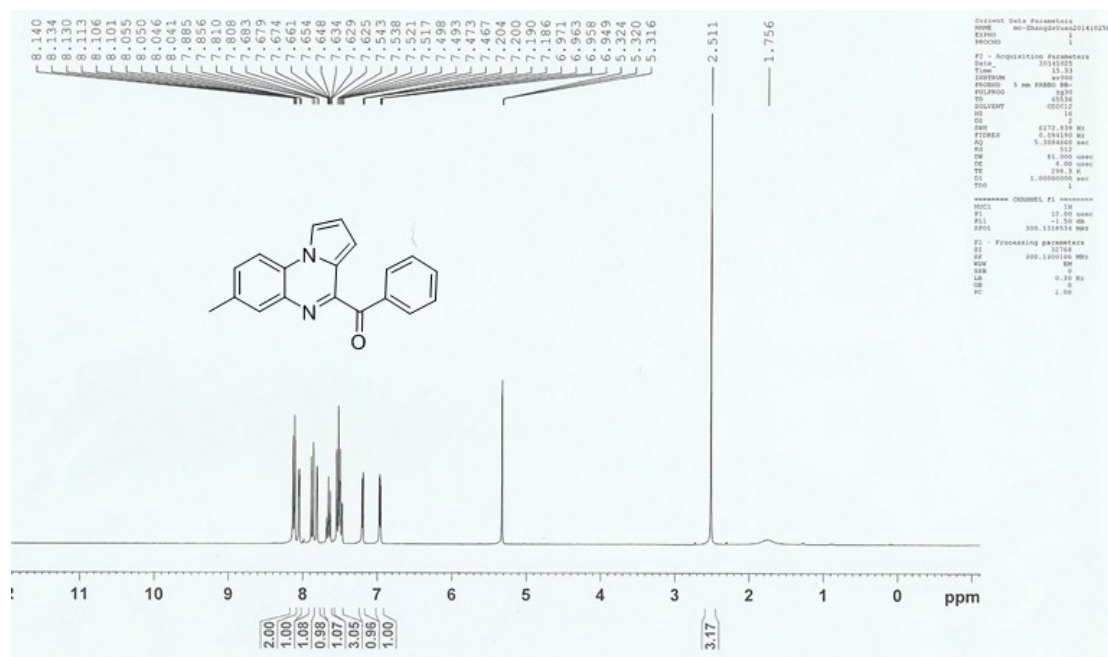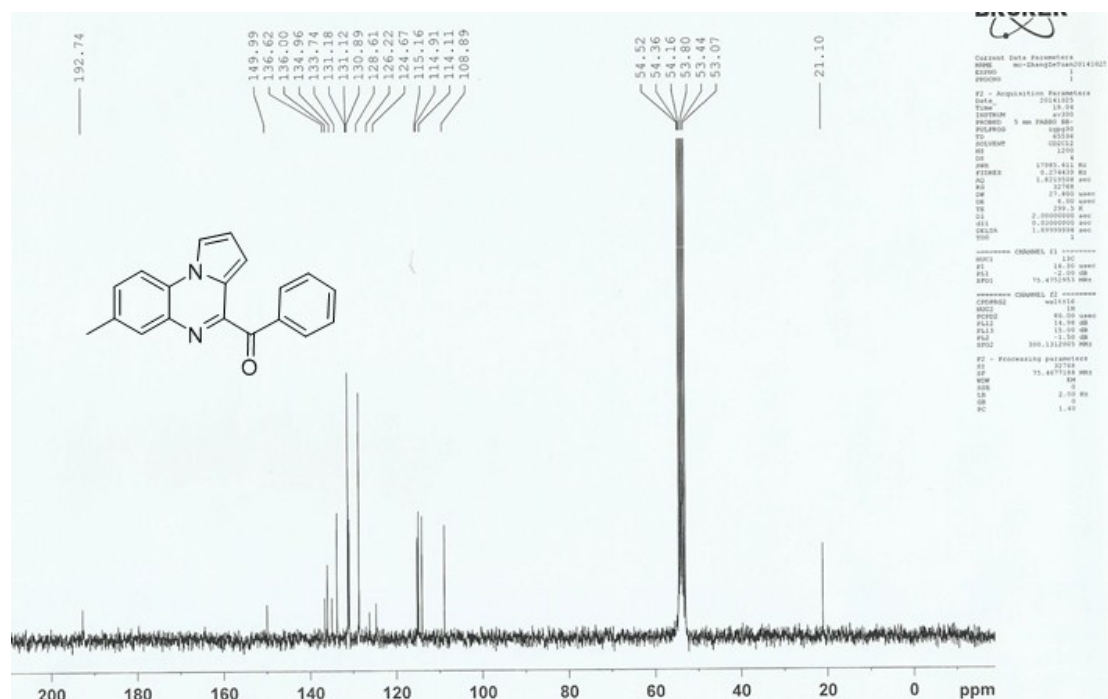

(7-Chloropyrrolo[1,2-a]quinoxalin-4-yl)(phenyl)methanone (**3da**)

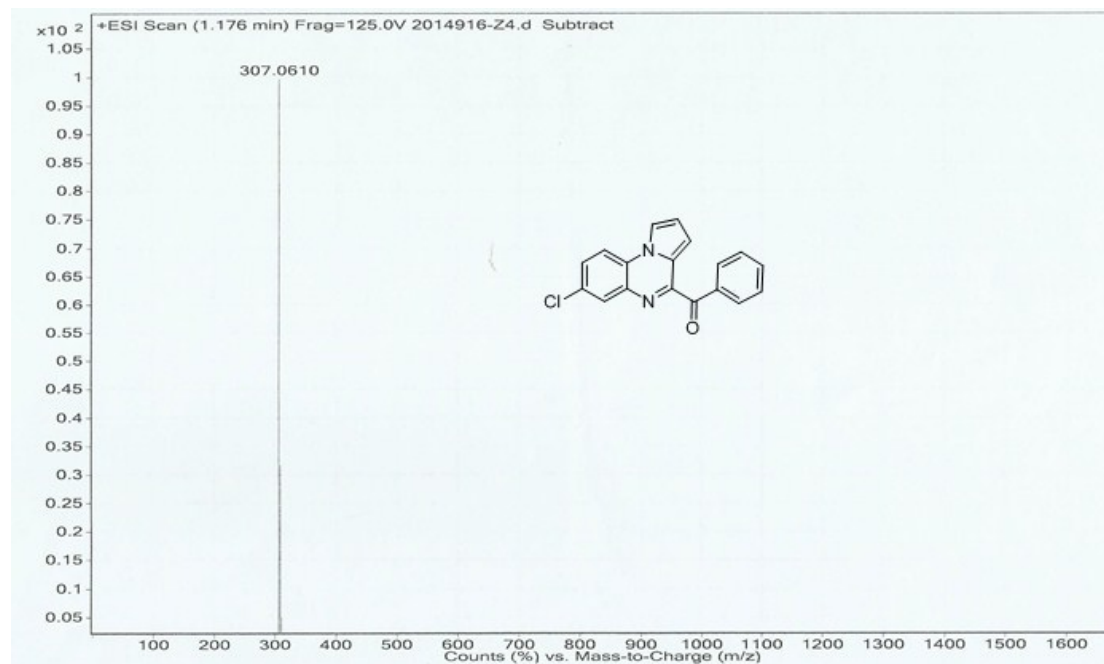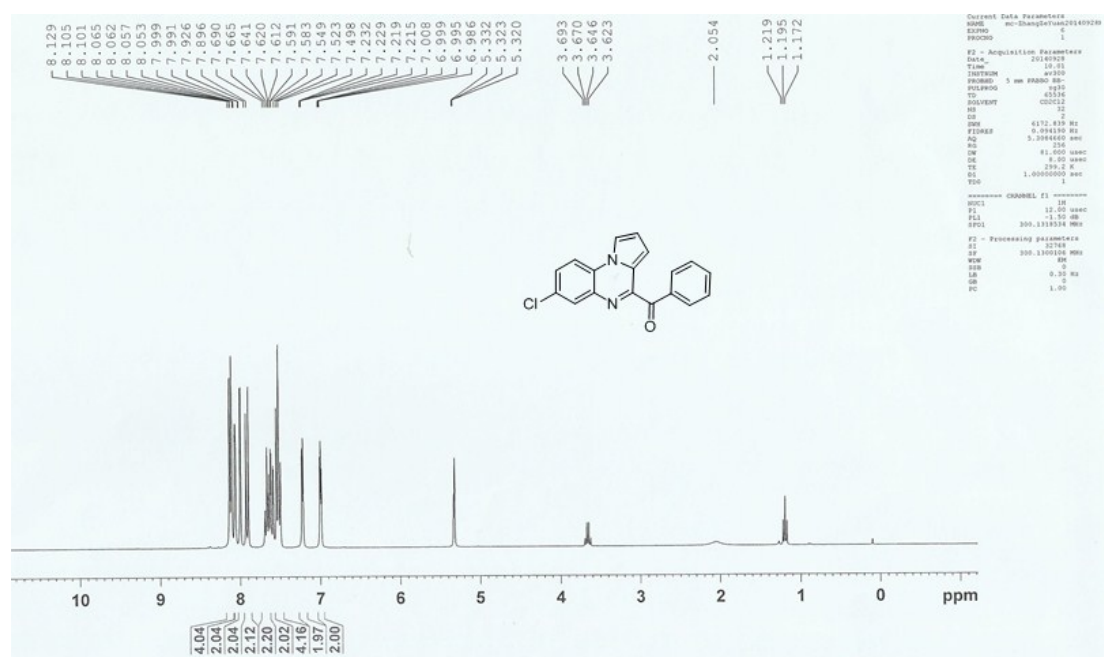







(7-Chloropyrrolo[1,2-a]quinoxalin-4-yl)(p-tolyl)methanone (**3dc**)

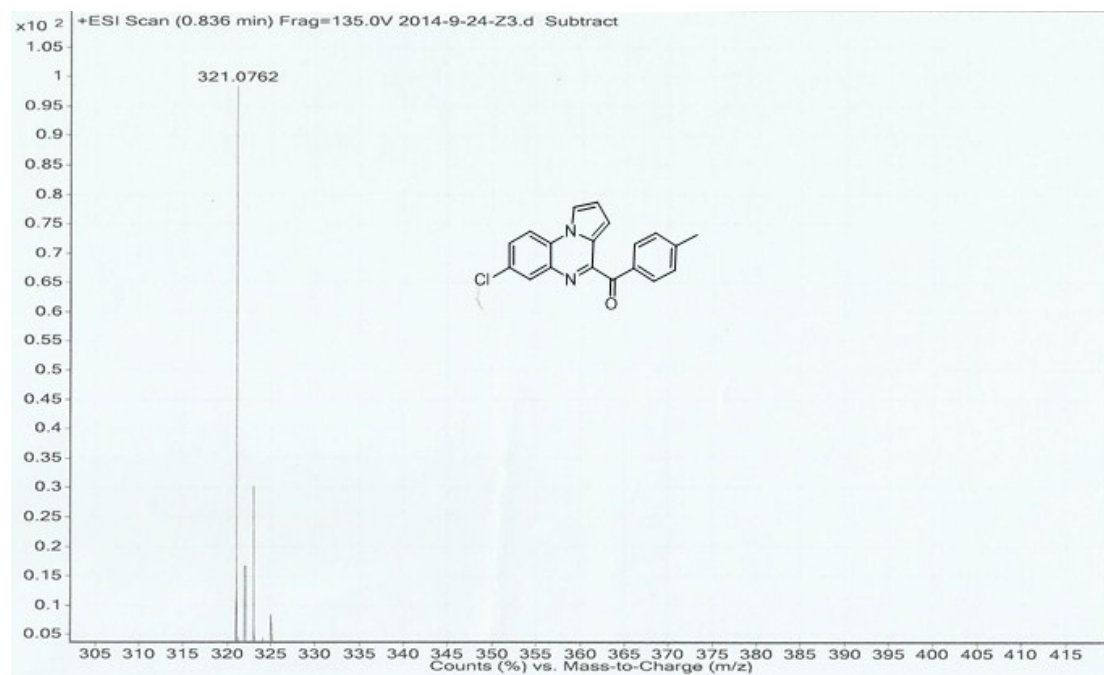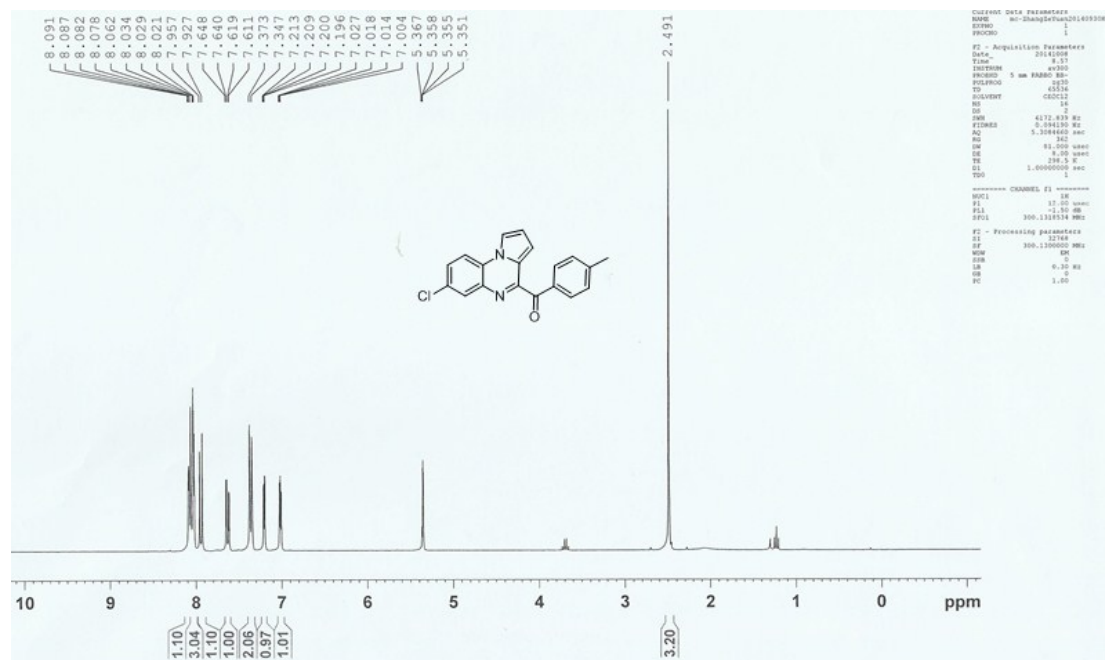



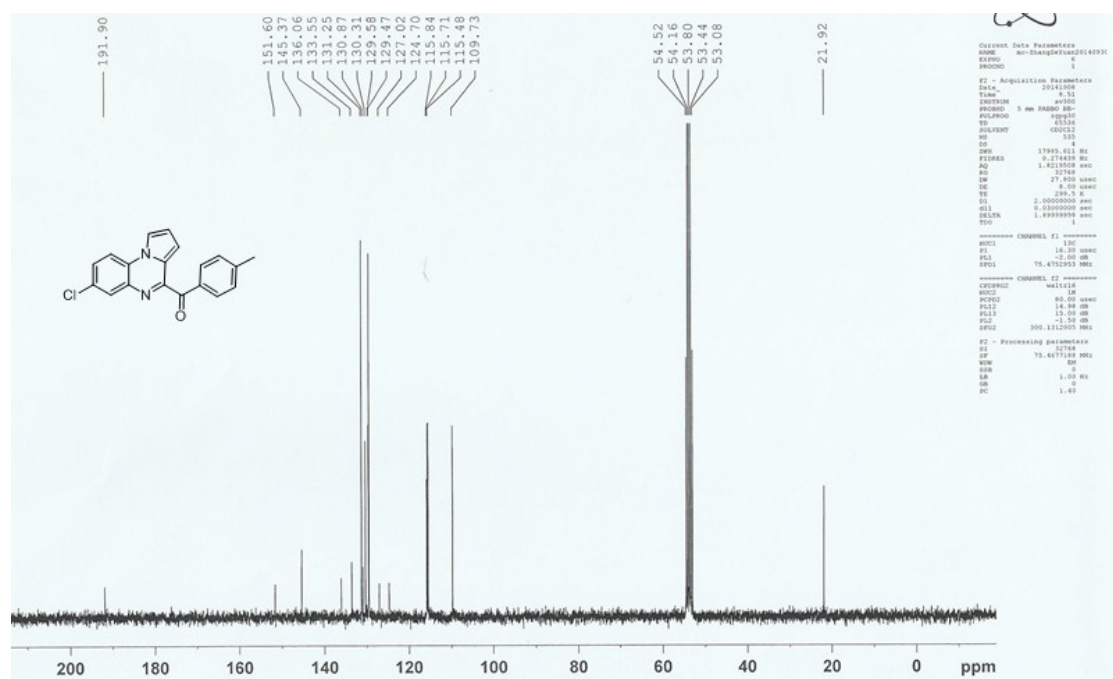

(7-Chloropyrrolo[1,2-a]quinoxalin-4-yl)(4-fluorophenyl)methanone (**3de**)

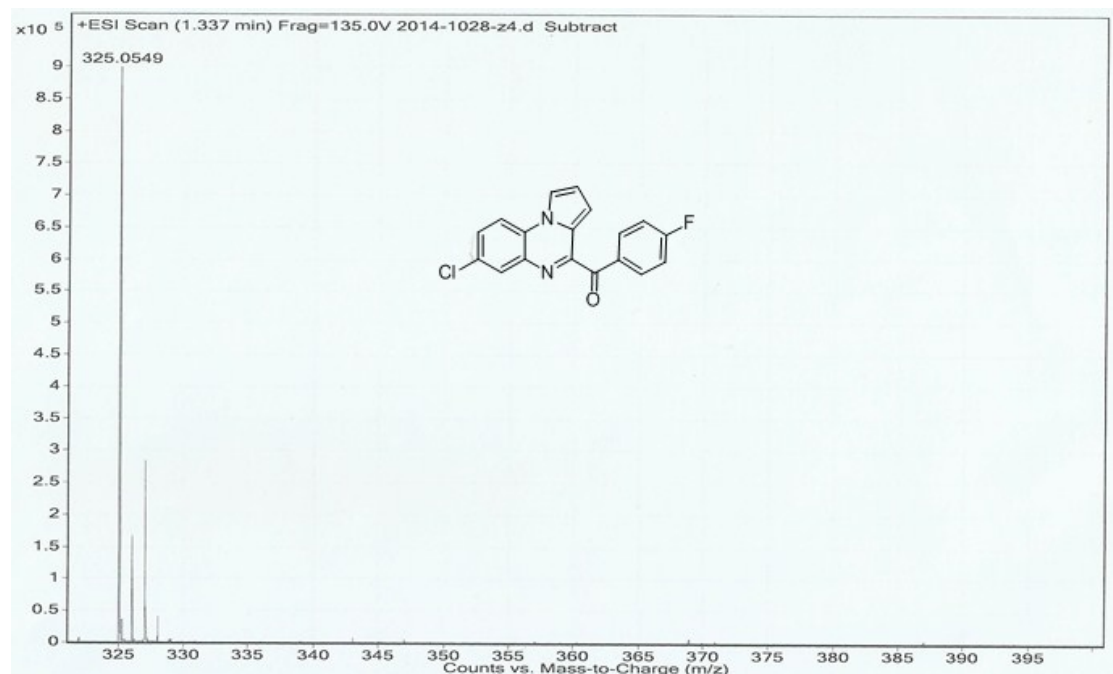

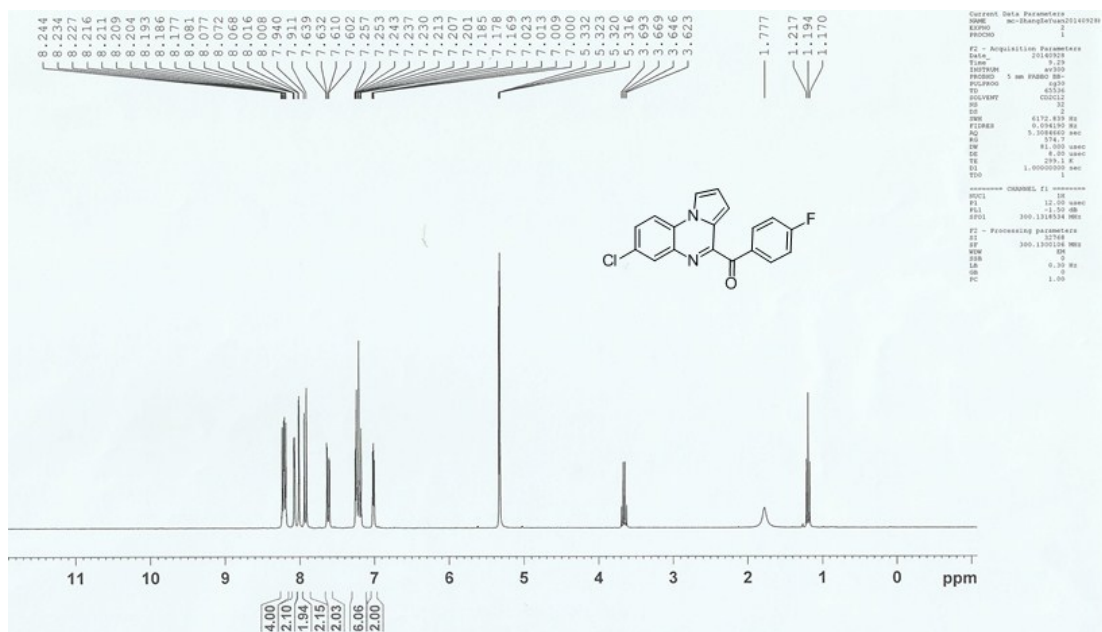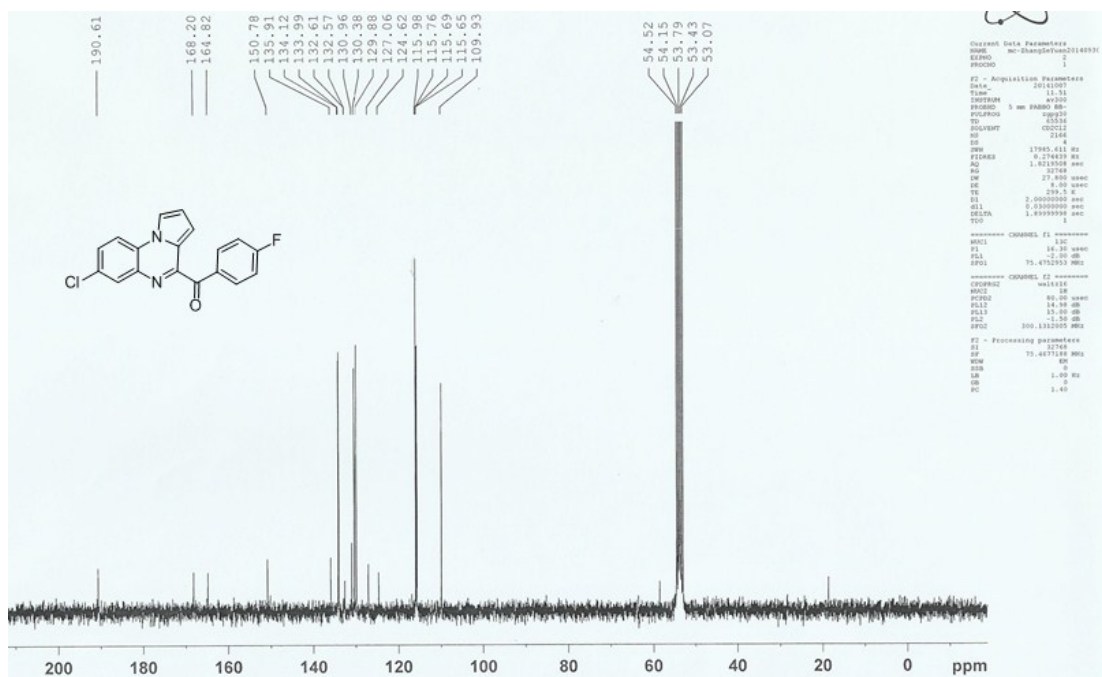

(7-Chloropyrrolo[1,2-a]quinoxalin-4-yl)(furan-2-yl)methanone (**3dm**)

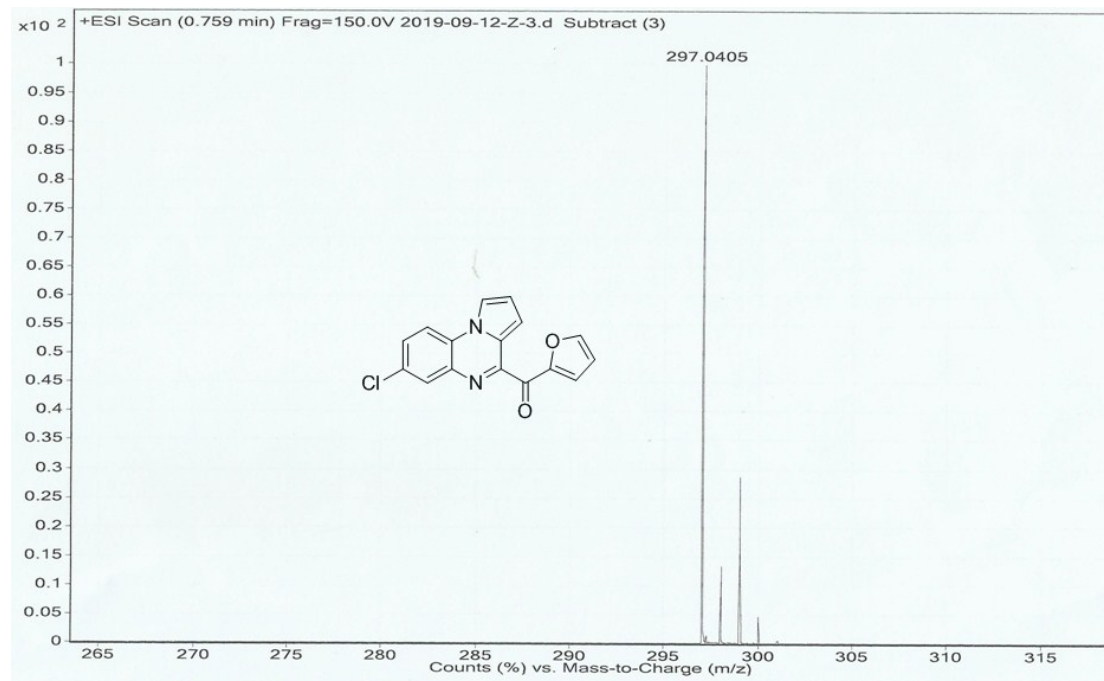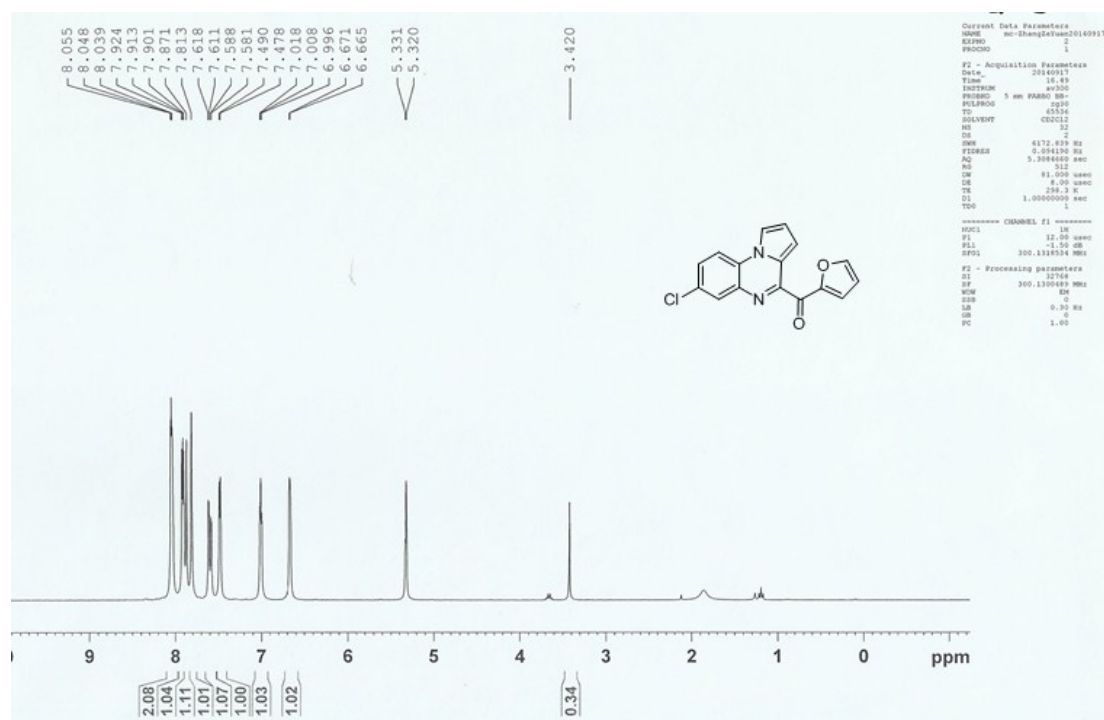

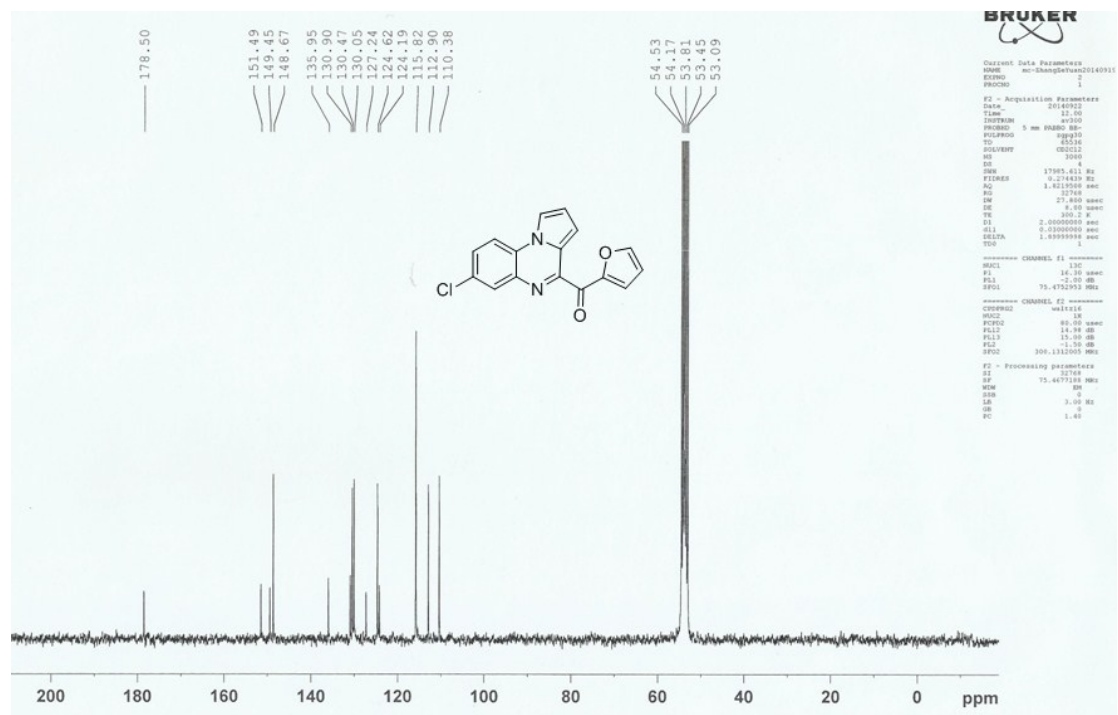

Imidazo[1,5-a]quinoxalin-4-yl(phenyl)methanone (**3ea**)

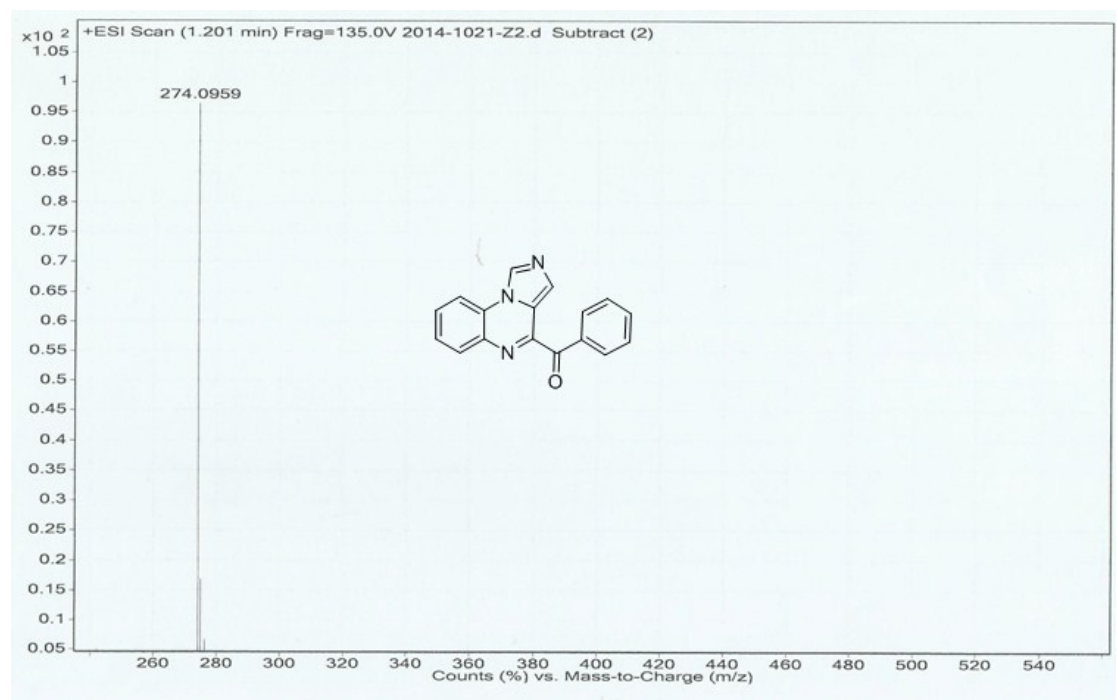

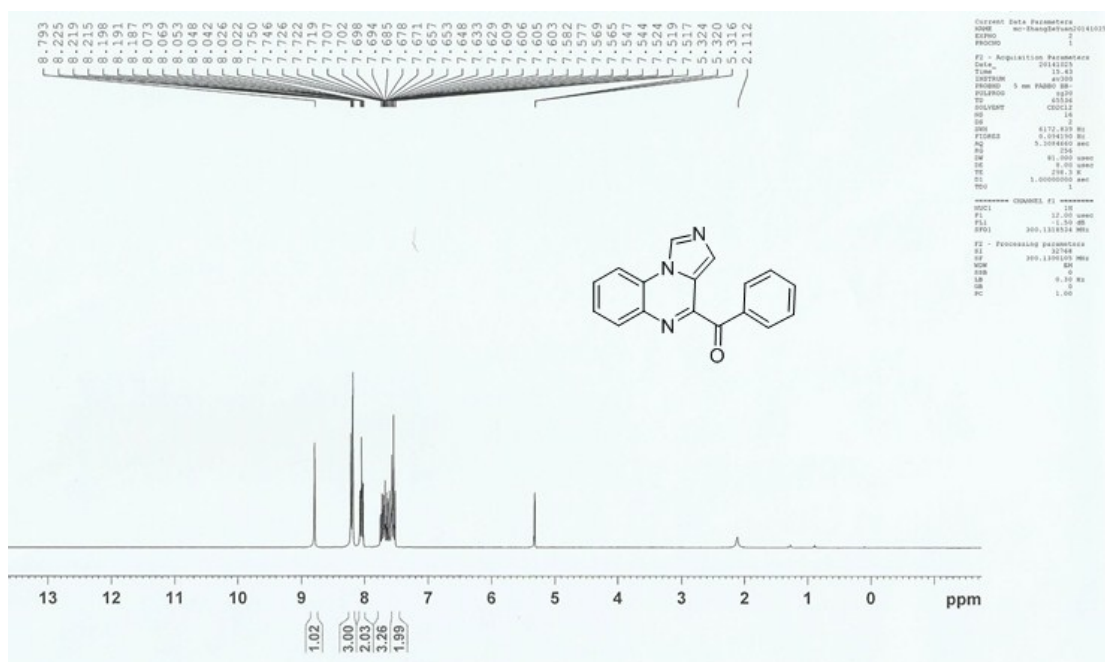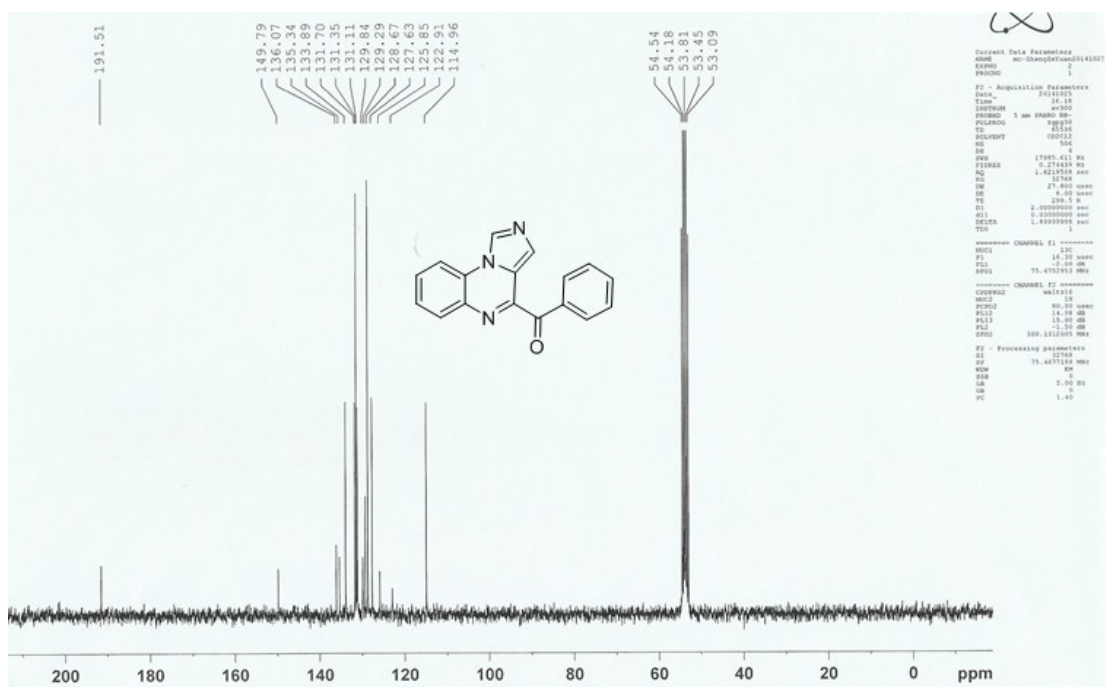



Imidazo[1,5-a]quinoxalin-4-yl(naphthalen-2-yl)methanone (**3ej**)

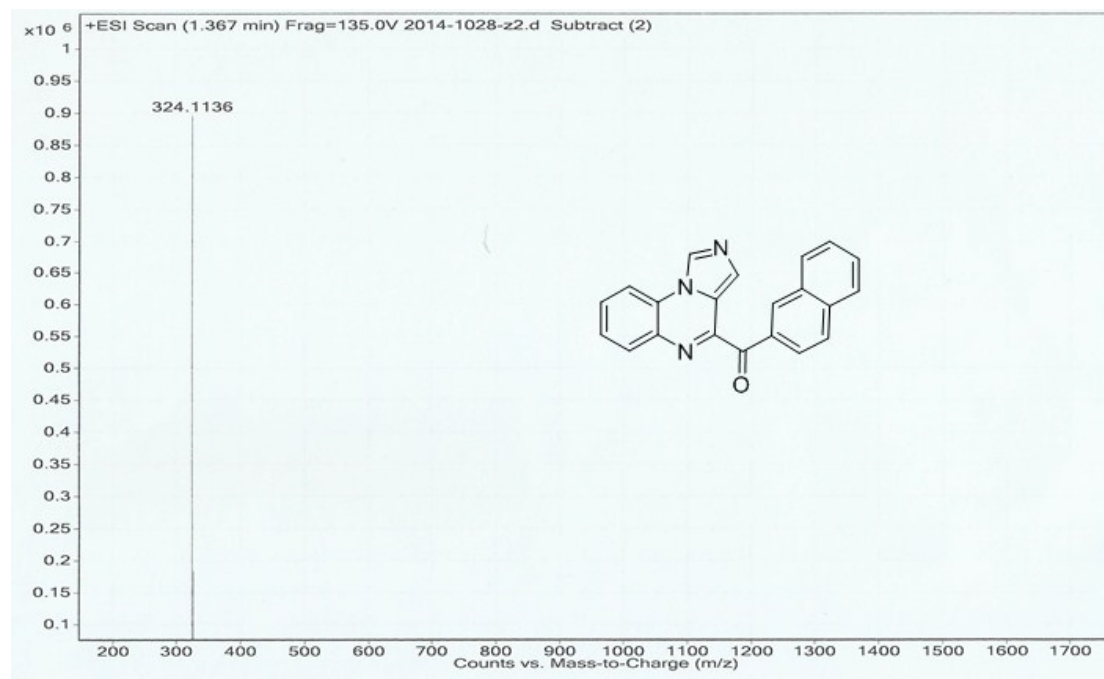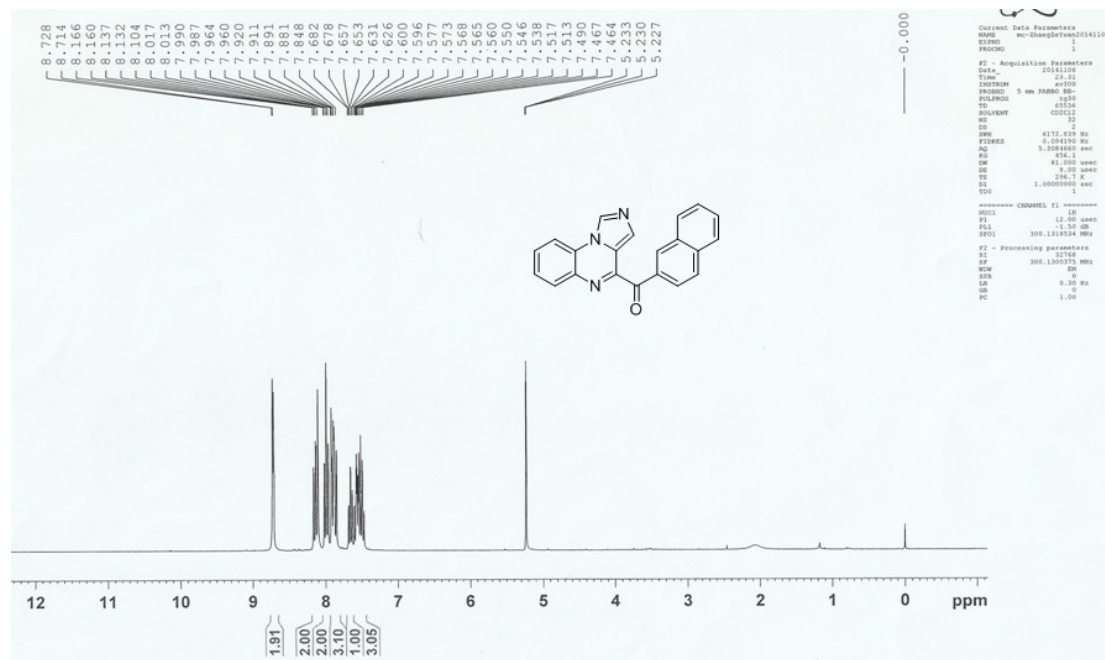

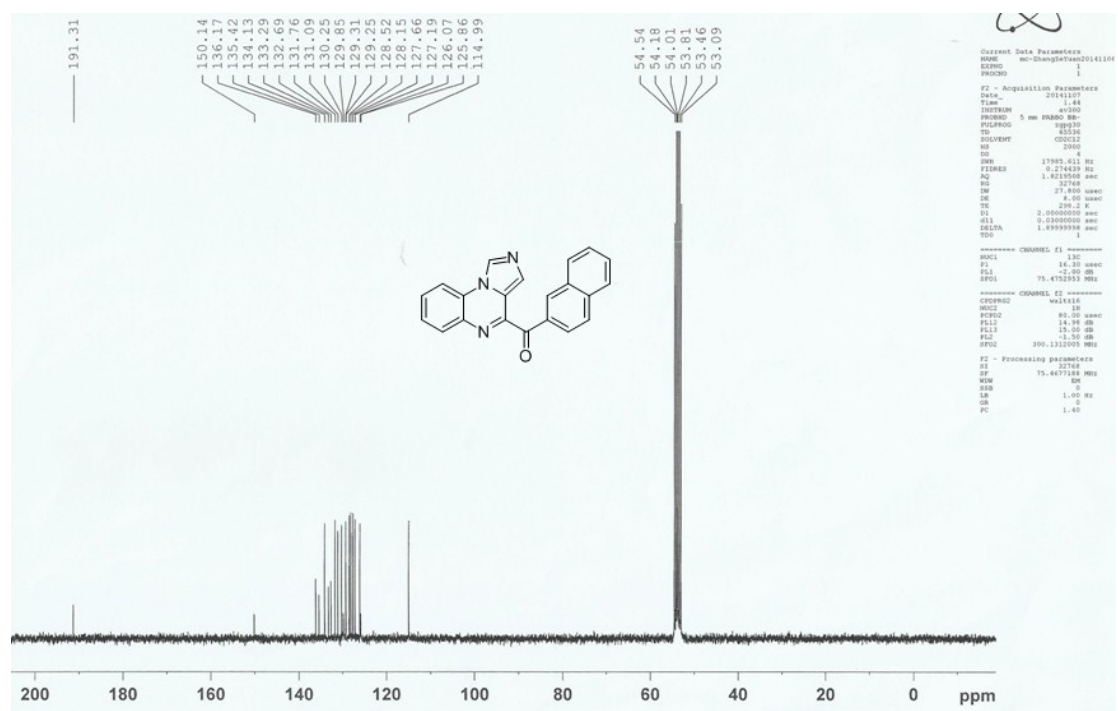

(1-Methylimidazo[1,5-a]quinoxalin-4-yl)(phenyl)methanone (**3fa**)

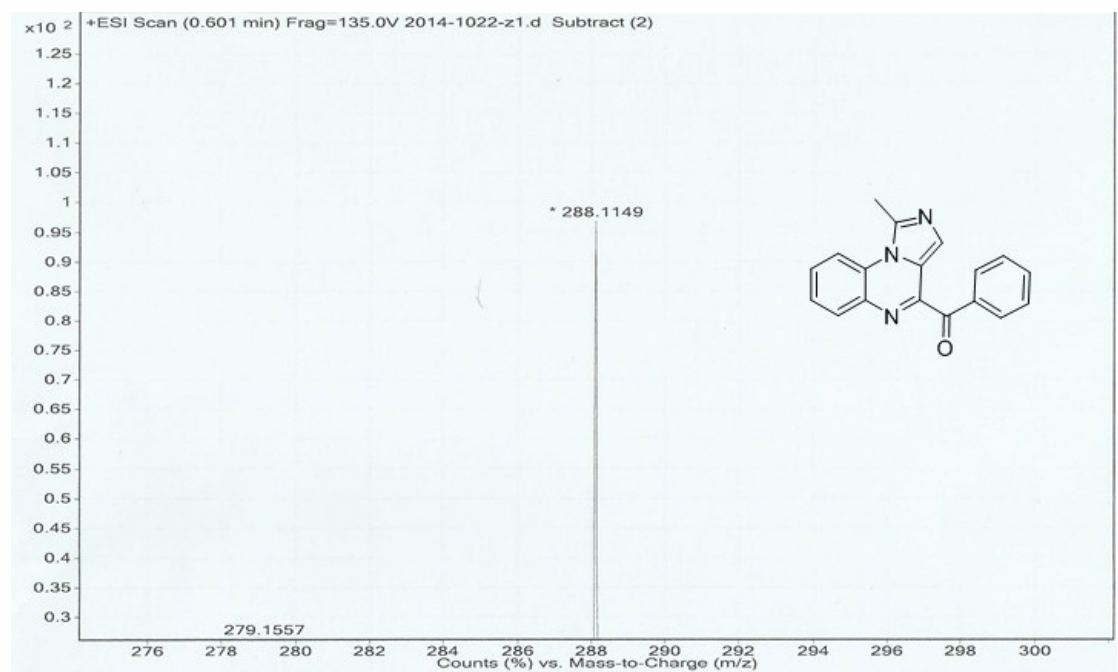

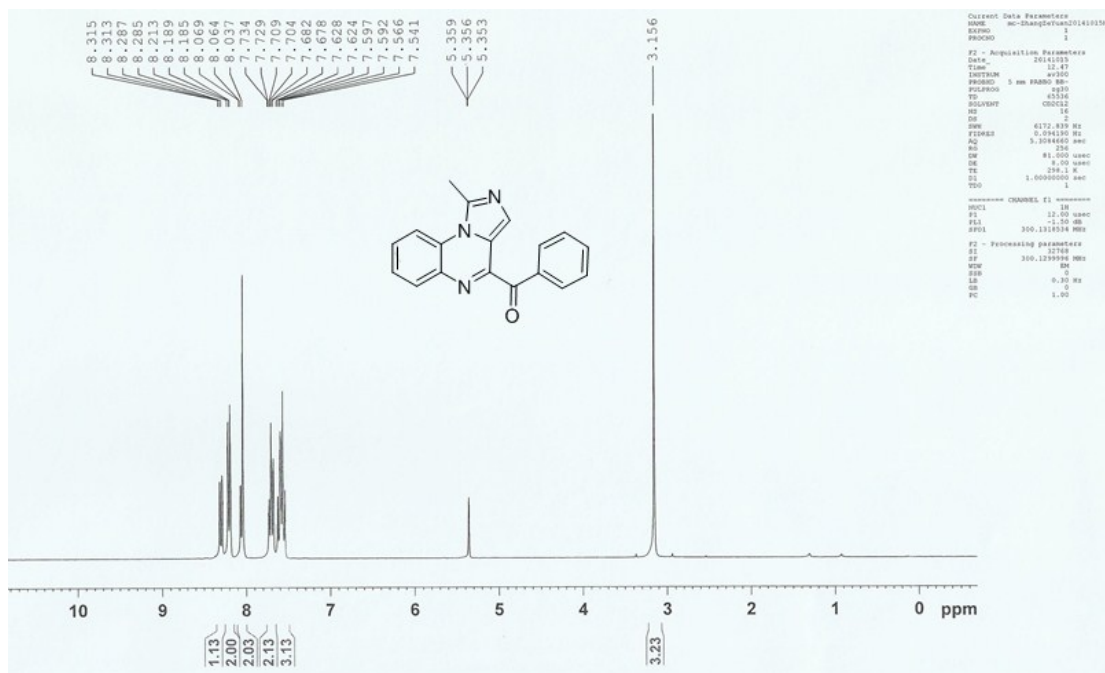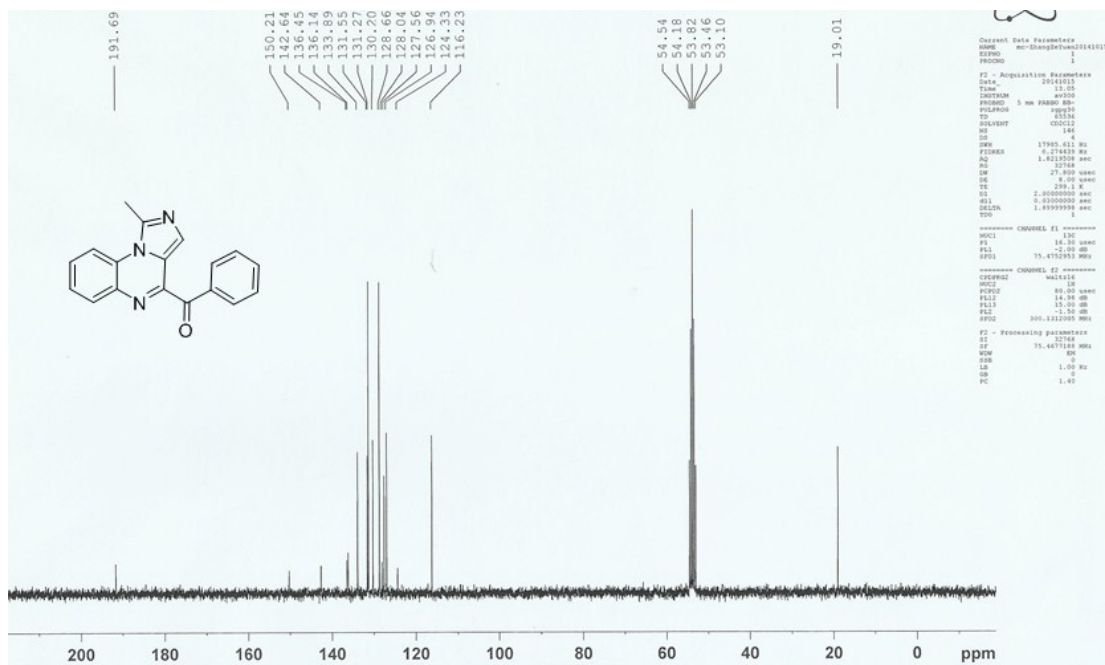



(1-Methylimidazo[1,5-a]quinoxalin-4-yl)(p-tolyl)methanone (**3fc**)

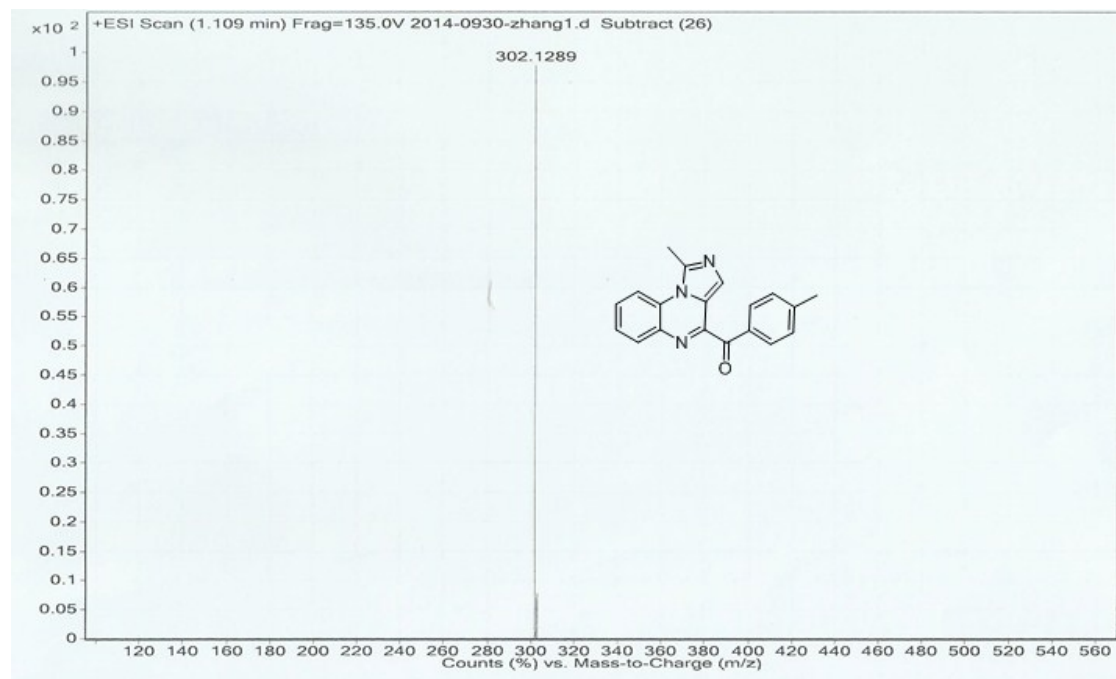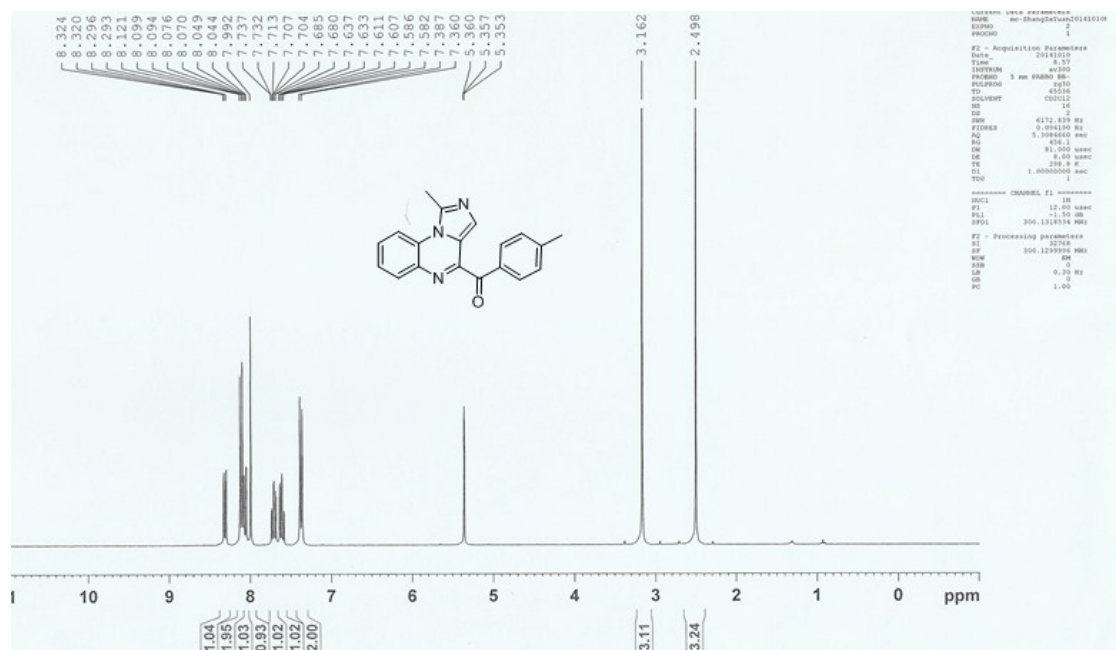

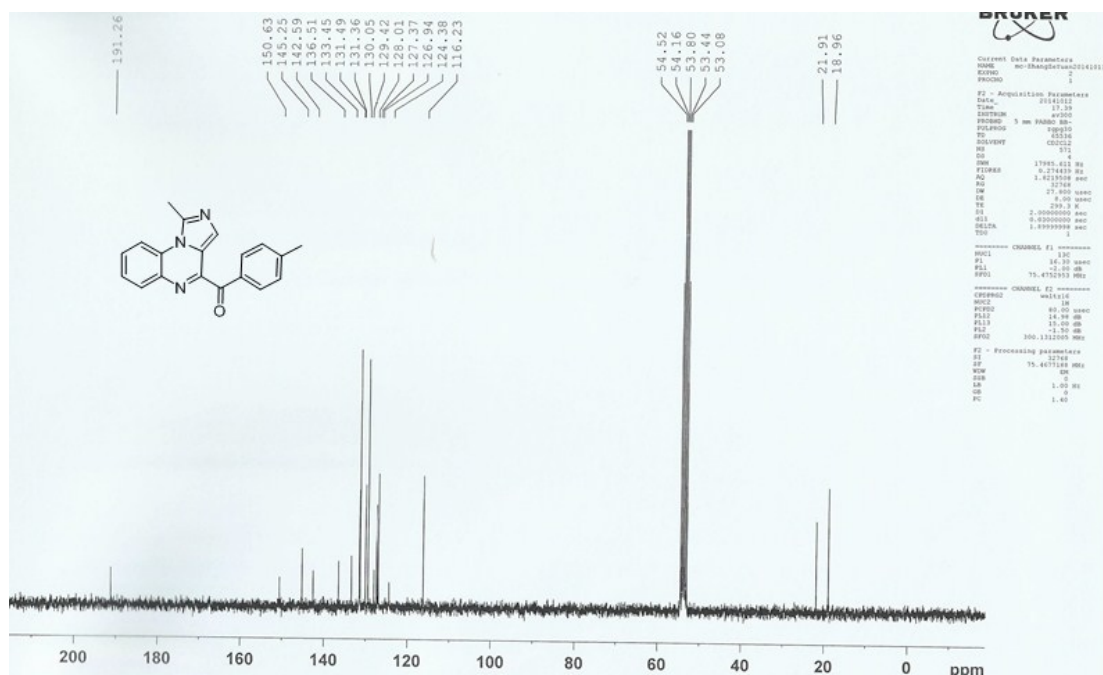

(4-Fluorophenyl)(1-methylimidazo[1,5-a]quinoxalin-4-yl)methanone (**3fe**)

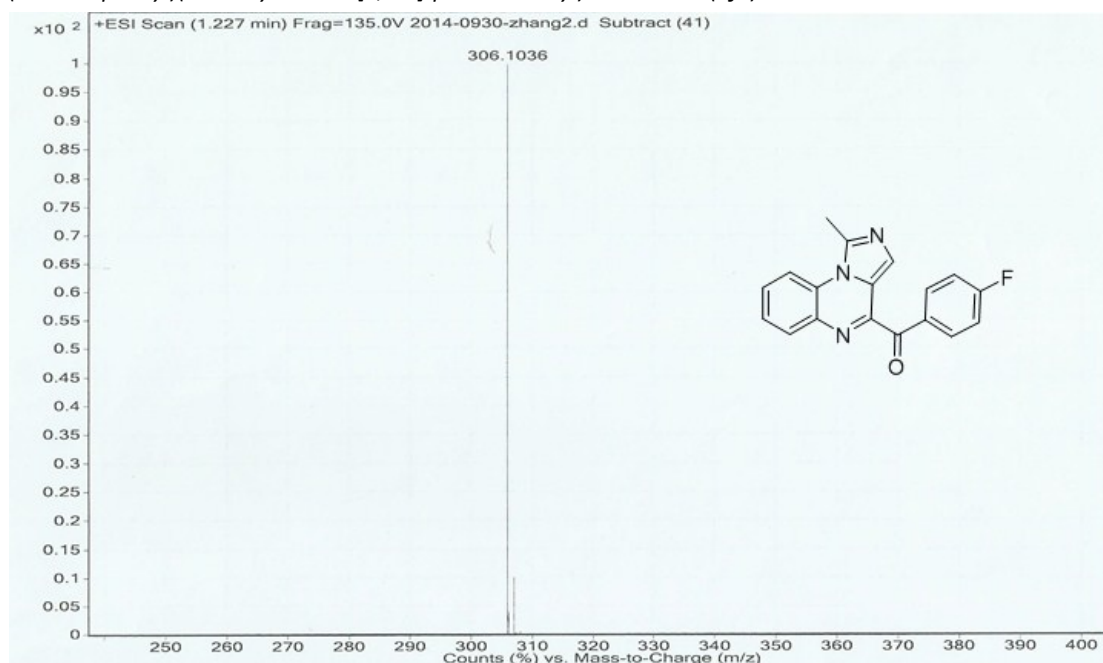

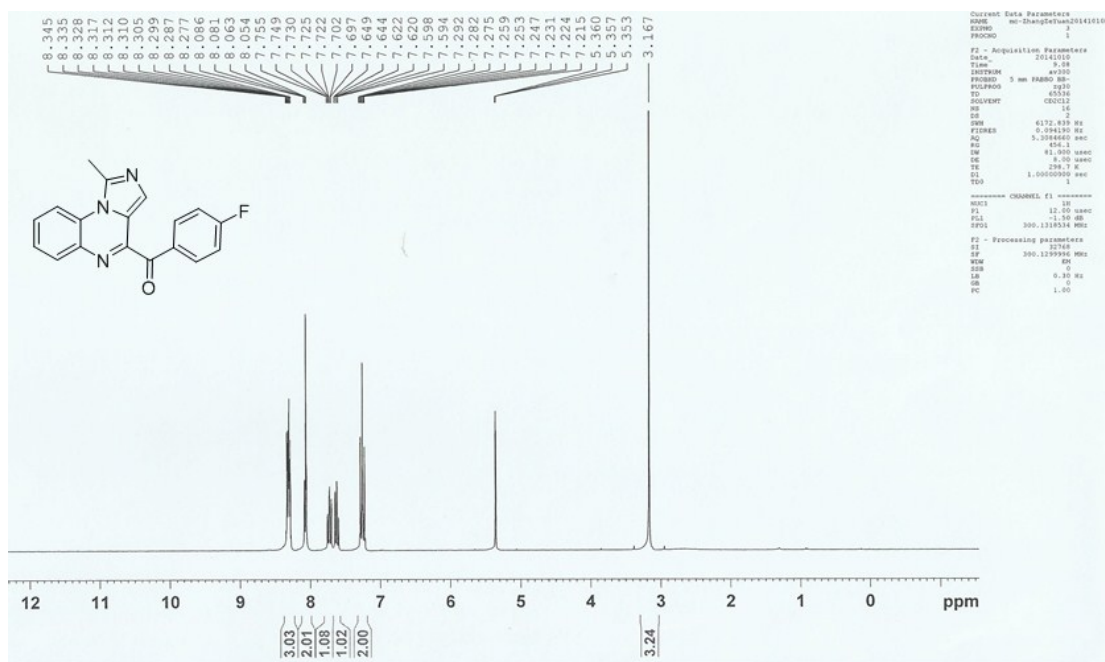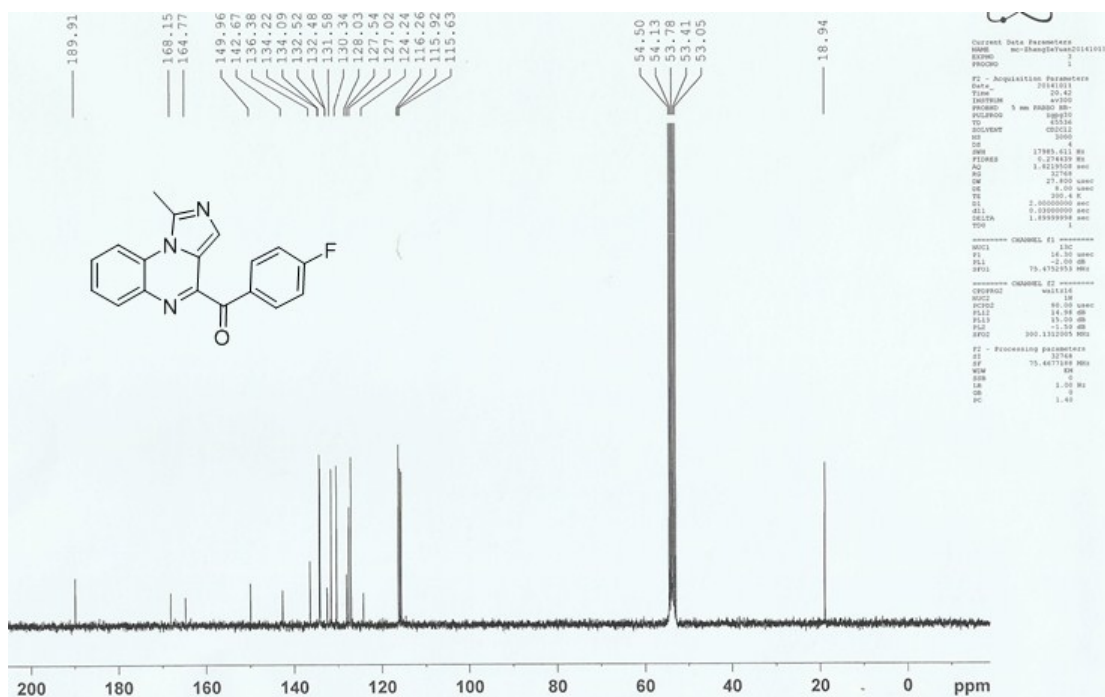

(3-Methylimidazo[1,5-a]quinoxalin-4-yl)(phenyl)methanone (**3ga**)

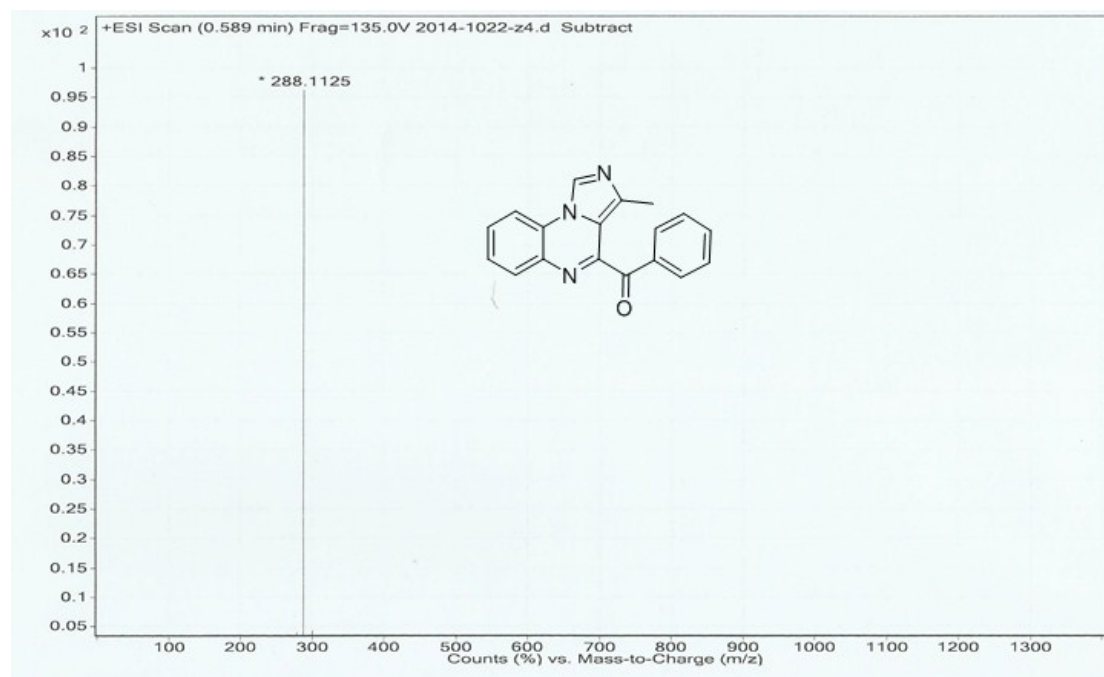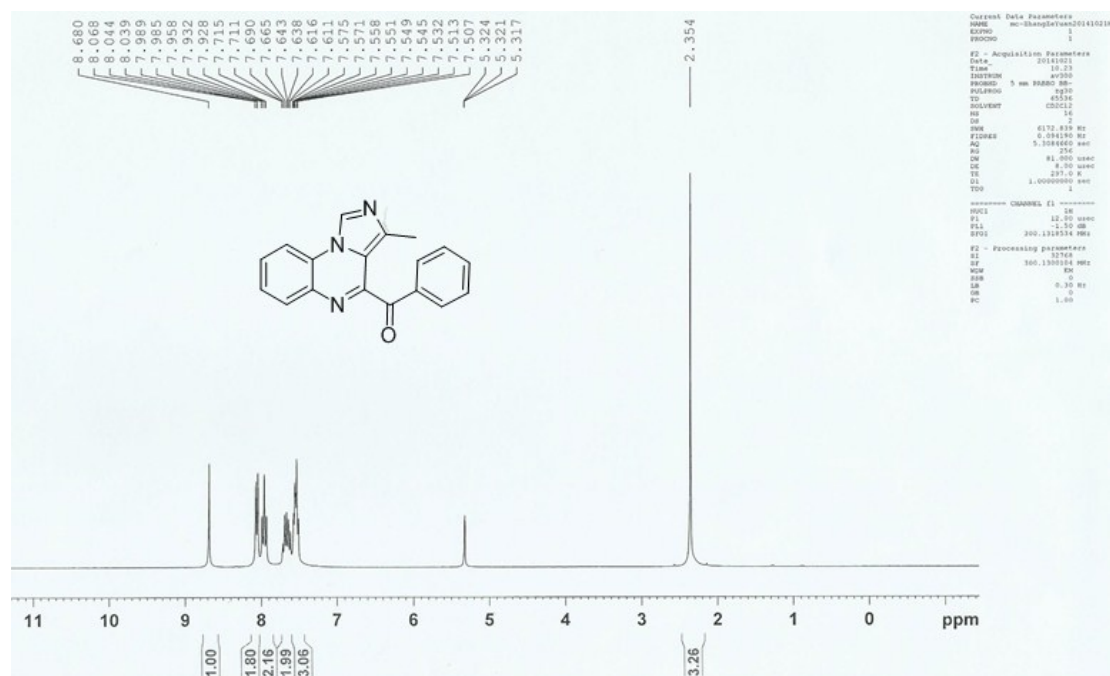

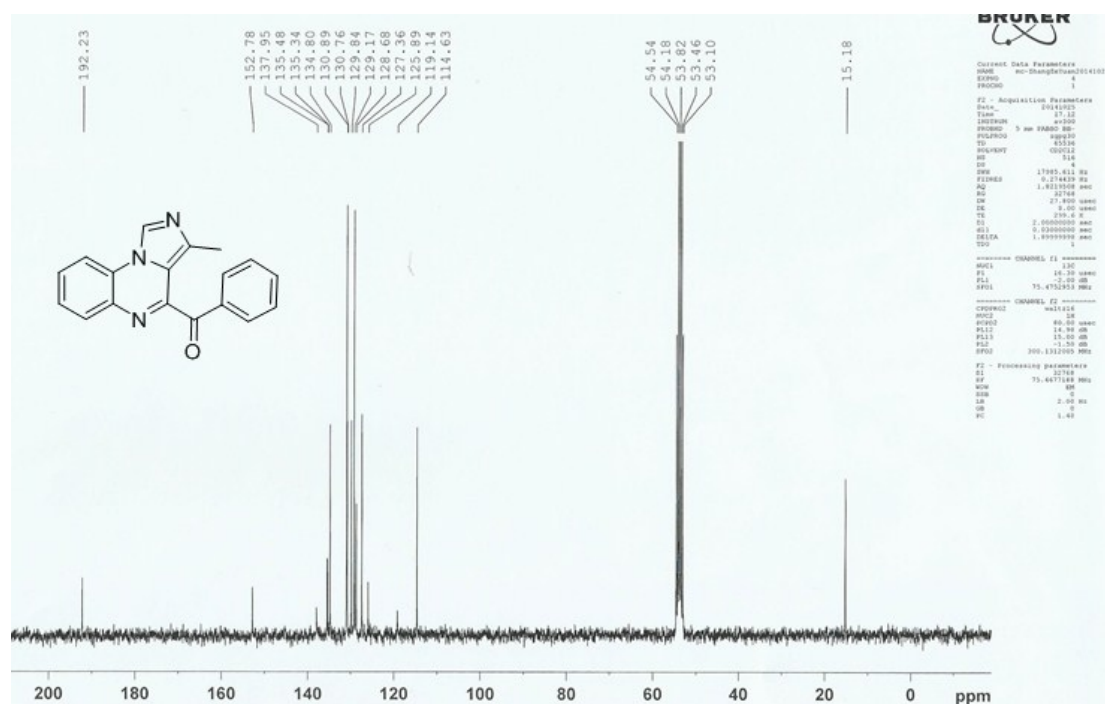

(4-Methoxyphenyl)(3-methylimidazo[1,5-a]quinoxalin-4-yl)methanone (**3gb**)

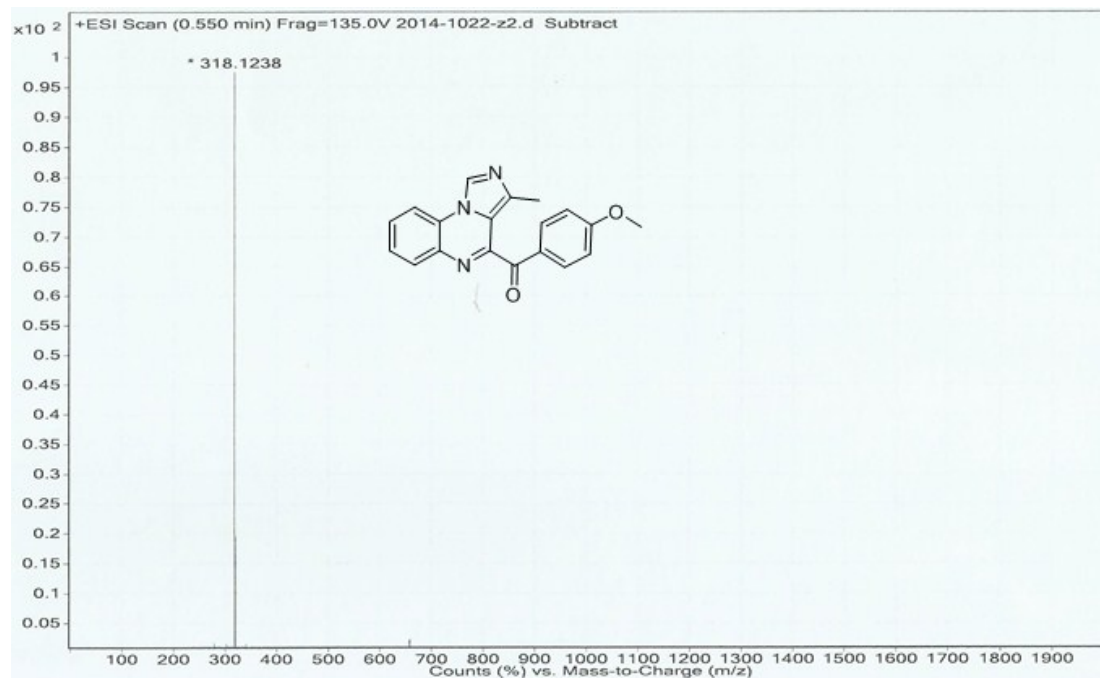



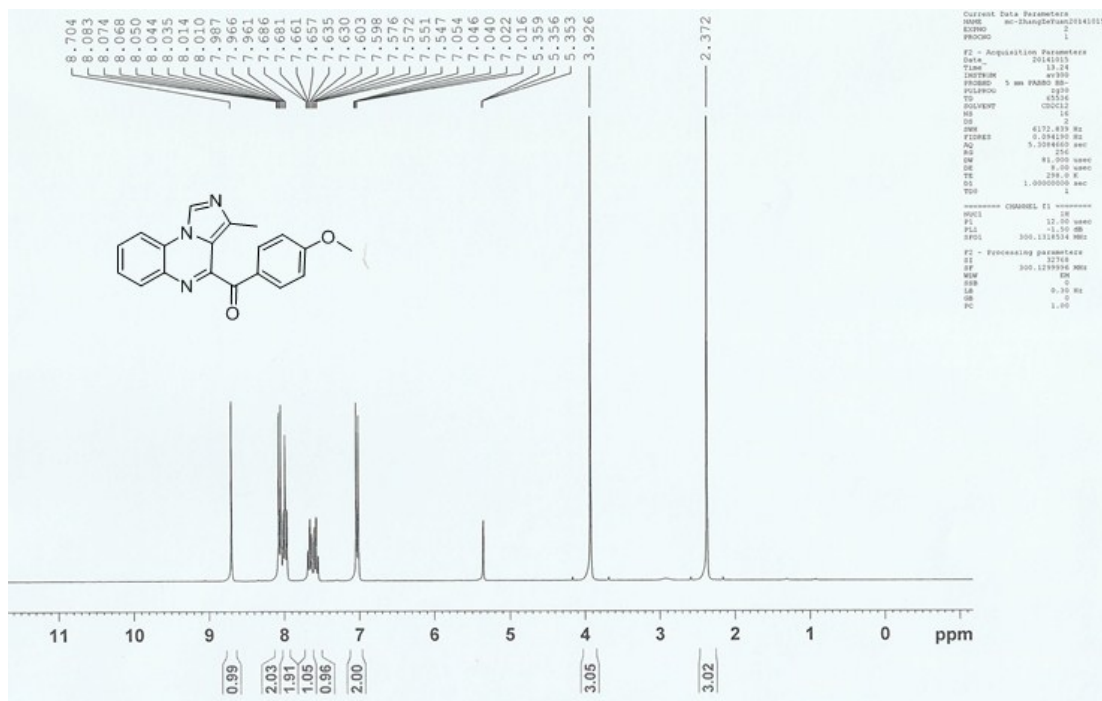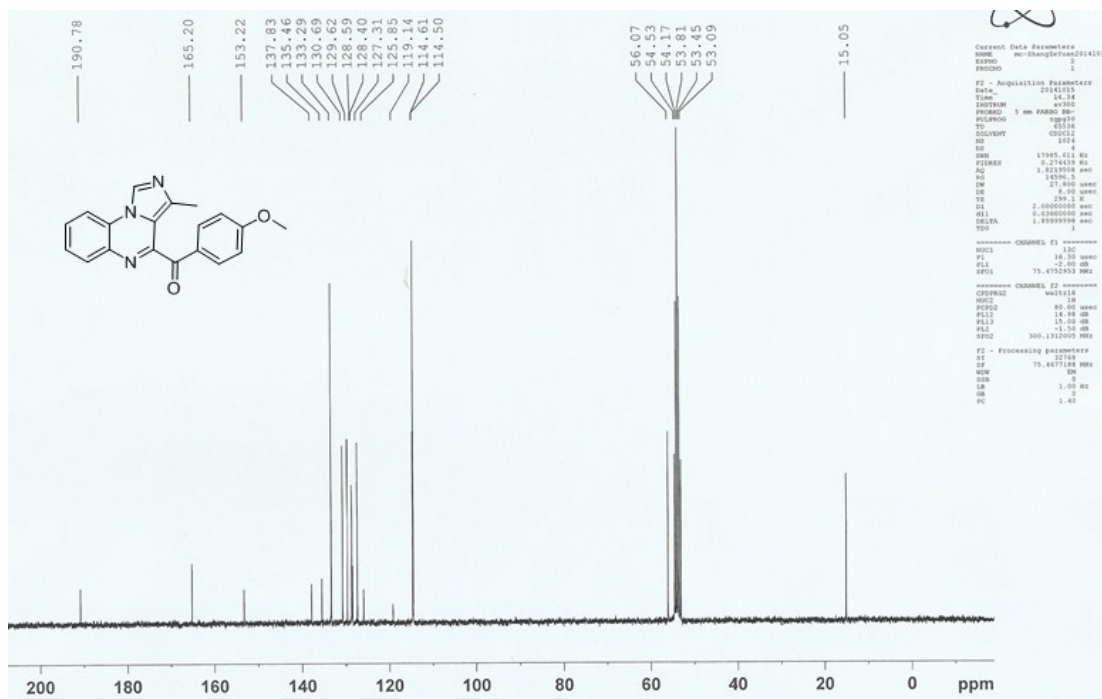

*Indolo[1,2-a]quinoxalin-6-yl(phenyl)methanone (3ha)*

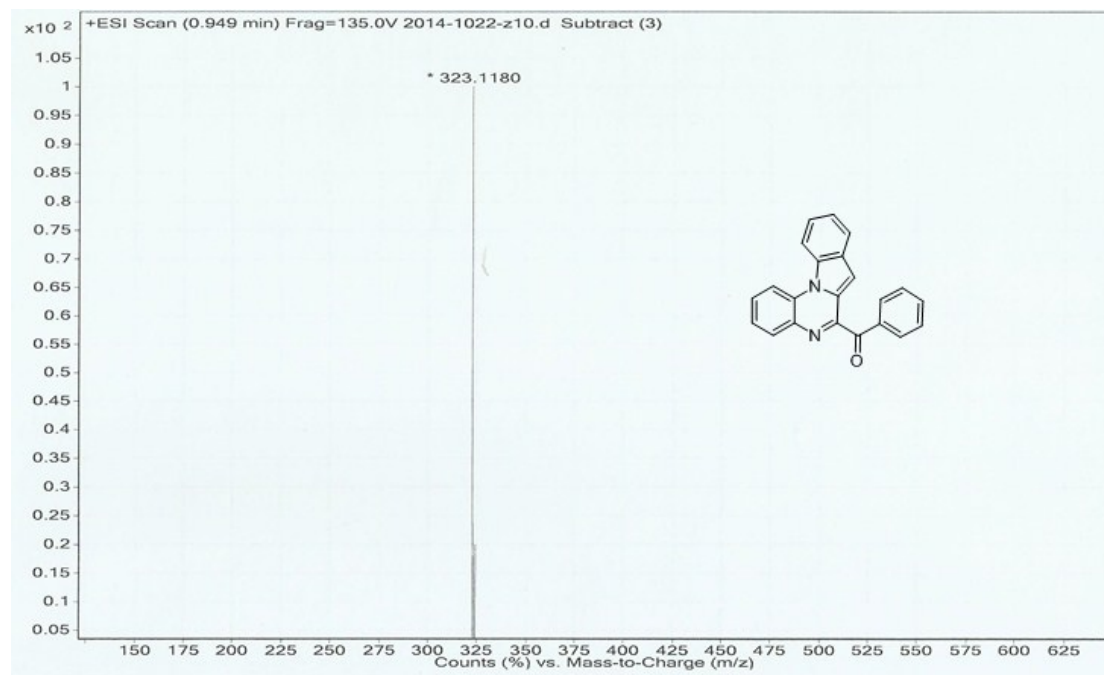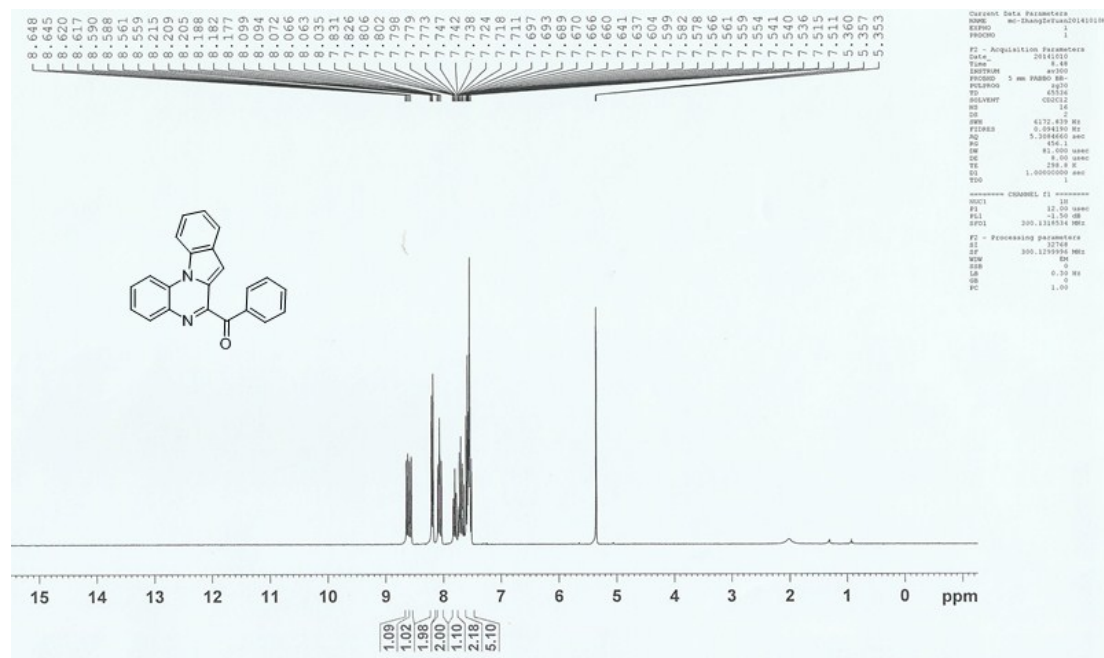



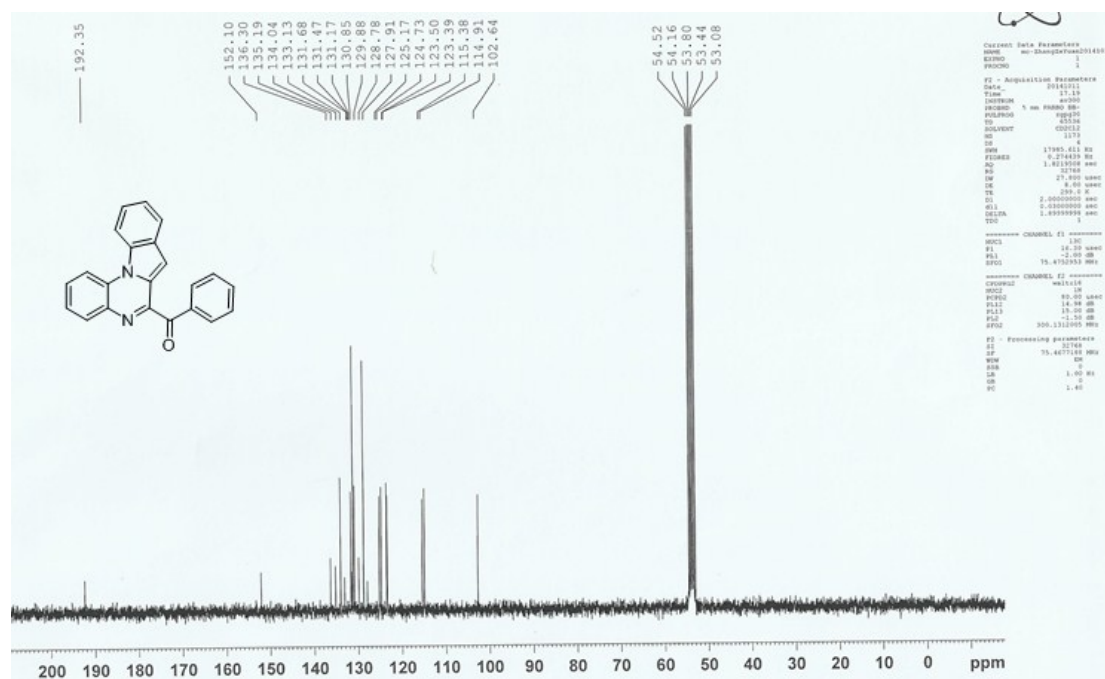

(7-Methylindolo[1,2-a]quinoxalin-6-yl)(phenyl)methanone (**3ia**)

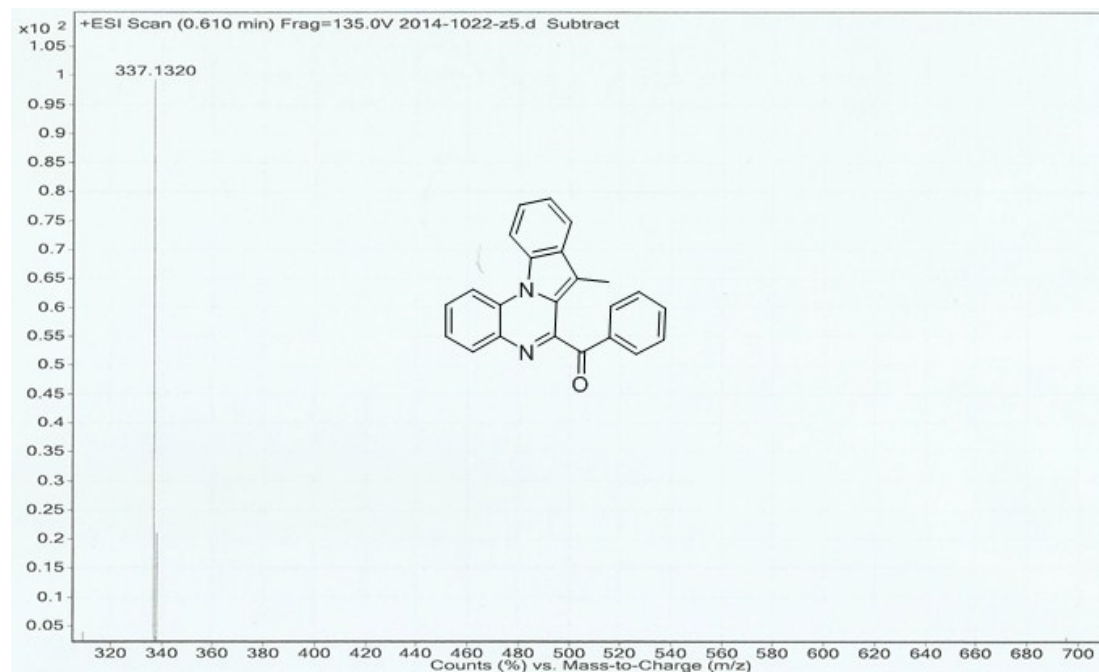



Chemical structure of the compound is shown above the mass spectrum. The structure is a complex polycyclic molecule, likely a derivative of a natural product or a synthetic compound, featuring a central benzene ring fused to a pyridine ring, with a carbonyl group and a fluorine atom attached to the pyridine ring.

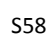

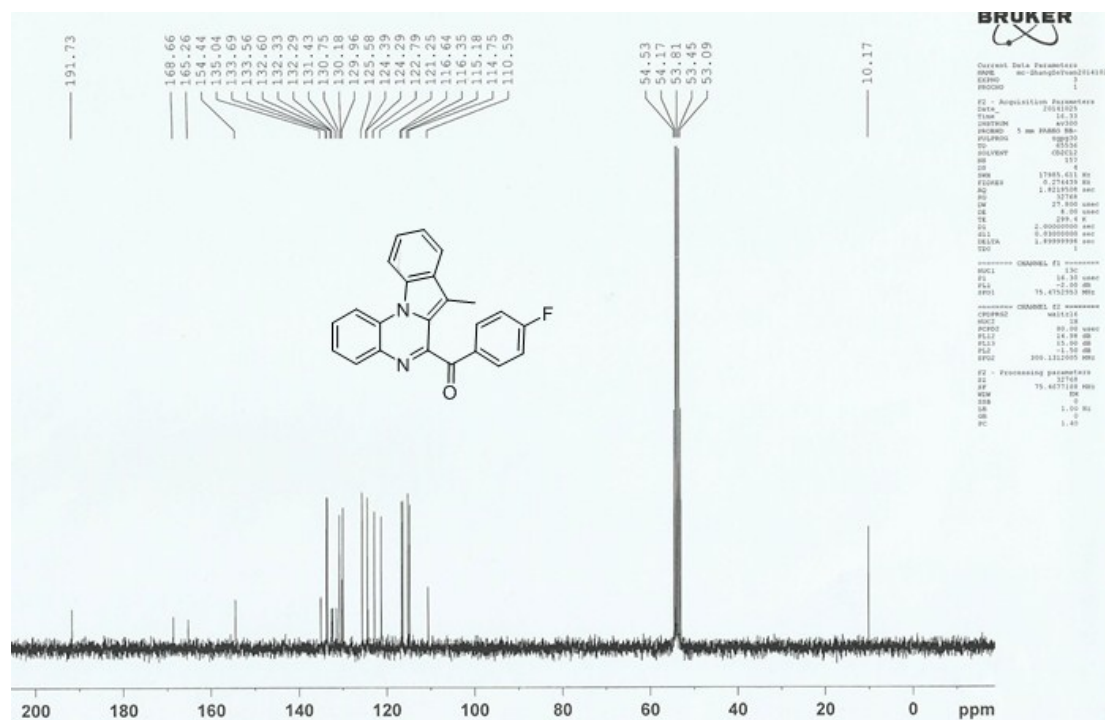

(7-fluoropyrrolo[1,2-a]quinoxalin-4-yl)(phenyl)methanone (**3la**)

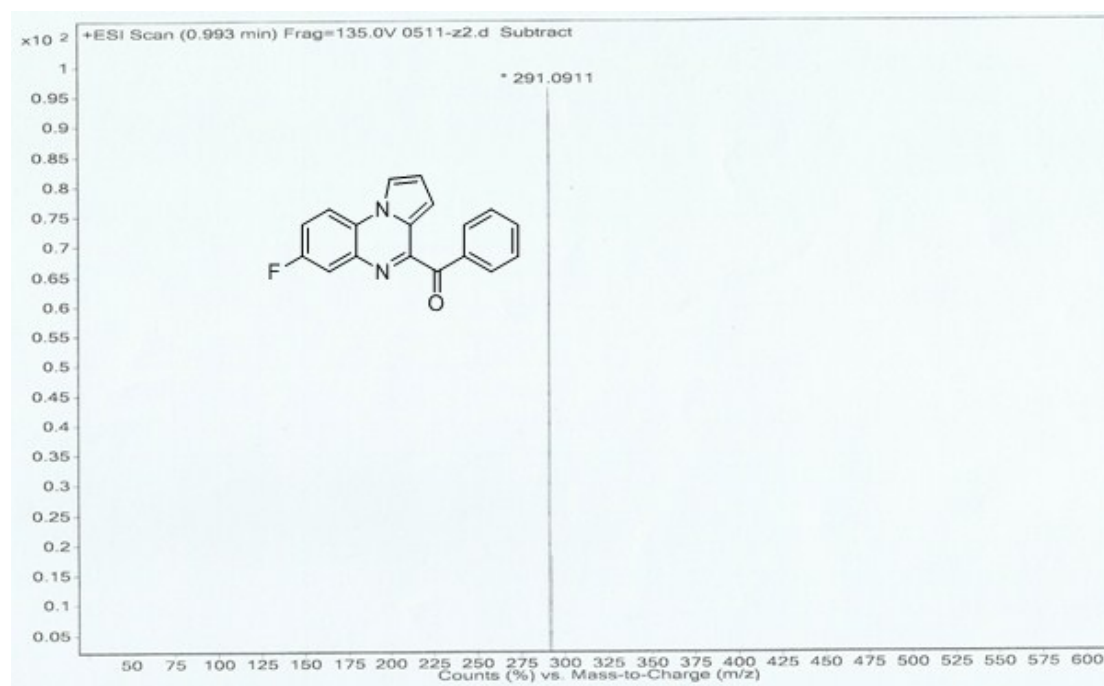

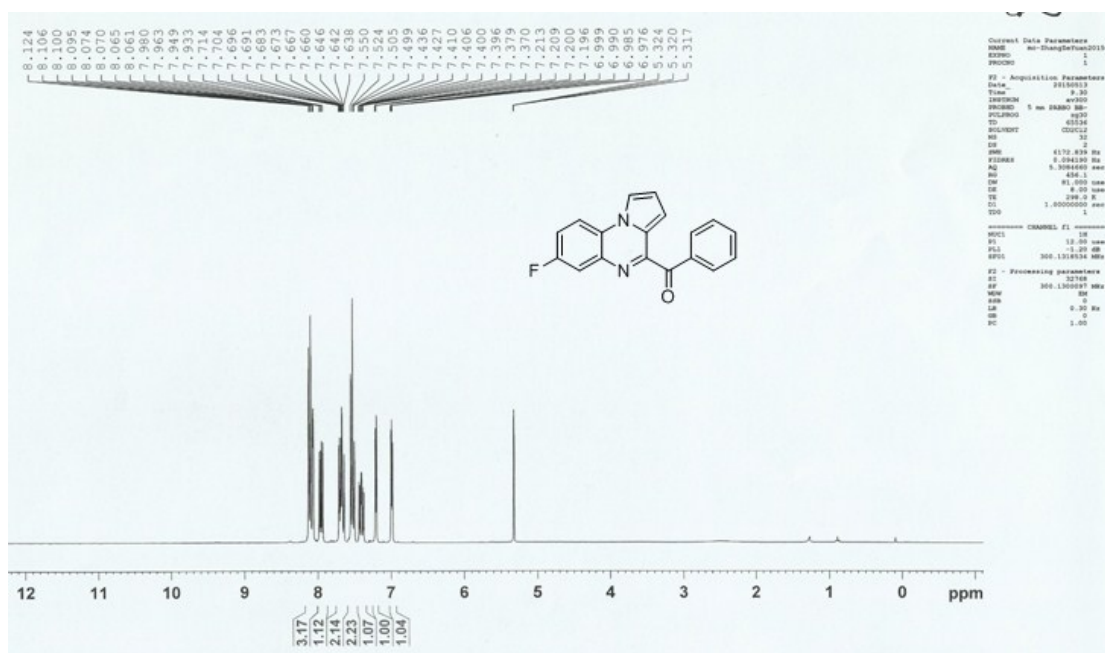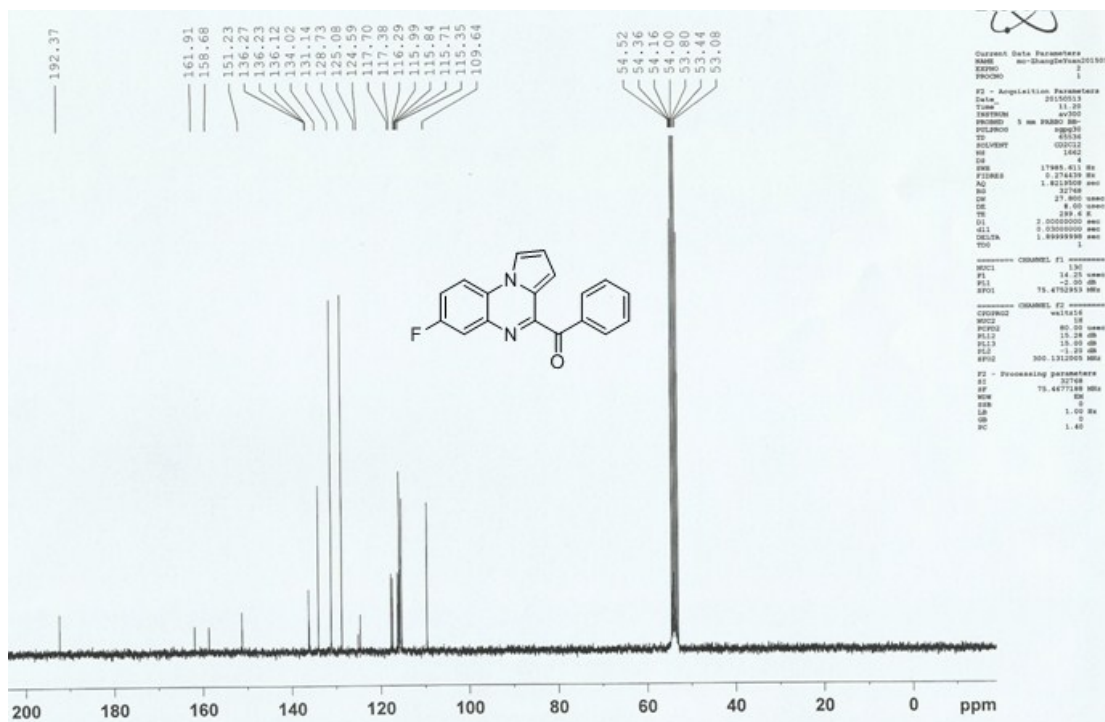

Supplement: c5qo00124b1.pdf [file c5qo00124b1.pdf]
